# Supplementary material for: New insights into chalcogen bonding provided by co-crystal structures of benzisoselenazolinone derivatives and nitrogen bases
Source: Royal Society of Chemistry journal article supplement (doi:10.1039/c8ce01853g), 2019-01-01
Supplement: c8ce01853g1.pdf [file c8ce01853g1.pdf]

# New insights into Chalcogen bonding provided by cocrystal structures of benzoselenazolinone derivatives and nitrogen bases.

Thomas Fellowes,<sup>1</sup> Jonathan White<sup>1,\*</sup>

1. School of Chemistry and the BIO-21 Institute, University of Melbourne

\*Corresponding author: whitejm@unimelb.edu.au

Supporting Information

|                                                                                   |             |
|-----------------------------------------------------------------------------------|-------------|
| <b>Synthetic procedures.</b>                                                      | Page 1      |
| <b>SUPP-Figure 1.</b> <sup>1</sup> H NMR spectrum of <b>1b</b> .                  | Page 3      |
| <b>SUPP-Figure 2.</b> <sup>1</sup> H NMR spectrum of <b>1b</b> expanded           | Page 3      |
| <b>SUPP-Figure 3.</b> <sup>13</sup> C NMR spectrum of <b>1b</b>                   | Page 4      |
| <b>SUPP-Figure 4.</b> <sup>13</sup> C NMR spectrum of <b>1b</b> expanded          | Page 4      |
| <b>SUPP-Figure 5.</b> <sup>1</sup> H NMR spectrum of <b>3</b> .                   | Page 5      |
| <b>SUPP-Figure 6.</b> <sup>1</sup> H NMR spectrum of <b>3</b> expanded            | Page 5      |
| <b>Crystallography.</b>                                                           | Page 6-10   |
| <b>SUPP-Figure 7.</b> Thermal ellipsoid plot for <b>1a</b> .DMAP.                 | Page 6      |
| <b>SUPP-Figure 8.</b> Thermal ellipsoid plot of <b>1b</b> .                       | Page 6      |
| <b>SUPP-Figure 9.</b> Thermal ellipsoid plot for <b>1b</b> .DMAP.H <sub>2</sub> O | Page 7      |
| <b>SUPP-Figure 10.</b> Thermal ellipsoid plot for <b>1b</b> .DMAP (2 molecules)   | Page 7      |
| <b>SUPP-Figure 11.</b> Thermal ellipsoid plot for <b>1b</b> .QUINUCLIDINE.        | Page 8      |
| <b>SUPP-Figure 12.</b> Thermal ellipsoid plot for <b>1b</b> .DABCO                | Page 8      |
| <b>SUPP-Figure 13.</b> Thermal ellipsoid plot of <b>3</b>                         | Page 9      |
| <b>SUPP-Figure 14.</b> Thermal ellipsoid plot for <b>3</b> -PYRIDINE              | Page 9      |
| <b>SUPP-Figure 15.</b> Thermal ellipsoid plot for <b>3</b> .DMAP                  | Page 10     |
| <b>Computational.</b>                                                             | Pages 11-39 |
| <b>Calculated structures for:</b>                                                 |             |
| <b>1a, 1b, 3, pyridine, DMAP, DABCO, Quinuclidine</b>                             | Pages 11-14 |
| <b>Calculated structures and NBO interaction energies for:</b>                    |             |
| <b>1a.Pyridine.</b>                                                               | Page 15     |
| <b>1a.DMAP.</b>                                                                   | Page 17     |
| <b>1a.DABCO.</b>                                                                  | Page 19     |
| <b>1a.Quinuclidine.</b>                                                           | Page 21     |
| <b>1b.Pyridine.</b>                                                               | Page 23     |
| <b>1b.DMAP.</b>                                                                   | Page 25     |
| <b>1b.DMAP.H<sub>2</sub>O</b>                                                     | Page 27     |
| <b>1b.DABCO.</b>                                                                  | Page 30     |
| <b>3.Pyridine.</b>                                                                | Page 32     |
| <b>3.DMAP.</b>                                                                    | Page 34     |
| <b>3.DABCO.</b>                                                                   | Page 36     |
| <b>3.Quinuclidine.</b>                                                            | Page 39     |
| <b>Obs and Calc powder 1a-DMAP</b>                                                | Page 42     |
| <b>Obs and Calc powder 1b-DMAP</b>                                                | Page 43     |
| <b>Obs and Calc powder 1b-DMAP-H<sub>2</sub>O</b>                                 | Page 44     |
| <b>Obs and Calc powder 1b-DABCO</b>                                               | Page 45     |
| <b>Obs and Calc powder 1b-Quinuclidine</b>                                        | Page 46     |
| <b>Obs and Calc powder 3-Pyridine</b>                                             | Page 47     |
| <b>Obs and Calc powder 3-DMAP</b>                                                 | Page 48     |
| <b>References.</b>                                                                | Page 49     |

## Synthetic Procedures

### 2-phenylbenzo[d][1,2]selenazol-3(2H)-one: **1a**

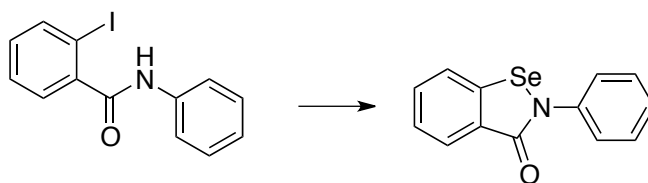

Copper iodide (98.4 mg, 0.517 mmol) and 1,10-phenanthroline (83.1 mg, 0.461 mmol) were stirred in anhydrous DMF (3 mL) for 15 mins at r.t., then 2-iodo-N-phenylbenzamide (653.2 mg, 2.021 mmol), selenium (196.9 mg, 2.495 mmol) and potassium carbonate (627.3 mg, 4.539 mmol) were added sequentially under a flow of argon. The mixture was heated at 110°C for 8h, when TLC showed consumption of starting material. The mixture was then tipped into brine (30 mL) and stirred to form a brown precipitate, which was extracted into DCM (40 mL) and washed with water (2 x 20mL). The DCM solution was filtered through a silica plug, then evaporated, and the residue applied to a SNAP 25g silica cartridge, eluting with a petroleum ether/ethyl acetate gradient. The major peak was evaporated to afford colourless crystals of **1a** (378.8 mg, 69%, m.p. 179.1-180.3°C, lit. mp 180-181).<sup>1</sup> <sup>77</sup>Se NMR  $\delta$  959.66

### 2-benzylbenzo[d][1,2]selenazol-3(2H)-one: **1b**

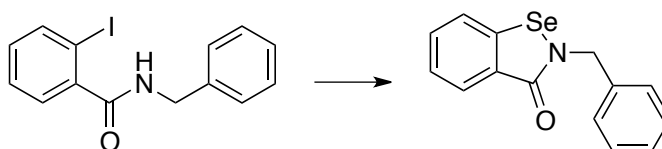

Copper iodide (95.8 mg, 0.503 mmol) and 1,10-phenanthroline (93.8 mg, 0.521 mmol) were stirred in anhydrous DMF (3 mL) for 15 mins at r.t., then N-benzyl-2-iodobenzamide (860.9 mg, 2.553 mmol), selenium (256.6 mg, 3.249 mmol) and potassium carbonate (542.2 mg, 3.923 mmol) were added sequentially under a flow of argon. The mixture was heated at 110°C for 5h, when TLC showed consumption of starting material. The mixture was then tipped into brine (30 mL) and stirred to form a solid mass, which was dissolved in DCM (40 mL) and washed with water (2 x 20mL). The DCM solution was filtered through a silica plug, then evaporated, and the residue applied to a SNAP 50g silica cartridge, eluting with a petroleum ether/ethyl acetate gradient. The major peak was evaporated to afford pale yellow crystals of **1b** (396.4 mg, 53%, m.p. 137.8-138.8°C). <sup>77</sup>Se NMR  $\delta$  884.02. Crystals suitable for x-ray analysis were obtained from dichloromethane/pentane.

### 5H-benzo[4,5][1,2]selenazolo[2,3-a]quinazolin-5-one: **3**

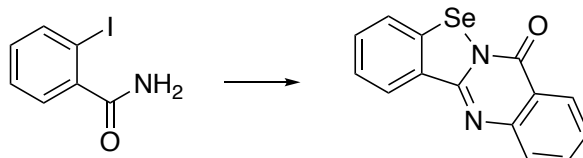

Copper iodide (96.4 mg, 0.503 mmol) and 1,10-phenanthroline (85.7 mg, 0.476 mmol) were stirred in anhydrous DMF (4 mL) for 10 mins at r.t., then 2-iodobenzamide (510.6 mg, 2.067 mmol), selenium (209.5 mg, 2.653 mmol) and potassium carbonate (506.3 mg, 3.663 mmol) were added sequentially under a flow of argon. The mixture was heated at 110°C for 12h, when TLC showed consumption of starting material. The mixture was then tipped into brine (30 mL) and stirred to form a solid mass, which was extracted into ethyl acetate (20 mL) and washed with water (2 x 20mL). The DCM solution was filtered through a silica plug, then evaporated, and the residue applied to a SNAP 50g silica cartridge, eluting with a petroleum ether/ethyl acetate gradient. The major peak was evaporated to afford pale yellow crystals of **3** (45.8 mg,

15%, m.p. 267-268°C).  $^{77}\text{Se}$  NMR  $\delta$  992.48. Crystals suitable for x-ray analysis were obtained from dichloromethane/pentane.

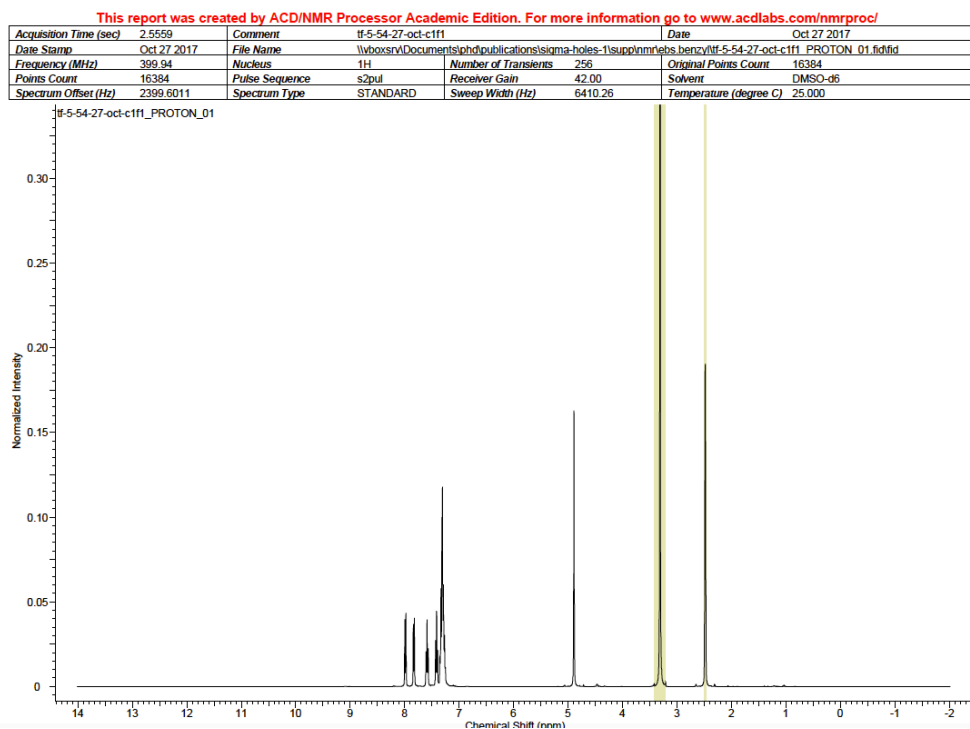

SUPP-Figure 1.  $^1\text{H}$  nmr spectrum of **1b** in D6-DMSO

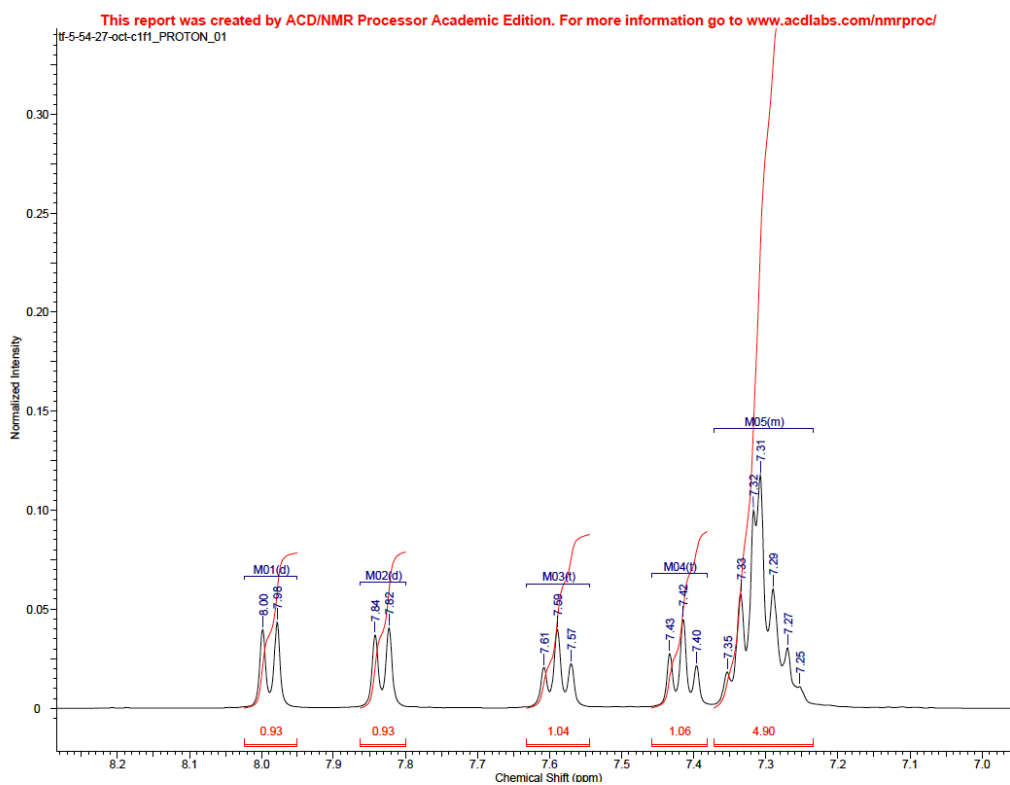

SUPP-Figure 2.  $^1\text{H}$  nmr spectrum of **1b** in D6-DMSO, expanded aromatic region.

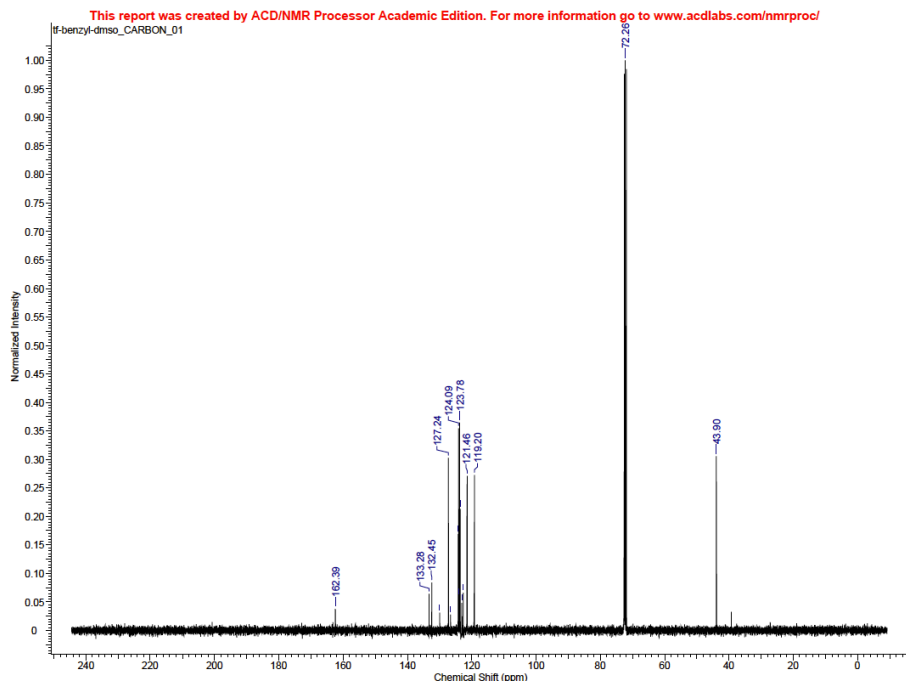

SUPP-Figure 3.  $^{13}\text{C}$  nmr spectrum of **1b** in D6-DMSO.

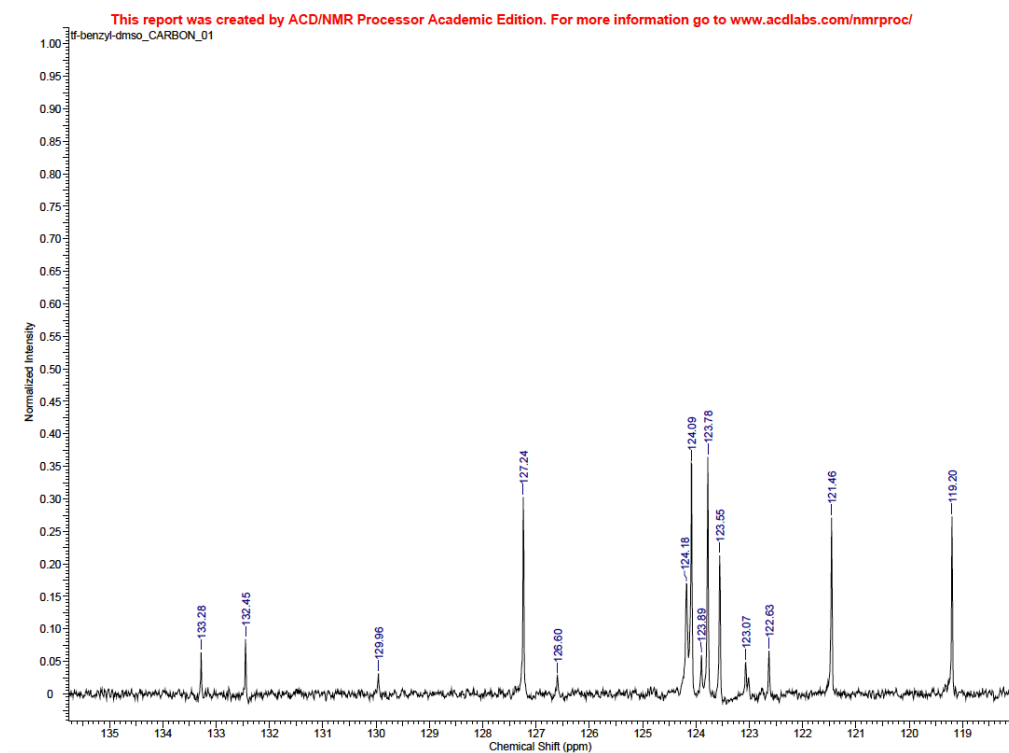

SUPP-Figure 3.  $^{13}\text{C}$  nmr spectrum of **1b** in D6-DMSO, expanded.

This report was created by ACD/NMR Processor Academic Edition. For more information go to [www.acdlabs.com/nmrproc/](http://www.acdlabs.com/nmrproc/)

|                        |                                                                                              |                      |              |                       |              |                        |             |
|------------------------|----------------------------------------------------------------------------------------------|----------------------|--------------|-----------------------|--------------|------------------------|-------------|
| Acquisition Time (sec) | 2.5559                                                                                       | Comment              | tf-5-30-c1f1 | Date                  | Sep 22 2017  | Date Stamp             | Sep 22 2017 |
| File Name              | \\vbosrv\Documents\lphd\publications\sigma-holes-1\suppl\nmr\dimertf-5-30-c1f1_PROTON_01.fid |                      |              | Frequency (MHz)       | 399.94       |                        |             |
| Nucleus                | <sup>1</sup> H                                                                               | Number of Transients | 64           | Original Points Count | 16384        |                        |             |
| Pulse Sequence         | s2pul                                                                                        | Receiver Gain        | 52.00        | Solvent               | CHLOROFORM-d |                        |             |
| Spectrum Offset (Hz)   | 2399.6030                                                                                    | Spectrum Type        | STANDARD     | Sweep Width (Hz)      | 6410.26      | Temperature (degree C) | 25.000      |

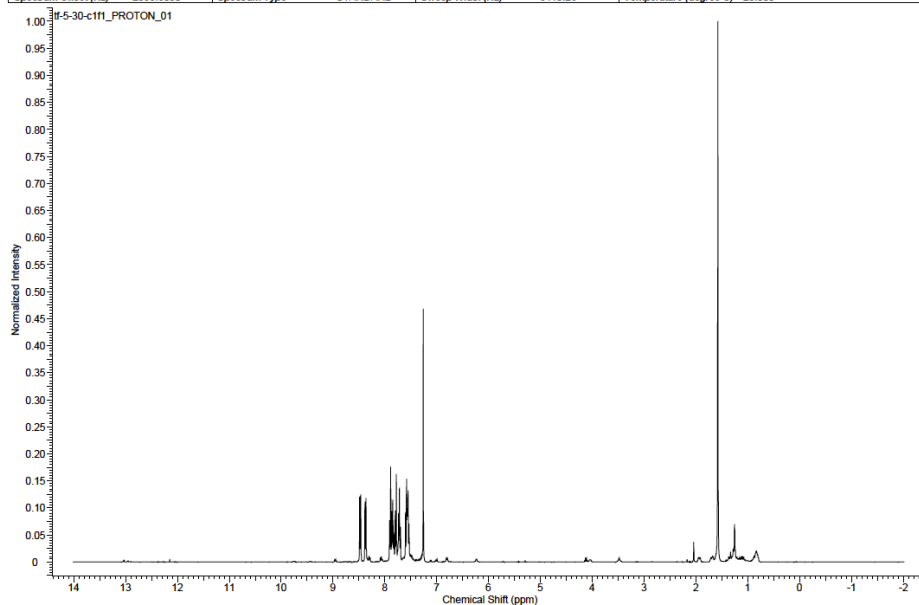

SUPP-Figure 5. <sup>1</sup>H nmr spectrum of **3** in CDCl<sub>3</sub>.

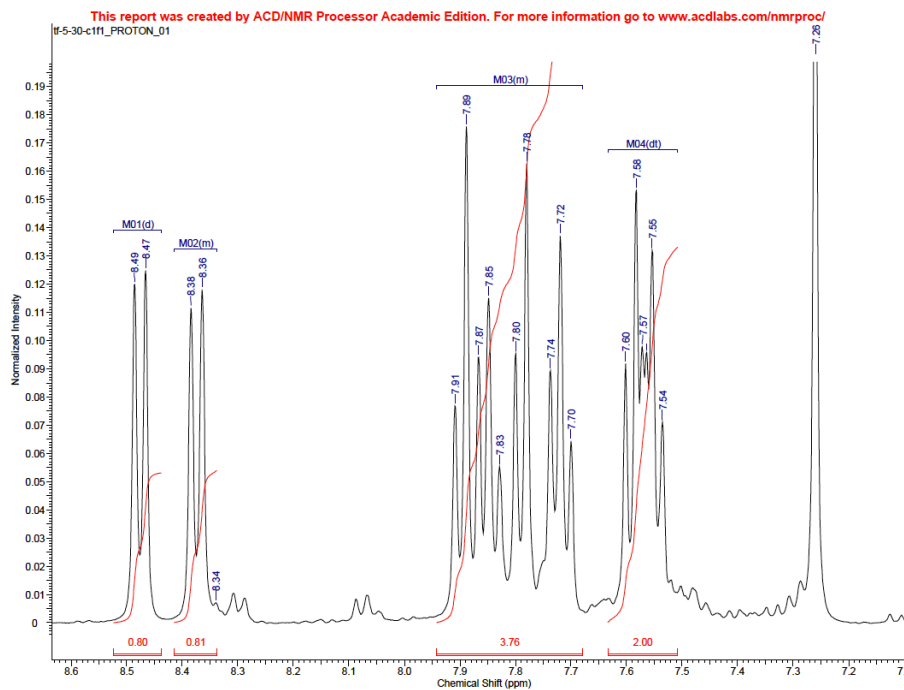

SUPP-Figure 6. <sup>1</sup>H nmr spectrum of **3** in CDCl<sub>3</sub>.

## (1) Crystallography

Intensity data was collected on an Oxford Diffraction SuperNova CCD diffractometer using either Cu-K $\alpha$  or Mo-K $\alpha$  radiation at 130.0(1)K, or on a Rigaku XtaLAB Synergy at 100.0(1)K. Compound **1b**.DMAP.H<sub>2</sub>O underwent a destructive phase change when cooling to 130 K, therefore data were collected at 200K. Data for **3** was collected on the MX1 beamline<sup>2</sup> at the Australian Synchrotron. The temperature was maintained using an Oxford Cryostream cooling device. The structures were solved by direct methods and difference Fourier synthesis.<sup>3</sup> Thermal ellipsoid plot was generated using the program ORTEP-3<sup>4</sup> integrated within the WINGX<sup>5</sup> suite of programs.

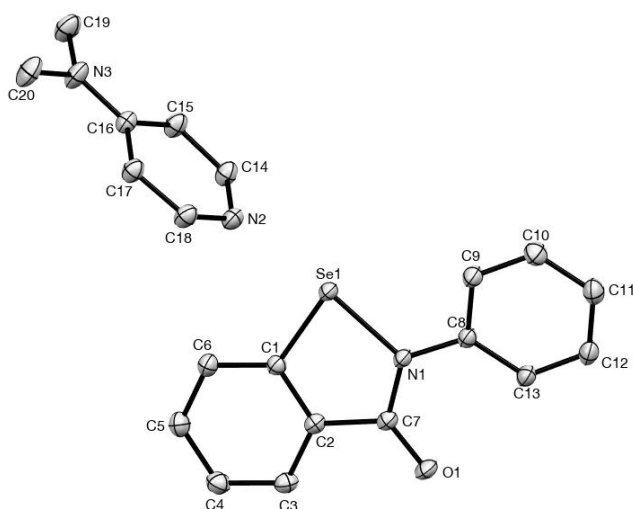

**SUPP-Figure 7.** Thermal ellipsoid plot for **1a**.DMAP. Ellipsoids are at the 30% probability level.

Crystal data for **1a**.DMAP. C<sub>20</sub>H<sub>19</sub>N<sub>3</sub>OSe,  $M = 396.34$ ,  $T = 130.0$  K,  $\lambda = 0.71073$  Å, Triclinic, space group P-1,  $a = 8.3674(3)$  Å,  $b = 9.8399(5)$  Å,  $c = 10.6622(5)$  Å,  $\alpha = 93.296(4)^\circ$ ,  $\beta = 93.021(4)^\circ$ ,  $\gamma = 101.210(4)^\circ$ ,  $V = 857.86(7)$  Å<sup>3</sup>,  $Z = 2$ ,  $D_c = 1.534$  mg M<sup>-3</sup>,  $\mu(\text{Mo-K}\alpha) = 2.201$  mm<sup>-1</sup>,  $F(000) = 404$  crystal size 0.52 x 0.34 x 0.23 mm<sup>3</sup>, 11339 reflections measured  $\theta_{\text{max}} = 36.66^\circ$ , 7889 independent reflections [ $R(\text{int}) = 0.0163$ ], the final  $R$  was 0.0293 [ $I > 2\sigma(I)$ , 6882 data] and  $wR(F^2)$  was 0.0721 (all data), GOF 0.992. CCDC 1867205. From dichloromethane/pentane (70%) m.p. 111.3-112.1°C.

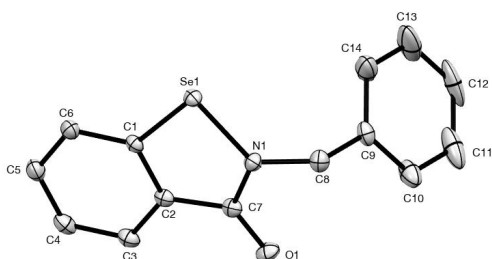

**SUPP-Figure 8.** Thermal ellipsoid plot of **1b**. Ellipsoids are at the 30% probability level.

Crystal data for **1b**.  $C_{14}H_{11}NOSe$ ,  $M = 288.20$ ,  $T = 100.0$  K,  $\lambda = 0.71073$  Å, Orthorhombic, space group  $Pca2_1$ ,  $a = 11.7848(3)$ ,  $b = 4.5869(1)$ ,  $c = 21.3572(5)$  Å,  $V = 1154.48(5)$  Å<sup>3</sup>,  $Z = 4$ ,  $D_c = 1.658$  mg M<sup>-3</sup>  $\mu(Mo-K\alpha)$  3.233 mm<sup>-1</sup>,  $F(000) = 576$  crystal size 0.63 x 0.54 x 0.22 mm<sup>3</sup>, 44918 reflections measured  $\theta_{max} = 45.38^\circ$ , 9588 independent reflections [ $R(int) = 0.0481$ ], the final R was 0.0331 [ $I > 2\sigma(I)$ , 7848 data] and  $wR(F^2)$  was 0.0792 (all data), GOF 1.063. CCDC 1867211.

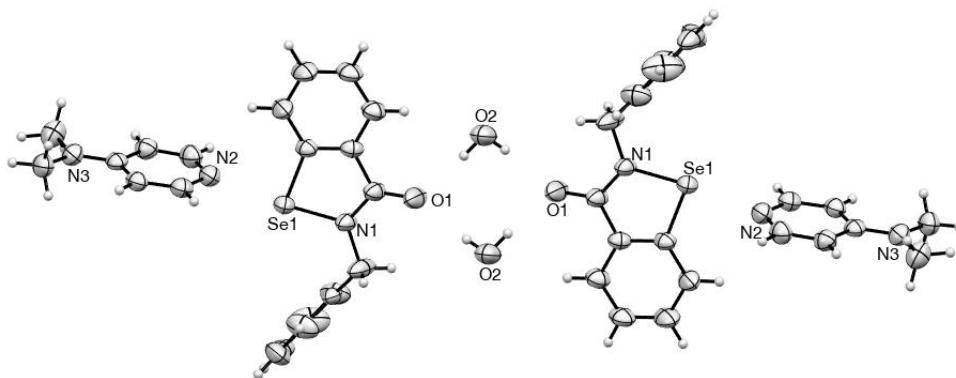

**SUPP-Figure 9.** Thermal ellipsoid plot for **1b.DMAP.H<sub>2</sub>O**. Ellipsoids are at the 30% probability level.

Crystal data for **1b.DMAP.H<sub>2</sub>O**.  $C_{21}H_{21}N_3OSe \cdot (H_2O)$ ,  $M = 428.38$ ,  $T = 200.0$  K,  $\lambda = 0.71073$  Å, Triclinic, space group  $P-1$ ,  $a = 9.6254(2)$ ,  $b = 10.2486(2)$ ,  $c = 10.6505(2)$  Å,  $\alpha = 83.660(2)^\circ$ ,  $\beta = 76.398(2)^\circ$ ,  $\gamma = 78.423(2)^\circ$ ,  $V = 998.19(4)$  Å<sup>3</sup>,  $Z = 2$ ,  $D_c = 125$  mg M<sup>-3</sup>  $\mu(Mo-K\alpha)$  1.901 mm<sup>-1</sup>,  $F(000) = 440$  crystal size 0.41 x 0.32 x 0.23 mm<sup>3</sup>, 30047 reflections measured  $\theta_{max} = 41.06^\circ$ , 12528 independent reflections [ $R(int) = 0.0267$ ], the final R was 0.0456 [ $I > 2\sigma(I)$ , 6303 data] and  $wR(F^2)$  was 0.1219 (all data), GOF 1.000. CCDC 1867213. From THF in an open flask (90%) m.p. 96-97°C

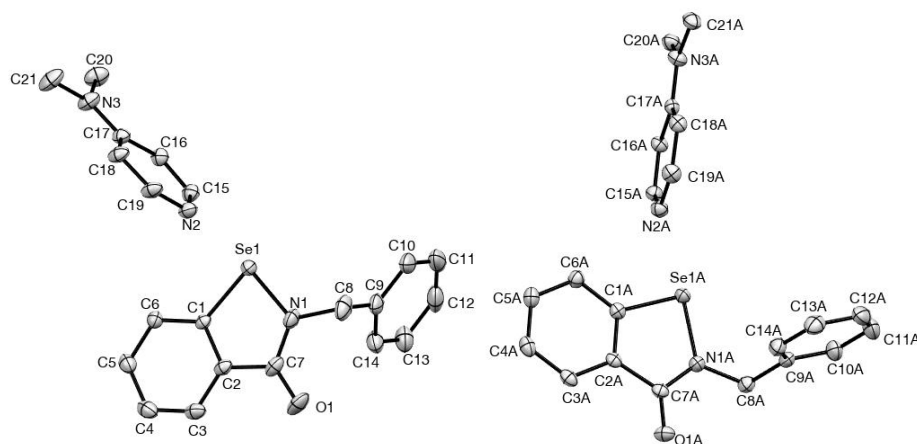

**SUPP-Figure 10.** Thermal ellipsoid plot for the two independent molecules **1b**.DMAP. Ellipsoids are at the 30% probability level.

Crystal data for **1b**.DMAP.  $C_{21}H_{21}N_3OSe$ ,  $M = 410.37$ ,  $T = 130.0$  K,  $\lambda = 0.71073$  Å, Triclinic, space group P-1,  $a = 9.6002(4)$ ,  $b = 10.2109(4)$ ,  $c = 19.8380(7)$  Å,  $\alpha = 78.710(3)^\circ$ ,  $\beta = 84.901(3)^\circ$ ,  $\gamma = 77.458(4)^\circ$ ,  $V = 1859.33(13)$  Å<sup>3</sup>,  $Z = 4$ ,  $Z' = 2$ ,  $D_c = 1.466$  mg M<sup>-3</sup>,  $\mu(\text{Mo-K}\alpha) = 2.034$  mm<sup>-1</sup>,  $F(000) = 840$  crystal size 0.65 x 0.24 x 0.37 mm<sup>3</sup>, 36541 reflections measured  $\theta_{\text{max}} = 40.95^\circ$ , 23437 independent reflections [ $R(\text{int}) = 0.0264$ ], the final R was 0.0448 [ $I > 2\sigma(I)$ , 15177 data] and  $wR(F^2)$  was 0.1120 (all data), GOF 1.044. CCDC 1867209. From dichloromethane/pentane (60%) m.p. 86.1-92.5°C.

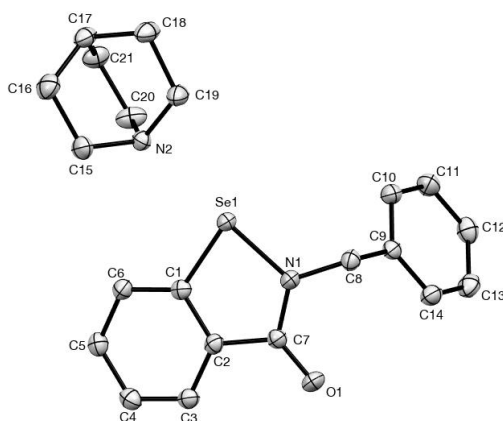

**SUPP-Figure 11.** Thermal ellipsoid plot for **1b**.QUINUCLIDINE. Ellipsoids are at the 30% probability level.

Crystal data for **1b**.QUINUCLIDINE.  $C_{21}H_{24}N_2OSe$ ,  $M = 399.38$ ,  $T = 130.0$  K,  $\lambda = 1.54184$  Å, Monoclinic, space group  $P2_1/c$ ,  $a = 10.1610(2)$ ,  $b = 16.0506(3)$ ,  $c = 11.4300(2)$  Å,  $\beta = 104.622(2)^\circ$ ,  $V = 1803.75(6)$  Å<sup>3</sup>,  $Z = 4$ ,  $D_c = 1.471$  mg M<sup>-3</sup>,  $\mu(\text{Cu-K}\alpha) = 3.895$  mm<sup>-1</sup>,  $F(000) = 824$  crystal size 0.29 x 0.10 x 0.03 mm<sup>3</sup>, 12588 reflections measured  $\theta_{\text{max}} = 77.19^\circ$ , 3771 independent reflections [ $R(\text{int}) = 0.0379$ ], the final R was 0.0329 [ $I > 2\sigma(I)$ , 3397 data] and  $wR(F^2)$  was 0.0849 (all data), GOF 1.028. CCDC 1867207. From chloroform pentane (50%) m.p. 135.2-137.4°C.

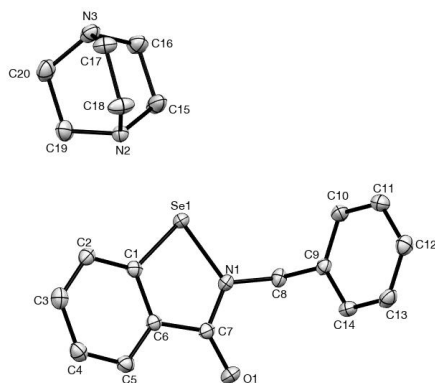

**SUPP-Figure 12.** Thermal ellipsoid plot for **1b**.DABCO. Ellipsoids are at the 30% probability level.



Crystal data for **1b**.DABCO.  $C_{20}H_{23}N_3OSe$ ,  $M = 400.37$ ,  $T = 130.0$  K,  $\lambda = 1.54184$  Å, Monoclinic, space group  $P2_1/c$ ,  $a = 10.1249(2)$ ,  $b = 15.9246(3)$ ,  $c = 11.4660(2)$  Å,  $\beta = 106.572(2)^\circ$   $V = 1771.93(6)$  Å<sup>3</sup>,  $Z = 4$ ,  $D_c = 1.501$  mg  $M^{-3}$   $\mu(Cu-K\alpha) 2.965$  mm<sup>-1</sup>,  $F(000) = 824$  crystal size  $0.37 \times 0.17 \times 0.04$  mm<sup>3</sup>, 13121 reflections measured  $\theta_{max} = 77.12^\circ$ , 3711 independent reflections [ $R(int) = 0.0280$ ], the final  $R$  was 0.0258 [ $I > 2\sigma(I)$ , 3333 data] and  $wR(F^2)$  was 0.0657 (all data), GOF 1.056. CCDC 1867206. From dichloromethane/pentane (65%) m.p.  $131.4-133.3^\circ C$

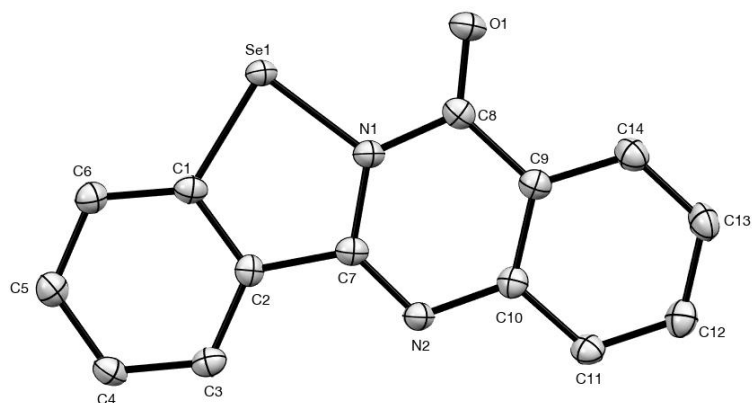

**SUPP-Figure 13.** Thermal ellipsoid plot of **3**. Ellipsoids are at the 30% probability level.

Crystal data for **3**.  $C_{14}H_8N_2O$  Se,  $M = 299.18$ ,  $T = 100.0$  K,  $\lambda = 0.71092$  Å, Orthorhombic, space group  $Pca2_1$ ,  $a = 17.371(4)$ ,  $b = 5.3080(11)$ ,  $c = 11.633(2)$  Å,  $V = 1072.6(4)$  Å<sup>3</sup>,  $Z = 4$ ,  $D_c = 1.853$  mg  $M^{-3}$   $3.486$  mm<sup>-1</sup>,  $F(000) = 592$  crystal size  $0.15 \times 0.10 \times 0.02$  mm<sup>3</sup>, 16031 reflections measured  $\theta_{max} = 31.56^\circ$ , 2967 independent reflections [ $R(int) = 0.0363$ ], the final  $R$  was 0.0271 [ $I > 2\sigma(I)$ , 2061 data] and  $wR(F^2)$  was 0.0751 (all data), GOF 1.129. CCDC 1867208.

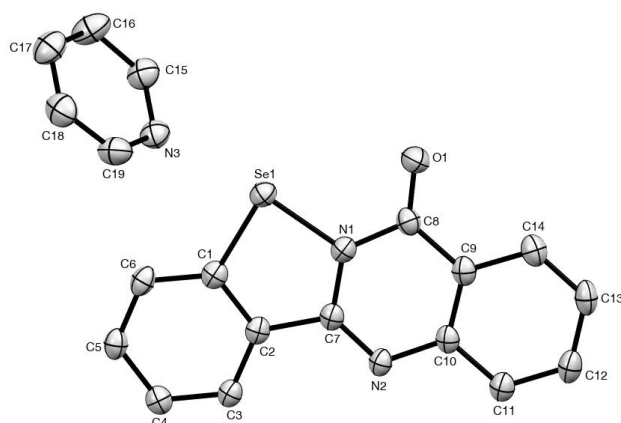

**SUPP- 14.** Thermal ellipsoid plot for **3-PYR**. Ellipsoids are at the 30% probability level.

Crystal data for **3**-PYR.  $C_{19}H_{13}N_3OSe$ ,  $M = 378.28$ ,  $T = 130.0$  K,  $\lambda = 1.54184$  Å, Monoclinic, space group  $P2_1/c$ ,  $a = 20.7476(9)$ ,  $b = 4.9407(2)$ ,  $c = 17.6687(7)$  Å,  $\beta = 107.376(4)^\circ$   $V = 1156.27(5)$  Å<sup>3</sup>,  $Z = 4$ ,  $D_c = 1.454$  mg  $M^{-3}$   $\mu(\text{CuK}\alpha) 3.018$  mm<sup>-1</sup>,  $F(000) = 760$  crystal size  $0.56 \times 0.05 \times 0.03$  mm<sup>3</sup>, 5766 reflections measured  $\theta_{\text{max}} = 75.76^\circ$ , 3419 independent reflections [ $R(\text{int}) = 0.0301$ ], the final R was 0.0346 [ $I > 2\sigma(I)$ , 2889 data] and  $wR(F^2)$  was 0.0955 (all data), GOF 1.054. CCDC 1867211. From dichloromethane/pentane (70%) m.p. 247.5-248.4°C.

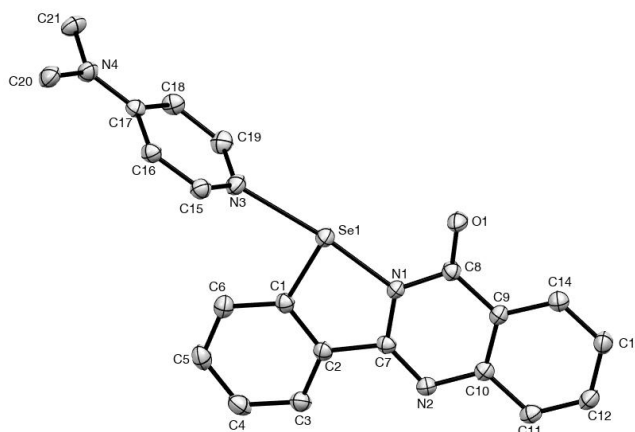

**SUPP-Figure 15.** Thermal ellipsoid plot for **3**.DMAP. Ellipsoids are at the 30% probability level.

Crystal data for **3**.DMAP.  $C_{21}H_{18}N_4OSe$ ,  $M = 421.35$ ,  $T = 100.0$  K,  $\lambda = 0.71073$  Å, Triclinic, space group  $P-1$ ,  $a = 8.8093(2)$   $b = 10.7445(2)$ ,  $c = 10.9812(2)$  Å,  $\alpha = 111.687(2)^\circ$ ,  $\beta = 109.283(2)^\circ$   $\gamma = 96.631(2)^\circ$   $V = 877.57(3)$  Å<sup>3</sup>,  $Z = 2$ ,  $D_c = 1.595$  mg  $M^{-3}$   $\mu(\text{Mo-K}\alpha) 2.159$  mm<sup>-1</sup>,  $F(000) = 428$  crystal size  $0.18 \times 0.11 \times 0.06$  mm<sup>3</sup>, 56053 reflections measured  $\theta_{\text{max}} = 41.07^\circ$ , 11273 independent reflections [ $R(\text{int}) = 0.0547$ ], the final R was 0.0358 [ $I > 2\sigma(I)$ , 8667 data] and  $wR(F^2)$  was 0.0872 (all data), GOF 1.048. CCDC 1867212. From dichloromethane/pentane (80%) m.p. 248.8-249.4°C.

## (1) Computational:

Structures were optimised at the wB97XD level of theory<sup>6</sup> using the def2TZVP basis set<sup>7</sup> as implemented in the Gaussian09 software package, and NBO calculations performed using the same<sup>8,9</sup>. Minima were verified by normal mode analysis. An ultrafine grid and tightened SCF convergence criteria were used for all calculations (`int(ultrafine)` and `scf(conver=12)`).

Structures obtained from our crystallographic studies were optimised first at the HF/6-31G(d,p) level of theory, then at  $\omega$ B97XD/Def2TZVP using tight SCF convergence criteria and an ultrafine grid. Default geometric convergence criteria were used for all structures, except 1b.DMAP.H<sub>2</sub>O, where not all the displacement criteria would not converge. Using the optimised geometries, a frequency calculation was performed to verify the nature of the stationary point, and NBO analysis was performed using the NBOv3.1 software package[1].

### 1a

Sum of electronic and zero-point Energies= -3032.219044  
Sum of electronic and thermal Energies= -3032.206520  
Sum of electronic and thermal Enthalpies= -3032.205576  
Sum of electronic and thermal Free Energies= -3032.260082

|    |    |           |             |              |
|----|----|-----------|-------------|--------------|
| 1  | Se |           |             |              |
| 2  | O  | 3.9263341 |             |              |
| 3  | N  | 1.8586549 | 21.2955737  |              |
| 4  | C  | 1.8828975 | 86.5878265  | -0.8628750   |
| 5  | C  | 1.3881097 | 127.4561030 | -179.6763426 |
| 6  | H  | 1.0823223 | 121.4057586 | 0.0558973    |
| 7  | C  | 1.3861891 | 111.3046786 | 0.3557366    |
| 8  | C  | 1.2116685 | 12.6716401  | -178.9477884 |
| 9  | C  | 1.3836164 | 118.1096321 | -179.9487653 |
| 10 | H  | 1.0827052 | 119.2295770 | 179.9460698  |
| 11 | C  | 1.4167426 | 119.5966508 | -179.8945224 |
| 12 | C  | 1.3945426 | 121.1348840 | -0.0942261   |
| 13 | H  | 1.0819348 | 119.7352290 | -179.9346331 |
| 14 | C  | 1.3811323 | 120.1640003 | 0.0631690    |
| 15 | H  | 1.0826388 | 122.0151557 | -179.9364773 |
| 16 | C  | 1.3902704 | 119.7163996 | -42.6326667  |
| 17 | H  | 1.0832734 | 119.8720860 | -2.2442198   |
| 18 | C  | 1.3909713 | 120.3931437 | 136.5063442  |
| 19 | H  | 1.0794624 | 119.7485625 | 1.5304023    |
| 20 | C  | 1.3841782 | 119.5614111 | -179.4062520 |
| 21 | H  | 1.0825031 | 119.2292200 | -179.6396056 |
| 22 | C  | 1.3853640 | 120.0575610 | 178.6109641  |
| 23 | H  | 1.0824192 | 119.4925105 | -179.8521963 |
| 24 | C  | 1.3853012 | 120.2263769 | 0.8345981    |
| 25 | H  | 1.0822405 | 120.2243031 | 179.5647760  |

### 1b

Sum of electronic and zero-point Energies= -3071.508578  
Sum of electronic and thermal Energies= -3071.494825

Sum of electronic and thermal Enthalpies= -3071.493881  
 Sum of electronic and thermal Free Energies= -3071.552123

|    |    |           |             |              |
|----|----|-----------|-------------|--------------|
| 1  | C  |           |             |              |
| 2  | C  | 1.3884792 |             |              |
| 3  | C  | 1.3873599 | 120.1916504 |              |
| 4  | C  | 1.3880803 | 121.1701378 | 0.0647332    |
| 5  | C  | 1.3836685 | 118.1460727 | 0.0476848    |
| 6  | C  | 1.3813065 | 119.1910758 | -0.1460157   |
| 7  | H  | 1.0826735 | 121.9965886 | -179.8917379 |
| 8  | H  | 1.0823187 | 121.3759976 | -179.9410190 |
| 9  | H  | 1.0827222 | 119.2274557 | 179.9561670  |
| 10 | H  | 1.0819618 | 120.1098567 | -179.9119694 |
| 11 | N  | 2.3353473 | 157.4509653 | 178.1377394  |
| 12 | C  | 1.3710777 | 36.4901344  | 3.1505603    |
| 13 | O  | 1.2159566 | 123.9196266 | 179.9724773  |
| 14 | C  | 1.4498778 | 158.9822129 | 6.9674812    |
| 15 | H  | 1.0911921 | 105.2957010 | -16.6426178  |
| 16 | H  | 1.0927417 | 109.3335904 | -132.4498080 |
| 17 | C  | 1.5087433 | 113.1000722 | 104.1532252  |
| 18 | C  | 1.3873956 | 120.9984507 | 118.8463180  |
| 19 | C  | 1.3920915 | 119.8331428 | -60.7599814  |
| 20 | C  | 1.3884690 | 120.5627134 | -179.6530508 |
| 21 | H  | 1.0844296 | 119.6383559 | 0.3364604    |
| 22 | C  | 1.3835220 | 120.3726916 | 179.5303850  |
| 23 | H  | 1.0840437 | 119.3179420 | -0.6649507   |
| 24 | C  | 1.3845340 | 119.9570058 | 0.1510732    |
| 25 | H  | 1.0826777 | 119.8722809 | 179.9574888  |
| 26 | H  | 1.0826925 | 119.8216103 | 179.8917885  |
| 27 | H  | 1.0826103 | 120.1281765 | 179.8932455  |
| 28 | Se | 1.8488122 | 80.0485587  | -179.5806233 |

### 3

Sum of electronic and zero-point Energies= -3124.499546  
 Sum of electronic and thermal Energies= -3124.486722  
 Sum of electronic and thermal Enthalpies= -3124.485778  
 Sum of electronic and thermal Free Energies= -3124.539686

|    |    |           |             |              |
|----|----|-----------|-------------|--------------|
| 1  | Se |           |             |              |
| 2  | C  | 4.0812705 |             |              |
| 3  | H  | 1.0821357 | 132.4447083 |              |
| 4  | N  | 1.8540841 | 63.8120142  | 0.0010670    |
| 5  | C  | 1.3899622 | 13.4854202  | 0.0007223    |
| 6  | C  | 1.3804554 | 105.6591521 | -179.9992538 |
| 7  | H  | 1.0818234 | 119.9829021 | -180.0000000 |
| 8  | C  | 1.3849557 | 118.7418440 | 179.9921968  |
| 9  | C  | 1.3929037 | 120.2982493 | 0.0004654    |
| 10 | C  | 2.4737014 | 141.6985423 | 179.9488400  |
| 11 | H  | 1.0820881 | 87.6780212  | -179.9503810 |

|    |   |           |             |              |
|----|---|-----------|-------------|--------------|
| 12 | N | 2.3482535 | 143.8939060 | -0.0058541   |
| 13 | O | 1.2142675 | 120.0527450 | 0.0583169    |
| 14 | C | 2.3994033 | 120.2767417 | 0.0558484    |
| 15 | H | 1.0829541 | 149.3455080 | 179.9945437  |
| 16 | C | 1.3880549 | 120.7539384 | -0.0009832   |
| 17 | H | 1.0822723 | 121.2018840 | -179.9993641 |
| 18 | C | 1.3781821 | 87.8789198  | -179.9828745 |
| 19 | C | 1.2864454 | 29.0701608  | 0.0072699    |
| 20 | C | 1.3734620 | 150.7126981 | 0.0639121    |
| 21 | H | 1.0819537 | 120.2327647 | 179.9855759  |
| 22 | C | 1.3835260 | 118.4659654 | 0.0008173    |
| 23 | H | 1.0825491 | 119.2527058 | 179.9996221  |
| 24 | C | 1.3735894 | 91.0750197  | -0.0081821   |
| 25 | H | 1.0818262 | 121.5706056 | -179.9967501 |
| 26 | C | 1.3981798 | 30.7208789  | 0.0448287    |

=====

### DABCO

Sum of electronic and zero-point Energies= -345.165427  
Sum of electronic and thermal Energies= -345.159195  
Sum of electronic and thermal Enthalpies= -345.158251  
Sum of electronic and thermal Free Energies= -345.195837

|    |   |           |             |              |
|----|---|-----------|-------------|--------------|
| 1  | C |           |             |              |
| 2  | C | 1.5555449 |             |              |
| 3  | H | 1.0921801 | 111.4299206 |              |
| 4  | H | 1.0921795 | 111.4214717 | -119.9859436 |
| 5  | H | 1.0921419 | 111.4262578 | -119.9893689 |
| 6  | H | 1.0921883 | 111.4172852 | -0.0054857   |
| 7  | C | 2.3802033 | 89.9983354  | 90.0122144   |
| 8  | H | 1.0921795 | 143.7245112 | 128.0594586  |
| 9  | H | 1.0921768 | 90.0316288  | -111.4618732 |
| 10 | C | 1.5555097 | 89.9808272  | -0.0312566   |
| 11 | H | 1.0921877 | 111.4217196 | 150.0654211  |
| 12 | H | 1.0921419 | 111.4261838 | -89.9472765  |
| 13 | C | 2.3795877 | 90.0009877  | -59.9799549  |
| 14 | H | 1.0921972 | 143.7818479 | 128.1036478  |
| 15 | H | 1.0921933 | 90.0671189  | -111.4137619 |
| 16 | C | 1.5552150 | 90.0171963  | -0.0290311   |
| 17 | H | 1.0921879 | 111.4319515 | 150.0287056  |
| 18 | H | 1.0921866 | 111.4343045 | -89.9798879  |
| 19 | N | 1.4612966 | 109.8803169 | -29.9810800  |
| 20 | N | 1.4601944 | 35.4712750  | 125.8737955  |

=====

### Quinuclidine

Sum of electronic and zero-point Energies= -329.134608  
Sum of electronic and thermal Energies= -329.128070  
Sum of electronic and thermal Enthalpies= -329.127126

Sum of electronic and thermal Free Energies= -329.164686

|    |   |           |             |              |
|----|---|-----------|-------------|--------------|
| 1  | C |           |             |              |
| 2  | C | 2.4942004 |             |              |
| 3  | C | 1.5319785 | 36.3386500  |              |
| 4  | H | 1.0917212 | 110.9547387 | -120.5417920 |
| 5  | H | 1.0917212 | 110.9547387 | 120.5417920  |
| 6  | H | 1.0924203 | 109.9029278 | -121.1968980 |
| 7  | H | 1.0924203 | 109.9029278 | 121.1968980  |
| 8  | C | 2.3841841 | 91.9673420  | -30.0195110  |
| 9  | H | 1.0917207 | 143.1805291 | 130.0149574  |
| 10 | H | 1.0917211 | 89.7839708  | -110.9598921 |
| 11 | C | 1.5319780 | 88.3699722  | -125.5833112 |
| 12 | H | 1.0924204 | 109.9029537 | -149.7608361 |
| 13 | H | 1.0924207 | 109.9029219 | 92.6329690   |
| 14 | H | 1.0905470 | 146.5036485 | 0.0000000    |
| 15 | C | 1.5319780 | 88.3699722  | 125.5833112  |
| 16 | H | 1.0924204 | 109.9029537 | 149.7608361  |
| 17 | H | 1.0924207 | 109.9029219 | -92.6329690  |
| 18 | C | 1.5530757 | 107.8932021 | 28.5639209   |
| 19 | H | 1.0917207 | 110.9547691 | 120.5417741  |
| 20 | H | 1.0917211 | 110.9547593 | -120.5417374 |
| 21 | N | 1.4590888 | 111.6406777 | 0.0000000    |

=====  
**pyridine**

Sum of electronic and zero-point Energies= -248.193946  
Sum of electronic and thermal Energies= -248.189710  
Sum of electronic and thermal Enthalpies= -248.188766  
Sum of electronic and thermal Free Energies= -248.220660

|    |   |           |             |             |
|----|---|-----------|-------------|-------------|
| 1  | C |           |             |             |
| 2  | C | 2.2704500 |             |             |
| 3  | C | 1.3869122 | 92.2781587  |             |
| 4  | C | 1.3846956 | 118.4443388 | 0.0000000   |
| 5  | C | 1.3846956 | 118.5550049 | 0.0000000   |
| 6  | H | 1.0853905 | 120.2389374 | 180.0000000 |
| 7  | H | 1.0853905 | 147.4829039 | 180.0000000 |
| 8  | H | 1.0819265 | 120.2354201 | 180.0000000 |
| 9  | H | 1.0829780 | 120.7224975 | 180.0000000 |
| 10 | H | 1.0819265 | 121.3202411 | 180.0000000 |
| 11 | N | 1.3289769 | 31.3274584  | 180.0000000 |

=====  
**DMAP**

Sum of electronic and zero-point Energies= -382.102731  
Sum of electronic and thermal Energies= -382.094169  
Sum of electronic and thermal Enthalpies= -382.093224  
Sum of electronic and thermal Free Energies= -382.136857

|    |   |           |             |              |
|----|---|-----------|-------------|--------------|
| 1  | C |           |             |              |
| 2  | C | 1.3808026 |             |              |
| 3  | C | 1.4046426 | 119.3559934 |              |
| 4  | C | 1.4046426 | 115.8748778 | 0.3767901    |
| 5  | C | 1.3808026 | 119.3559934 | -0.3767901   |
| 6  | N | 1.3300770 | 124.9302183 | 0.1548689    |
| 7  | H | 1.0859224 | 116.0346500 | 179.8300493  |
| 8  | H | 1.0798793 | 119.0283866 | 179.7943145  |
| 9  | H | 1.0798793 | 121.6155999 | 179.5710330  |
| 10 | H | 1.0859224 | 119.0350782 | -179.9323831 |
| 11 | N | 1.3652352 | 122.0625564 | -179.5885966 |
| 12 | C | 1.4437309 | 119.9057191 | -3.3849828   |
| 13 | H | 1.0957907 | 112.0576133 | -60.8670174  |
| 14 | H | 1.0939866 | 111.4702318 | 60.4399707   |
| 15 | H | 1.0872508 | 109.2621481 | 179.4103638  |
| 16 | C | 1.4437309 | 119.9057191 | -176.6517658 |
| 17 | H | 1.0872507 | 109.2621512 | -179.4104195 |
| 18 | H | 1.0939866 | 111.4702318 | -60.4399707  |
| 19 | H | 1.0957907 | 112.0576133 | 60.8670174   |

### 1a.pyridine

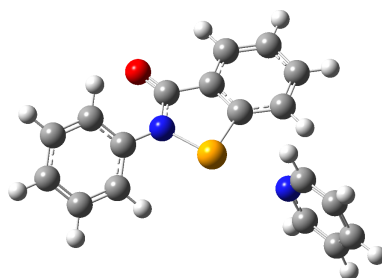

Sum of electronic and zero-point Energies= -3280.424880  
Sum of electronic and thermal Energies= -3280.406071  
Sum of electronic and thermal Enthalpies= -3280.405126  
Sum of electronic and thermal Free Energies= -3280.477861

|    |    |           |             |              |
|----|----|-----------|-------------|--------------|
| 1  | Se |           |             |              |
| 2  | O  | 3.9551727 |             |              |
| 3  | N  | 1.8819337 | 21.0604606  |              |
| 4  | C  | 1.8913099 | 85.7488412  | -1.1668389   |
| 5  | C  | 1.3895733 | 127.9538230 | -179.6368626 |
| 6  | H  | 1.0798585 | 120.8148267 | -0.1197066   |
| 7  | C  | 1.3882780 | 111.5051745 | 0.3448728    |
| 8  | C  | 1.2149392 | 12.0972319  | -178.2111474 |
| 9  | C  | 1.3837626 | 118.5024652 | 179.9682375  |
| 10 | H  | 1.0830432 | 119.1022903 | 179.9386388  |
| 11 | C  | 1.4129786 | 119.2992753 | -179.1417793 |
| 12 | C  | 1.3936862 | 121.2511494 | -0.0740989   |
| 13 | H  | 1.0821257 | 119.9211498 | -179.9436410 |
| 14 | C  | 1.3806286 | 119.8536010 | 0.0712306    |
| 15 | H  | 1.0827126 | 122.0779540 | -179.9774492 |
| 16 | C  | 1.3926316 | 120.8617636 | 138.8408193  |
| 17 | H  | 1.0791924 | 119.6337100 | 2.0189405    |
| 18 | C  | 1.3917781 | 119.6313154 | -39.9625213  |

|    |   |           |             |              |
|----|---|-----------|-------------|--------------|
| 19 | H | 1.0830340 | 119.7488008 | -2.6500954   |
| 20 | C | 1.3853918 | 120.2733766 | 178.2630119  |
| 21 | H | 1.0826761 | 119.4559940 | -179.9120670 |
| 22 | C | 1.3840847 | 119.7351919 | -178.9590771 |
| 23 | H | 1.0827430 | 119.1699945 | -179.6814353 |
| 24 | C | 1.3851516 | 120.2890245 | 0.7694628    |
| 25 | H | 1.0823495 | 120.3107241 | 179.5724280  |
| 26 | N | 2.7747786 | 176.1862272 | 11.9427787   |
| 27 | C | 1.3295429 | 118.8557489 | 87.5550336   |
| 28 | C | 1.3296664 | 120.6500075 | -109.4961739 |
| 29 | C | 1.3851635 | 122.9385348 | 163.5034645  |
| 30 | H | 1.0846405 | 116.0526372 | -16.3987233  |
| 31 | C | 1.3849906 | 122.9544827 | -163.1836103 |
| 32 | H | 1.0847100 | 116.0573191 | 16.7777113   |
| 33 | C | 1.3849837 | 118.4821337 | -0.0882708   |
| 34 | H | 1.0814967 | 120.1714230 | 179.9992543  |
| 35 | H | 1.0815144 | 120.1866838 | 179.9942150  |
| 36 | H | 1.0826250 | 120.5810362 | -179.9499932 |

### Second Order Perturbation Theory Analysis of Fock Matrix in NBO Basis

Threshold for printing: 0.50 kcal/mol  
 (Intermolecular threshold: 0.05 kcal/mol)

| Donor NBO (i)            | Acceptor NBO (j)          | E(2)<br>E(j)-E(i)<br>kcal/mol | F(i,j)<br>a.u. | a.u.  |
|--------------------------|---------------------------|-------------------------------|----------------|-------|
| =====                    |                           |                               |                |       |
| from unit 1 to unit 2    |                           |                               |                |       |
| 1. BD ( 1)Se 1 - N 3     | /555. RY*( 1) N 26        | 0.64                          | 1.86           | 0.031 |
| 2. BD ( 1)Se 1 - C 4     | /555. RY*( 1) N 26        | 0.23                          | 1.84           | 0.018 |
| 7. BD ( 1)C 4 - C 5      | /555. RY*( 1) N 26        | 0.05                          | 1.97           | 0.009 |
| 7. BD ( 1)C 4 - C 5      | /558. RY*( 4) N 26        | 0.08                          | 1.65           | 0.010 |
| 10. BD ( 1)C 5 - H 6     | /771. BD*( 2) N 26 - C 27 | 0.22                          | 0.64           | 0.012 |
| 84. LP ( 1)Se 1          | /555. RY*( 1) N 26        | 0.10                          | 1.94           | 0.013 |
| 84. LP ( 1)Se 1          | /770. BD*( 1) N 26 - C 27 | 0.42                          | 1.38           | 0.021 |
| 84. LP ( 1)Se 1          | /771. BD*( 2) N 26 - C 27 | 0.24                          | 0.82           | 0.014 |
| 84. LP ( 1)Se 1          | /772. BD*( 1) N 26 - C 28 | 0.48                          | 1.38           | 0.023 |
| 85. LP ( 2)Se 1          | /770. BD*( 1) N 26 - C 27 | 0.16                          | 0.89           | 0.011 |
| 85. LP ( 2)Se 1          | /772. BD*( 1) N 26 - C 28 | 0.17                          | 0.89           | 0.011 |
| 85. LP ( 2)Se 1          | /773. BD*( 1) C 27 - C 29 | 0.10                          | 0.90           | 0.009 |
| 85. LP ( 2)Se 1          | /775. BD*( 1) C 28 - C 31 | 0.09                          | 0.90           | 0.008 |
| from unit 2 to unit 1    |                           |                               |                |       |
| 35. BD ( 1) N 26 - C 27  | /736. BD*( 1)Se 1 - N 3   | 0.16                          | 1.11           | 0.012 |
| 36. BD ( 2) N 26 - C 27  | /225. RY*( 2) H 6         | 0.05                          | 2.84           | 0.012 |
| 36. BD ( 2) N 26 - C 27  | /736. BD*( 1)Se 1 - N 3   | 0.16                          | 0.54           | 0.009 |
| 36. BD ( 2) N 26 - C 27  | /745. BD*( 1) C 5 - H 6   | 0.16                          | 0.88           | 0.011 |
| 37. BD ( 1) N 26 - C 28  | /736. BD*( 1)Se 1 - N 3   | 0.16                          | 1.11           | 0.012 |
| 38. BD ( 1) C 27 - C 29  | /736. BD*( 1)Se 1 - N 3   | 0.14                          | 0.98           | 0.011 |
| 39. BD ( 1) C 27 - H 30  | /95. RY*( 6)Se 1          | 0.05                          | 1.88           | 0.009 |
| 40. BD ( 1) C 28 - C 31  | /736. BD*( 1)Se 1 - N 3   | 0.14                          | 0.98           | 0.011 |
| 78. CR ( 1) N 26         | /736. BD*( 1)Se 1 - N 3   | 0.07                          | 14.41          | 0.028 |
| 89. LP ( 1) N 26         | /91. RY*( 2)Se 1          | 0.81                          | 1.71           | 0.034 |
| 89. LP ( 1) N 26         | /97. RY*( 8)Se 1          | 0.10                          | 1.81           | 0.012 |
| 89. LP ( 1) N 26         | /202. RY*( 5) C 5         | 0.06                          | 2.23           | 0.011 |
| 89. LP ( 1) N 26         | /225. RY*( 2) H 6         | 0.05                          | 2.90           | 0.011 |
| 89. LP ( 1) N 26         | /736. BD*( 1)Se 1 - N 3   | 11.24                         | 0.61           | 0.075 |
| 89. LP ( 1) N 26         | /737. BD*( 1)Se 1 - C 4   | 0.58                          | 0.67           | 0.018 |
| 89. LP ( 1) N 26         | /743. BD*( 1) C 4 - C 7   | 0.28                          | 1.07           | 0.016 |
| 89. LP ( 1) N 26         | /745. BD*( 1) C 5 - H 6   | 0.28                          | 0.95           | 0.015 |
| 89. LP ( 1) N 26         | /746. BD*( 1) C 5 - C 9   | 0.23                          | 1.10           | 0.014 |
| 771. BD*( 2) N 26 - C 27 | /736. BD*( 1)Se 1 - N 3   | 0.19                          | 0.13           | 0.009 |



771. BD\*( 2) N 26 - C 27 /745. BD\*( 1) C 5 - H 6 0.09 0.47 0.013  
 776. BD\*( 2) C 28 - C 31 /747. BD\*( 2) C 5 - C 9 0.06 0.03 0.002

1a.DMAP

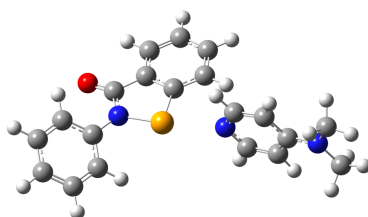

Sum of electronic and zero-point Energies= -3414.336379  
 Sum of electronic and thermal Energies= -3414.313262  
 Sum of electronic and thermal Enthalpies= -3414.312317  
 Sum of electronic and thermal Free Energies= -3414.394941

|    |    |           |             |              |
|----|----|-----------|-------------|--------------|
| 1  | Se |           |             |              |
| 2  | O  | 3.9659805 |             |              |
| 3  | N  | 1.8915810 | 20.9833163  |              |
| 4  | C  | 1.8930170 | 85.4265963  | -1.4321749   |
| 5  | C  | 1.3899136 | 127.9291698 | -179.5438729 |
| 6  | H  | 1.0796118 | 120.6891338 | -0.0975812   |
| 7  | C  | 1.3887834 | 111.6832305 | 0.4351984    |
| 8  | C  | 1.2160983 | 11.9206376  | -177.7073727 |
| 9  | C  | 1.3837447 | 118.6013184 | 179.9759402  |
| 10 | H  | 1.0831369 | 119.0751469 | 179.9479347  |
| 11 | C  | 1.4116775 | 119.2727390 | -179.0436119 |
| 12 | C  | 1.3935689 | 121.2662159 | -0.0715445   |
| 13 | H  | 1.0822139 | 119.9646430 | -179.9437657 |
| 14 | C  | 1.3805573 | 119.7853604 | 0.0629848    |
| 15 | H  | 1.0827429 | 122.0943925 | -179.9716527 |
| 16 | C  | 1.3931277 | 120.9816801 | 138.9038776  |
| 17 | H  | 1.0791992 | 119.5881381 | 2.0603959    |
| 18 | C  | 1.3922117 | 119.6145250 | -39.8427276  |
| 19 | H  | 1.0829431 | 119.7018555 | -2.6675850   |
| 20 | C  | 1.3854105 | 120.3214057 | 178.2300217  |
| 21 | H  | 1.0827598 | 119.4450435 | -179.9366060 |
| 22 | C  | 1.3840461 | 119.7963240 | -178.8959441 |
| 23 | H  | 1.0828244 | 119.1643861 | -179.6899829 |
| 24 | C  | 1.3851797 | 120.3121649 | 0.7442392    |
| 25 | H  | 1.0824050 | 120.3304663 | 179.5640581  |
| 26 | N  | 2.6852413 | 175.6217105 | 11.2755927   |
| 27 | C  | 1.3316321 | 120.0666523 | 86.0963373   |
| 28 | C  | 1.3315949 | 121.6308369 | -109.2712046 |
| 29 | C  | 1.3769907 | 124.2186326 | 165.6331767  |
| 30 | H  | 1.0850667 | 115.9290139 | -14.3204883  |
| 31 | C  | 1.3770286 | 124.2370210 | -165.3755868 |
| 32 | H  | 1.0851237 | 115.9423342 | 14.6399495   |
| 33 | C  | 1.4072881 | 119.4631558 | -0.1101593   |
| 34 | H  | 1.0793761 | 118.9138594 | -179.9619088 |
| 35 | H  | 1.0793592 | 118.8964587 | 179.9447537  |
| 36 | N  | 1.3591764 | 121.9735757 | 179.9799206  |
| 37 | C  | 1.4457995 | 120.0444776 | 0.6013427    |
| 38 | H  | 1.0944349 | 111.7086568 | 60.7127023   |
| 39 | H  | 1.0867749 | 109.2298868 | -179.9250372 |
| 40 | H  | 1.0941991 | 111.6222919 | -60.6788541  |
| 41 | C  | 1.4457533 | 120.0634469 | 179.4880279  |

|    |   |           |             |             |
|----|---|-----------|-------------|-------------|
| 42 | H | 1.0941836 | 111.6111074 | 60.4380835  |
| 43 | H | 1.0867720 | 109.2309146 | 179.6679844 |
| 44 | H | 1.0944827 | 111.7280469 | -60.9560407 |

Second Order Perturbation Theory Analysis of Fock Matrix in NBO Basis

Threshold for printing: 0.50 kcal/mol  
 (Intermolecular threshold: 0.05 kcal/mol)

| Donor NBO (i)            | Acceptor NBO (j)          | E(2)<br>kcal/mol | E(j)-E(i)<br>a.u. | F(i,j)<br>a.u. |
|--------------------------|---------------------------|------------------|-------------------|----------------|
| =====                    |                           |                  |                   |                |
| from unit 1 to unit 2    |                           |                  |                   |                |
| 1. BD ( 1)Se 1 - N 3     | /568. RY*( 1) N 26        | 0.78             | 1.85              | 0.034          |
| 1. BD ( 1)Se 1 - N 3     | /570. RY*( 3) N 26        | 0.09             | 1.47              | 0.010          |
| 2. BD ( 1)Se 1 - C 4     | /568. RY*( 1) N 26        | 0.29             | 1.83              | 0.021          |
| 2. BD ( 1)Se 1 - C 4     | /887. BD*( 1) N 26 - C 28 | 0.05             | 1.27              | 0.007          |
| 7. BD ( 1) C 4 - C 5     | /568. RY*( 1) N 26        | 0.06             | 1.97              | 0.009          |
| 7. BD ( 1) C 4 - C 5     | /570. RY*( 3) N 26        | 0.07             | 1.60              | 0.010          |
| 10. BD ( 1) C 5 - H 6    | /100. LP ( 2) N 26        | 0.51             | 0.37              | 0.020          |
| 58. CR ( 3)Se 1          | /886. BD*( 1) N 26 - C 27 | 0.06             | 11.37             | 0.024          |
| 58. CR ( 3)Se 1          | /887. BD*( 1) N 26 - C 28 | 0.07             | 11.37             | 0.025          |
| 94. LP ( 1)Se 1          | /100. LP ( 2) N 26        | 0.36             | 0.56              | 0.021          |
| 94. LP ( 1)Se 1          | /568. RY*( 1) N 26        | 0.13             | 1.94              | 0.014          |
| 94. LP ( 1)Se 1          | /886. BD*( 1) N 26 - C 27 | 0.57             | 1.38              | 0.025          |
| 94. LP ( 1)Se 1          | /887. BD*( 1) N 26 - C 28 | 0.62             | 1.38              | 0.026          |
| 94. LP ( 1)Se 1          | /890. BD*( 1) C 27 - H 30 | 0.05             | 1.25              | 0.007          |
| 94. LP ( 1)Se 1          | /893. BD*( 1) C 28 - H 32 | 0.05             | 1.25              | 0.007          |
| 95. LP ( 2)Se 1          | /886. BD*( 1) N 26 - C 27 | 0.23             | 0.89              | 0.013          |
| 95. LP ( 2)Se 1          | /887. BD*( 1) N 26 - C 28 | 0.24             | 0.89              | 0.013          |
| 95. LP ( 2)Se 1          | /888. BD*( 1) C 27 - C 29 | 0.12             | 0.92              | 0.010          |
| 95. LP ( 2)Se 1          | /891. BD*( 1) C 28 - C 31 | 0.11             | 0.92              | 0.009          |
| from unit 2 to unit 1    |                           |                  |                   |                |
| 35. BD ( 1) N 26 - C 27  | /852. BD*( 1)Se 1 - N 3   | 0.24             | 1.09              | 0.015          |
| 36. BD ( 1) N 26 - C 28  | /852. BD*( 1)Se 1 - N 3   | 0.23             | 1.09              | 0.014          |
| 37. BD ( 1) C 27 - C 29  | /852. BD*( 1)Se 1 - N 3   | 0.17             | 0.98              | 0.012          |
| 40. BD ( 1) C 28 - C 31  | /852. BD*( 1)Se 1 - N 3   | 0.17             | 0.98              | 0.012          |
| 85. CR ( 1) N 26         | /852. BD*( 1)Se 1 - N 3   | 0.11             | 14.39             | 0.036          |
| 99. LP ( 1) N 26         | /103. RY*( 1)Se 1         | 0.19             | 1.33              | 0.015          |
| 99. LP ( 1) N 26         | /104. RY*( 2)Se 1         | 0.99             | 1.65              | 0.037          |
| 99. LP ( 1) N 26         | /110. RY*( 8)Se 1         | 0.11             | 1.78              | 0.013          |
| 99. LP ( 1) N 26         | /118. RY*( 16)Se 1        | 0.06             | 2.50              | 0.011          |
| 99. LP ( 1) N 26         | /215. RY*( 5) C 5         | 0.09             | 2.23              | 0.013          |
| 99. LP ( 1) N 26         | /237. RY*( 1) H 6         | 0.06             | 1.29              | 0.008          |
| 99. LP ( 1) N 26         | /238. RY*( 2) H 6         | 0.06             | 2.91              | 0.012          |
| 99. LP ( 1) N 26         | /852. BD*( 1)Se 1 - N 3   | 15.45            | 0.60              | 0.087          |
| 99. LP ( 1) N 26         | /853. BD*( 1)Se 1 - C 4   | 0.89             | 0.66              | 0.022          |
| 99. LP ( 1) N 26         | /859. BD*( 1) C 4 - C 7   | 0.35             | 1.06              | 0.018          |
| 99. LP ( 1) N 26         | /861. BD*( 1) C 5 - H 6   | 0.25             | 0.95              | 0.014          |
| 99. LP ( 1) N 26         | /862. BD*( 1) C 5 - C 9   | 0.25             | 1.09              | 0.015          |
| 100. LP ( 2) N 26        | /852. BD*( 1)Se 1 - N 3   | 0.40             | 0.39              | 0.013          |
| 100. LP ( 2) N 26        | /861. BD*( 1) C 5 - H 6   | 0.39             | 0.73              | 0.019          |
| 100. LP ( 2) N 26        | /862. BD*( 1) C 5 - C 9   | 0.09             | 0.87              | 0.010          |
| 889. BD*( 2) C 27 - C 29 | /863. BD*( 2) C 5 - C 9   | 0.11             | 0.02              | 0.002          |
| 892. BD*( 2) C 28 - C 31 | /863. BD*( 2) C 5 - C 9   | 0.11             | 0.02              | 0.002          |
| =====                    |                           |                  |                   |                |

1a.DABCO

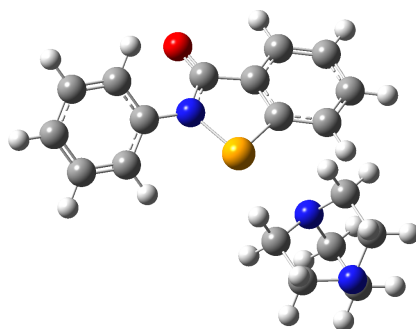

Sum of electronic and zero-point Energies= -3377.398123  
 Sum of electronic and thermal Energies= -3377.377456  
 Sum of electronic and thermal Enthalpies= -3377.376512  
 Sum of electronic and thermal Free Energies= -3377.451475

|    |    |           |             |              |
|----|----|-----------|-------------|--------------|
| 1  | Se |           |             |              |
| 2  | O  | 3.9564238 |             |              |
| 3  | N  | 1.8827484 | 21.0268868  |              |
| 4  | C  | 1.8876172 | 85.6374986  | -1.9172826   |
| 5  | C  | 1.3883521 | 127.7038640 | -179.2318203 |
| 6  | H  | 1.0790971 | 120.8647744 | 0.1164292    |
| 7  | C  | 1.3878659 | 111.7576556 | 0.6846769    |
| 8  | C  | 1.2146229 | 12.1093275  | -176.8719389 |
| 9  | C  | 1.3834638 | 118.6508049 | -179.9758275 |
| 10 | H  | 1.0829773 | 119.2298227 | 179.9598326  |
| 11 | C  | 1.4129875 | 119.1839545 | -179.1132064 |
| 12 | C  | 1.3936829 | 121.0987590 | -0.1114112   |
| 13 | H  | 1.0820431 | 119.8889934 | -179.9271627 |
| 14 | C  | 1.3809481 | 119.8962159 | 0.0148691    |
| 15 | H  | 1.0827041 | 122.0377607 | -179.8812354 |
| 16 | C  | 1.3923305 | 120.8537892 | 137.3117000  |
| 17 | H  | 1.0793244 | 119.6424615 | 1.9869163    |
| 18 | C  | 1.3917125 | 119.5989823 | -41.4826781  |
| 19 | H  | 1.0830547 | 119.7089145 | -2.7824551   |
| 20 | C  | 1.3854778 | 120.2546974 | 178.2419924  |
| 21 | H  | 1.0826802 | 119.4884544 | -179.9784184 |
| 22 | C  | 1.3841390 | 119.7271720 | -178.9504145 |
| 23 | H  | 1.0826922 | 119.1932912 | -179.6586237 |
| 24 | C  | 1.3852327 | 120.2676530 | 0.7751499    |
| 25 | H  | 1.0823229 | 120.2937644 | 179.5385258  |
| 26 | C  | 3.2317606 | 151.5591895 | 175.4654468  |
| 27 | C  | 2.3847340 | 81.0668739  | -146.3940480 |
| 28 | C  | 2.3843851 | 81.7323015  | 152.5833573  |
| 29 | C  | 1.5526672 | 169.8942713 | -171.3187599 |
| 30 | H  | 1.0917836 | 72.8112667  | -53.5921468  |
| 31 | H  | 1.0920262 | 74.4235800  | 60.7370475   |
| 32 | H  | 1.0913643 | 144.1797106 | -46.7518749  |
| 33 | H  | 1.0912708 | 89.5178543  | 73.0345059   |
| 34 | C  | 1.5544187 | 89.9700282  | -175.0579347 |
| 35 | C  | 1.5543871 | 89.6533779  | 174.4964083  |
| 36 | H  | 1.0913871 | 144.2012297 | 46.9325482   |
| 37 | H  | 1.0913301 | 89.9577322  | -73.5877917  |

|    |   |           |             |              |
|----|---|-----------|-------------|--------------|
| 38 | H | 1.0914330 | 111.1883736 | 114.0694135  |
| 39 | H | 1.0914658 | 111.2245067 | -126.1845480 |
| 40 | H | 1.0915645 | 111.2018495 | 149.5092463  |
| 41 | H | 1.0914525 | 111.2062076 | -90.7575661  |
| 42 | H | 1.0915519 | 111.1906186 | -150.5534244 |
| 43 | H | 1.0914944 | 111.2139964 | 89.7178781   |
| 44 | N | 1.4660130 | 35.6370257  | 48.5661257   |
| 45 | N | 1.4596046 | 109.9951503 | -6.0190797   |

Second Order Perturbation Theory Analysis of Fock Matrix in NBO Basis

Threshold for printing: 0.50 kcal/mol

(Intermolecular threshold: 0.05 kcal/mol)

| Donor NBO (i)          | Acceptor NBO (j)          | E(2)<br>kcal/mol | E(j)-E(i)<br>a.u. | F(i,j)<br>a.u. |
|------------------------|---------------------------|------------------|-------------------|----------------|
| =====                  |                           |                  |                   |                |
| from unit 1 to unit 2  |                           |                  |                   |                |
| 1. BD ( 1)Se 1 - N 3   | /781. RY*( 1) N 44        | 0.69             | 1.73              | 0.031          |
| 1. BD ( 1)Se 1 - N 3   | /783. RY*( 3) N 44        | 0.06             | 2.36              | 0.011          |
| 2. BD ( 1)Se 1 - C 4   | /781. RY*( 1) N 44        | 0.25             | 1.72              | 0.019          |
| 10. BD ( 1)C 5 - H 6   | /870. BD*( 1) C 26 - N 44 | 0.13             | 1.02              | 0.010          |
| 10. BD ( 1)C 5 - H 6   | /871. BD*( 1) C 27 - H 32 | 0.08             | 1.06              | 0.008          |
| 10. BD ( 1)C 5 - H 6   | /873. BD*( 1) C 27 - C 34 | 0.06             | 1.01              | 0.007          |
| 10. BD ( 1)C 5 - H 6   | /875. BD*( 1) C 28 - C 35 | 0.06             | 1.01              | 0.007          |
| 10. BD ( 1)C 5 - H 6   | /876. BD*( 1) C 28 - H 36 | 0.09             | 1.05              | 0.009          |
| 93. LP ( 1)Se 1        | /781. RY*( 1) N 44        | 0.06             | 1.82              | 0.009          |
| 93. LP ( 1)Se 1        | /867. BD*( 1) C 26 - C 29 | 0.79             | 1.18              | 0.028          |
| 93. LP ( 1)Se 1        | /874. BD*( 1) C 27 - N 44 | 0.45             | 1.19              | 0.021          |
| 93. LP ( 1)Se 1        | /878. BD*( 1) C 28 - N 44 | 0.48             | 1.19              | 0.021          |
| 94. LP ( 2)Se 1        | /868. BD*( 1) C 26 - H 30 | 0.08             | 0.75              | 0.007          |
| 94. LP ( 2)Se 1        | /869. BD*( 1) C 26 - H 31 | 0.06             | 0.74              | 0.006          |
| 94. LP ( 2)Se 1        | /873. BD*( 1) C 27 - C 34 | 0.10             | 0.69              | 0.008          |
| 94. LP ( 2)Se 1        | /874. BD*( 1) C 27 - N 44 | 0.15             | 0.71              | 0.009          |
| 94. LP ( 2)Se 1        | /875. BD*( 1) C 28 - C 35 | 0.10             | 0.69              | 0.007          |
| 94. LP ( 2)Se 1        | /878. BD*( 1) C 28 - N 44 | 0.17             | 0.71              | 0.010          |
| from unit 2 to unit 1  |                           |                  |                   |                |
| 36. BD ( 1)C 26 - H 30 | /100. RY*( 1)Se 1         | 0.08             | 1.39              | 0.009          |
| 36. BD ( 1)C 26 - H 30 | /103. RY*( 4)Se 1         | 0.13             | 1.74              | 0.013          |
| 36. BD ( 1)C 26 - H 30 | /833. BD*( 1)Se 1 - N 3   | 0.08             | 0.75              | 0.007          |
| 36. BD ( 1)C 26 - H 30 | /834. BD*( 1)Se 1 - C 4   | 0.11             | 0.80              | 0.008          |
| 37. BD ( 1)C 26 - H 31 | /103. RY*( 4)Se 1         | 0.12             | 1.74              | 0.013          |
| 37. BD ( 1)C 26 - H 31 | /833. BD*( 1)Se 1 - N 3   | 0.08             | 0.75              | 0.007          |
| 37. BD ( 1)C 26 - H 31 | /834. BD*( 1)Se 1 - C 4   | 0.09             | 0.80              | 0.008          |
| 38. BD ( 1)C 26 - N 44 | /833. BD*( 1)Se 1 - N 3   | 0.15             | 0.95              | 0.011          |
| 39. BD ( 1)C 27 - H 32 | /234. RY*( 1) H 6         | 0.20             | 1.57              | 0.016          |
| 39. BD ( 1)C 27 - H 32 | /842. BD*( 1) C 5 - H 6   | 0.25             | 1.09              | 0.015          |
| 40. BD ( 1)C 27 - H 33 | /104. RY*( 5)Se 1         | 0.08             | 1.58              | 0.010          |
| 40. BD ( 1)C 27 - H 33 | /105. RY*( 6)Se 1         | 0.06             | 2.12              | 0.010          |
| 40. BD ( 1)C 27 - H 33 | /106. RY*( 7)Se 1         | 0.07             | 2.02              | 0.011          |
| 41. BD ( 1)C 27 - C 34 | /833. BD*( 1)Se 1 - N 3   | 0.10             | 0.84              | 0.008          |
| 42. BD ( 1)C 27 - N 44 | /833. BD*( 1)Se 1 - N 3   | 0.08             | 0.95              | 0.008          |
| 42. BD ( 1)C 27 - N 44 | /842. BD*( 1) C 5 - H 6   | 0.05             | 1.29              | 0.007          |
| 43. BD ( 1)C 28 - C 35 | /833. BD*( 1)Se 1 - N 3   | 0.10             | 0.84              | 0.008          |
| 44. BD ( 1)C 28 - H 36 | /234. RY*( 1) H 6         | 0.25             | 1.57              | 0.018          |
| 44. BD ( 1)C 28 - H 36 | /842. BD*( 1) C 5 - H 6   | 0.33             | 1.09              | 0.017          |
| 45. BD ( 1)C 28 - H 37 | /104. RY*( 5)Se 1         | 0.06             | 1.58              | 0.009          |
| 45. BD ( 1)C 28 - H 37 | /105. RY*( 6)Se 1         | 0.07             | 2.12              | 0.011          |
| 45. BD ( 1)C 28 - H 37 | /108. RY*( 9)Se 1         | 0.06             | 2.35              | 0.011          |
| 46. BD ( 1)C 28 - N 44 | /833. BD*( 1)Se 1 - N 3   | 0.08             | 0.95              | 0.008          |
| 46. BD ( 1)C 28 - N 44 | /842. BD*( 1) C 5 - H 6   | 0.06             | 1.29              | 0.008          |

|                  |                         |      |       |       |
|------------------|-------------------------|------|-------|-------|
| 91. CR ( 1) N 44 | /833. BD*( 1)Se 1 - N 3 | 0.06 | 14.43 | 0.026 |
| 98. LP ( 1) N 44 | /100. RY*( 1)Se 1       | 0.08 | 1.19  | 0.009 |
| 98. LP ( 1) N 44 | /101. RY*( 2)Se 1       | 0.99 | 1.47  | 0.035 |
| 98. LP ( 1) N 44 | /103. RY*( 4)Se 1       | 0.06 | 1.55  | 0.009 |
| 98. LP ( 1) N 44 | /104. RY*( 5)Se 1       | 0.05 | 1.38  | 0.008 |
| 98. LP ( 1) N 44 | /106. RY*( 7)Se 1       | 0.07 | 1.82  | 0.010 |
| 98. LP ( 1) N 44 | /110. RY*( 11)Se 1      | 0.07 | 1.70  | 0.010 |
| 98. LP ( 1) N 44 | /115. RY*( 16)Se 1      | 0.07 | 2.73  | 0.013 |
| 98. LP ( 1) N 44 | /833. BD*( 1)Se 1 - N 3 | 9.58 | 0.55  | 0.066 |
| 98. LP ( 1) N 44 | /834. BD*( 1)Se 1 - C 4 | 0.72 | 0.61  | 0.019 |
| 98. LP ( 1) N 44 | /840. BD*( 1)C 4 - C 7  | 0.14 | 1.01  | 0.011 |
| 98. LP ( 1) N 44 | /843. BD*( 1)C 5 - C 9  | 0.07 | 1.03  | 0.008 |

## 1a.quinuclidine

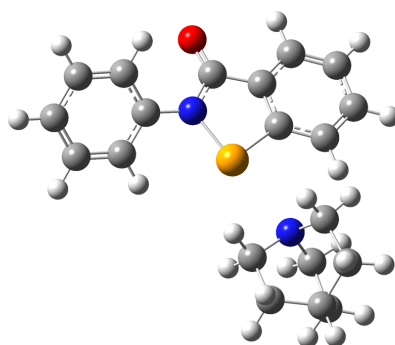

Sum of electronic and zero-point Energies= -3361.367781  
Sum of electronic and thermal Energies= -3361.346903  
Sum of electronic and thermal Enthalpies= -3361.345959  
Sum of electronic and thermal Free Energies= -3361.421089

|    |    |           |             |              |
|----|----|-----------|-------------|--------------|
| 1  | Se |           |             |              |
| 2  | O  | 3.9585573 |             |              |
| 3  | N  | 1.8847897 | 21.0234737  |              |
| 4  | C  | 1.8876581 | 85.5795207  | -2.2531818   |
| 5  | C  | 1.3883527 | 127.6875975 | -179.0092638 |
| 6  | H  | 1.0790357 | 120.8479720 | 0.2973914    |
| 7  | C  | 1.3879752 | 111.7978252 | 0.8539788    |
| 8  | C  | 1.2149130 | 12.0663076  | -176.2636838 |
| 9  | C  | 1.3834555 | 118.6671509 | -179.9192945 |
| 10 | H  | 1.0829912 | 119.2220094 | 179.9602690  |
| 11 | C  | 1.4126380 | 119.1361146 | -178.9688768 |
| 12 | C  | 1.3936717 | 121.1012305 | -0.1437456   |
| 13 | H  | 1.0820633 | 119.8958861 | -179.9301380 |
| 14 | C  | 1.3809471 | 119.8850517 | -0.0372151   |
| 15 | H  | 1.0827134 | 122.0416434 | -179.8107492 |
| 16 | C  | 1.3925271 | 120.9070090 | 137.5848597  |
| 17 | H  | 1.0792815 | 119.6336740 | 2.0493834    |
| 18 | C  | 1.3918649 | 119.5759146 | -41.1577701  |
| 19 | H  | 1.0830423 | 119.7090272 | -2.8086007   |
| 20 | C  | 1.3854623 | 120.2707793 | 178.1976196  |
| 21 | H  | 1.0826965 | 119.4778468 | -179.9736850 |
| 22 | C  | 1.3841350 | 119.7372849 | -178.8944278 |
| 23 | H  | 1.0827169 | 119.1834757 | -179.6678662 |
| 24 | C  | 1.3852240 | 120.2762287 | 0.7666040    |
| 25 | H  | 1.0823361 | 120.3022756 | 179.5440087  |
| 26 | C  | 3.2227541 | 151.4398759 | 175.3667782  |
| 27 | C  | 2.3900331 | 79.7191056  | -143.4421273 |
| 28 | C  | 2.3887707 | 82.3239914  | 155.5075620  |

|    |   |           |             |              |
|----|---|-----------|-------------|--------------|
| 29 | C | 1.5475413 | 169.1360960 | -134.5646652 |
| 30 | H | 1.0916504 | 67.9750864  | -46.7133345  |
| 31 | H | 1.0917801 | 78.8524337  | 67.0715294   |
| 32 | H | 1.0910270 | 143.5396344 | -40.0279818  |
| 33 | H | 1.0911196 | 86.9343155  | 74.6252048   |
| 34 | C | 1.5489418 | 93.7153216  | -174.0720740 |
| 35 | C | 1.5491044 | 89.4357762  | 177.1166810  |
| 36 | H | 1.0912057 | 143.4368704 | 51.8895836   |
| 37 | H | 1.0910023 | 92.3291049  | -71.2784560  |
| 38 | C | 1.5304627 | 107.9792474 | -44.8972342  |
| 39 | H | 1.0920750 | 110.8278362 | 75.4907062   |
| 40 | H | 1.0915274 | 110.7027964 | -165.7869388 |
| 41 | H | 1.0922743 | 110.8395917 | 144.1120862  |
| 42 | H | 1.0915266 | 110.7150502 | -97.1749576  |
| 43 | H | 1.0916104 | 110.6961002 | -156.9414957 |
| 44 | H | 1.0921367 | 110.8458465 | 84.3463784   |
| 45 | H | 1.0904117 | 110.3195158 | -175.6801394 |
| 46 | N | 1.4659554 | 35.4728577  | 47.2128401   |

### Second Order Perturbation Theory Analysis of Fock Matrix in NBO Basis

Threshold for printing: 0.50 kcal/mol

(Intermolecular threshold: 0.05 kcal/mol)

| Donor NBO (i)          | Acceptor NBO (j)         | E(2)<br>E(j)-E(i)<br>kcal/mol | F(i,j)<br>a.u. | F(i,j)<br>a.u. |
|------------------------|--------------------------|-------------------------------|----------------|----------------|
| =====                  |                          |                               |                |                |
| from unit 1 to unit 2  |                          |                               |                |                |
| 1. BD ( 1)Se 1 - N 3   | /812. RY*( 1)N 46        | 0.72                          | 1.73           | 0.032          |
| 2. BD ( 1)Se 1 - C 4   | /812. RY*( 1)N 46        | 0.26                          | 1.71           | 0.019          |
| 10. BD ( 1)C 5 - H 6   | /875. BD*( 1)C 26 - N 46 | 0.13                          | 1.02           | 0.010          |
| 10. BD ( 1)C 5 - H 6   | /876. BD*( 1)C 27 - H 32 | 0.07                          | 1.06           | 0.008          |
| 10. BD ( 1)C 5 - H 6   | /880. BD*( 1)C 28 - C 35 | 0.10                          | 1.02           | 0.009          |
| 10. BD ( 1)C 5 - H 6   | /881. BD*( 1)C 28 - H 36 | 0.10                          | 1.06           | 0.009          |
| 94. LP ( 1)Se 1        | /812. RY*( 1)N 46        | 0.06                          | 1.82           | 0.009          |
| 94. LP ( 1)Se 1        | /872. BD*( 1)C 26 - C 29 | 0.82                          | 1.20           | 0.028          |
| 94. LP ( 1)Se 1        | /879. BD*( 1)C 27 - N 46 | 0.39                          | 1.20           | 0.019          |
| 94. LP ( 1)Se 1        | /883. BD*( 1)C 28 - N 46 | 0.54                          | 1.20           | 0.023          |
| 95. LP ( 2)Se 1        | /873. BD*( 1)C 26 - H 30 | 0.14                          | 0.75           | 0.009          |
| 95. LP ( 2)Se 1        | /878. BD*( 1)C 27 - C 34 | 0.14                          | 0.71           | 0.009          |
| 95. LP ( 2)Se 1        | /879. BD*( 1)C 27 - N 46 | 0.14                          | 0.71           | 0.009          |
| 95. LP ( 2)Se 1        | /880. BD*( 1)C 28 - C 35 | 0.08                          | 0.71           | 0.007          |
| 95. LP ( 2)Se 1        | /883. BD*( 1)C 28 - N 46 | 0.18                          | 0.71           | 0.010          |
| from unit 2 to unit 1  |                          |                               |                |                |
| 36. BD ( 1)C 26 - H 30 | /100. RY*( 1)Se 1        | 0.08                          | 1.41           | 0.009          |
| 36. BD ( 1)C 26 - H 30 | /103. RY*( 4)Se 1        | 0.18                          | 1.70           | 0.016          |
| 36. BD ( 1)C 26 - H 30 | /838. BD*( 1)Se 1 - N 3  | 0.11                          | 0.74           | 0.008          |
| 36. BD ( 1)C 26 - H 30 | /839. BD*( 1)Se 1 - C 4  | 0.18                          | 0.80           | 0.011          |
| 37. BD ( 1)C 26 - H 31 | /103. RY*( 4)Se 1        | 0.10                          | 1.70           | 0.012          |
| 37. BD ( 1)C 26 - H 31 | /106. RY*( 7)Se 1        | 0.05                          | 2.01           | 0.009          |
| 37. BD ( 1)C 26 - H 31 | /838. BD*( 1)Se 1 - N 3  | 0.06                          | 0.74           | 0.006          |
| 37. BD ( 1)C 26 - H 31 | /839. BD*( 1)Se 1 - C 4  | 0.05                          | 0.80           | 0.006          |
| 38. BD ( 1)C 26 - N 46 | /838. BD*( 1)Se 1 - N 3  | 0.15                          | 0.95           | 0.011          |
| 39. BD ( 1)C 27 - H 32 | /234. RY*( 1)H 6         | 0.16                          | 1.57           | 0.014          |
| 39. BD ( 1)C 27 - H 32 | /847. BD*( 1)C 5 - H 6   | 0.18                          | 1.08           | 0.012          |
| 39. BD ( 1)C 27 - H 32 | /849. BD*( 2)C 5 - C 9   | 0.06                          | 0.67           | 0.006          |
| 40. BD ( 1)C 27 - H 33 | /104. RY*( 5)Se 1        | 0.08                          | 1.68           | 0.010          |
| 40. BD ( 1)C 27 - H 33 | /105. RY*( 6)Se 1        | 0.07                          | 2.04           | 0.011          |
| 40. BD ( 1)C 27 - H 33 | /106. RY*( 7)Se 1        | 0.09                          | 2.01           | 0.012          |
| 41. BD ( 1)C 27 - C 34 | /838. BD*( 1)Se 1 - N 3  | 0.09                          | 0.84           | 0.008          |
| 42. BD ( 1)C 27 - N 46 | /838. BD*( 1)Se 1 - N 3  | 0.09                          | 0.95           | 0.009          |

|                         |                         |       |       |       |
|-------------------------|-------------------------|-------|-------|-------|
| 43. BD ( 1) C 28 - C 35 | /838. BD*( 1)Se 1 - N 3 | 0.10  | 0.84  | 0.008 |
| 44. BD ( 1) C 28 - H 36 | /234. RY*( 1)H 6        | 0.30  | 1.57  | 0.019 |
| 44. BD ( 1) C 28 - H 36 | /847. BD*( 1)C 5 - H 6  | 0.44  | 1.08  | 0.020 |
| 45. BD ( 1) C 28 - H 37 | /104. RY*( 5)Se 1       | 0.05  | 1.68  | 0.009 |
| 45. BD ( 1) C 28 - H 37 | /105. RY*( 6)Se 1       | 0.09  | 2.04  | 0.012 |
| 45. BD ( 1) C 28 - H 37 | /107. RY*( 8)Se 1       | 0.06  | 2.13  | 0.010 |
| 46. BD ( 1) C 28 - N 46 | /838. BD*( 1)Se 1 - N 3 | 0.08  | 0.95  | 0.008 |
| 46. BD ( 1) C 28 - N 46 | /847. BD*( 1)C 5 - H 6  | 0.07  | 1.29  | 0.009 |
| 93. CR ( 1) N 46        | /838. BD*( 1)Se 1 - N 3 | 0.06  | 14.42 | 0.027 |
| 99. LP ( 1) N 46        | /100. RY*( 1)Se 1       | 0.18  | 1.21  | 0.014 |
| 99. LP ( 1) N 46        | /101. RY*( 2)Se 1       | 0.94  | 1.47  | 0.034 |
| 99. LP ( 1) N 46        | /103. RY*( 4)Se 1       | 0.06  | 1.50  | 0.009 |
| 99. LP ( 1) N 46        | /106. RY*( 7)Se 1       | 0.07  | 1.81  | 0.010 |
| 99. LP ( 1) N 46        | /110. RY*( 11)Se 1      | 0.06  | 1.88  | 0.010 |
| 99. LP ( 1) N 46        | /116. RY*( 17)Se 1      | 0.06  | 2.76  | 0.012 |
| 99. LP ( 1) N 46        | /838. BD*( 1)Se 1 - N 3 | 10.11 | 0.54  | 0.067 |
| 99. LP ( 1) N 46        | /839. BD*( 1)Se 1 - C 4 | 0.76  | 0.60  | 0.020 |
| 99. LP ( 1) N 46        | /845. BD*( 1)C 4 - C 7  | 0.14  | 1.00  | 0.011 |
| 99. LP ( 1) N 46        | /848. BD*( 1)C 5 - C 9  | 0.07  | 1.03  | 0.008 |

## 1b.pyridine

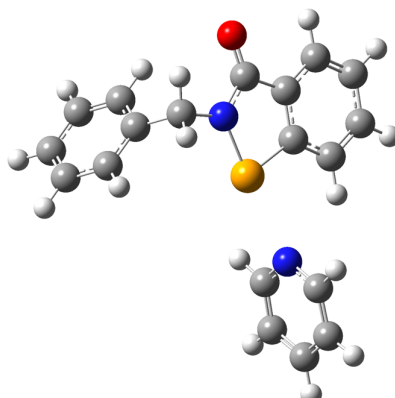

Sum of electronic and zero-point Energies= -3319.713802  
Sum of electronic and thermal Energies= -3319.693712  
Sum of electronic and thermal Enthalpies= -3319.692767  
Sum of electronic and thermal Free Energies= -3319.769696

|    |   |           |             |              |
|----|---|-----------|-------------|--------------|
| 1  | O |           |             |              |
| 2  | N | 2.2873562 |             |              |
| 3  | C | 2.5506623 | 95.5093419  |              |
| 4  | C | 1.3893855 | 174.7226394 | 173.8096095  |
| 5  | H | 1.0800564 | 120.7639763 | 8.3037486    |
| 6  | C | 1.3896179 | 64.6683257  | 1.6439913    |
| 7  | C | 1.4479618 | 96.0274283  | -178.5274035 |
| 8  | H | 1.0914637 | 105.8435910 | -16.5933680  |
| 9  | H | 1.0929702 | 109.2840874 | -132.6690412 |
| 10 | C | 1.2193930 | 29.3764399  | -178.6152959 |
| 11 | C | 1.3838154 | 118.4834662 | -171.7745820 |
| 12 | H | 1.0830616 | 119.1159836 | 179.9645153  |
| 13 | C | 1.5097880 | 113.1236501 | 104.2247606  |
| 14 | C | 1.3938550 | 121.2571604 | -0.0730922   |
| 15 | H | 1.0821706 | 119.9000386 | -179.9574391 |
| 16 | C | 1.3809053 | 119.8857438 | 0.0102732    |
| 17 | H | 1.0827649 | 122.0576226 | -179.8725106 |
| 18 | C | 1.3874091 | 121.1107362 | 118.8333959  |
| 19 | H | 1.0844699 | 119.5789242 | 0.2172248    |

|    |    |           |             |              |
|----|----|-----------|-------------|--------------|
| 20 | C  | 1.3922827 | 119.8013127 | -60.7804692  |
| 21 | H  | 1.0840223 | 119.2045880 | -0.6693524   |
| 22 | C  | 1.3837536 | 120.3960997 | 179.5626839  |
| 23 | H  | 1.0828500 | 119.7925549 | 179.8480237  |
| 24 | C  | 1.3885530 | 120.6305296 | -179.6784822 |
| 25 | H  | 1.0828626 | 119.8760846 | 179.9760548  |
| 26 | C  | 1.3846525 | 119.9621317 | 0.1467390    |
| 27 | H  | 1.0827530 | 120.1540472 | 179.9573434  |
| 28 | Se | 1.8661094 | 143.1206429 | -4.7919762   |
| 29 | N  | 2.8081066 | 175.7518337 | -12.4614980  |
| 30 | C  | 1.3294958 | 122.7123448 | 115.7156880  |
| 31 | C  | 1.3295854 | 116.6379334 | -82.1609029  |
| 32 | C  | 1.3851991 | 122.9996051 | 161.9862884  |
| 33 | H  | 1.0847336 | 116.0733309 | -17.9660900  |
| 34 | C  | 1.3852260 | 122.9715030 | -163.1213346 |
| 35 | H  | 1.0847542 | 116.0188375 | 16.7348808   |
| 36 | C  | 1.3849819 | 118.4855597 | 0.1114371    |
| 37 | H  | 1.0815596 | 120.2000014 | -179.9730892 |
| 38 | H  | 1.0815280 | 120.1718040 | -179.9871179 |
| 39 | H  | 1.0826581 | 120.5924592 | 179.9435308  |

### Second Order Perturbation Theory Analysis of Fock Matrix in NBO Basis

Threshold for printing: 0.50 kcal/mol  
(Intermolecular threshold: 0.05 kcal/mol)

| Donor NBO (i)            | Acceptor NBO (j)          | E(2)<br>kcal/mol | E(j)-E(i)<br>a.u. | F(i,j)<br>a.u. |
|--------------------------|---------------------------|------------------|-------------------|----------------|
| =====                    |                           |                  |                   |                |
| from unit 1 to unit 2    |                           |                  |                   |                |
| 5. BD ( 1) N 2 -Se 28    | /595. RY*( 1) N 29        | 0.54             | 1.88              | 0.029          |
| 6. BD ( 1) C 3 - C 4     | /598. RY*( 4) N 29        | 0.07             | 1.65              | 0.010          |
| 9. BD ( 1) C 3 -Se 28    | /595. RY*( 1) N 29        | 0.22             | 1.85              | 0.018          |
| 10. BD ( 1) C 4 - H 5    | /815. BD*( 2) N 29 - C 31 | 0.20             | 0.64              | 0.011          |
| 91. LP ( 1) Se 28        | /595. RY*( 1) N 29        | 0.10             | 1.95              | 0.013          |
| 91. LP ( 1) Se 28        | /813. BD*( 1) N 29 - C 30 | 0.47             | 1.37              | 0.023          |
| 91. LP ( 1) Se 28        | /814. BD*( 1) N 29 - C 31 | 0.35             | 1.37              | 0.020          |
| 91. LP ( 1) Se 28        | /815. BD*( 2) N 29 - C 31 | 0.22             | 0.81              | 0.013          |
| 92. LP ( 2) Se 28        | /813. BD*( 1) N 29 - C 30 | 0.18             | 0.89              | 0.012          |
| 92. LP ( 2) Se 28        | /814. BD*( 1) N 29 - C 31 | 0.12             | 0.89              | 0.010          |
| 92. LP ( 2) Se 28        | /816. BD*( 1) C 30 - C 32 | 0.07             | 0.90              | 0.007          |
| 92. LP ( 2) Se 28        | /819. BD*( 1) C 31 - C 34 | 0.12             | 0.90              | 0.010          |
| from unit 2 to unit 1    |                           |                  |                   |                |
| 38. BD ( 1) N 29 - C 30  | /780. BD*( 1) N 2 -Se 28  | 0.12             | 1.12              | 0.011          |
| 39. BD ( 1) N 29 - C 31  | /780. BD*( 1) N 2 -Se 28  | 0.13             | 1.12              | 0.011          |
| 40. BD ( 2) N 29 - C 31  | /199. RY*( 2) H 5         | 0.05             | 2.83              | 0.012          |
| 40. BD ( 2) N 29 - C 31  | /780. BD*( 1) N 2 -Se 28  | 0.15             | 0.55              | 0.009          |
| 40. BD ( 2) N 29 - C 31  | /785. BD*( 1) C 4 - H 5   | 0.15             | 0.88              | 0.011          |
| 41. BD ( 1) C 30 - C 32  | /780. BD*( 1) N 2 -Se 28  | 0.13             | 1.00              | 0.010          |
| 44. BD ( 1) C 31 - C 34  | /780. BD*( 1) N 2 -Se 28  | 0.12             | 1.00              | 0.010          |
| 93. LP ( 1) N 29         | /176. RY*( 5) C 4         | 0.06             | 2.23              | 0.010          |
| 93. LP ( 1) N 29         | /199. RY*( 2) H 5         | 0.05             | 2.90              | 0.011          |
| 93. LP ( 1) N 29         | /566. RY*( 2) Se 28       | 0.72             | 1.61              | 0.031          |
| 93. LP ( 1) N 29         | /569. RY*( 5) Se 28       | 0.09             | 1.49              | 0.011          |
| 93. LP ( 1) N 29         | /780. BD*( 1) N 2 -Se 28  | 9.69             | 0.62              | 0.070          |
| 93. LP ( 1) N 29         | /782. BD*( 1) C 3 - C 6   | 0.27             | 1.07              | 0.015          |
| 93. LP ( 1) N 29         | /784. BD*( 1) C 3 -Se 28  | 0.53             | 0.66              | 0.017          |
| 93. LP ( 1) N 29         | /785. BD*( 1) C 4 - H 5   | 0.30             | 0.95              | 0.015          |
| 93. LP ( 1) N 29         | /786. BD*( 1) C 4 - C 11  | 0.22             | 1.10              | 0.014          |
| 815. BD*( 2) N 29 - C 31 | /780. BD*( 1) N 2 -Se 28  | 0.16             | 0.14              | 0.009          |
| 815. BD*( 2) N 29 - C 31 | /785. BD*( 1) C 4 - H 5   | 0.09             | 0.46              | 0.013          |



1b.DMAP

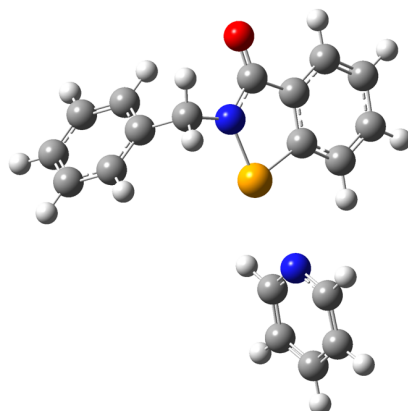

Sum of electronic and zero-point Energies= -3453.625096  
 Sum of electronic and thermal Energies= -3453.600653  
 Sum of electronic and thermal Enthalpies= -3453.599709  
 Sum of electronic and thermal Free Energies= -3453.686767

|    |    |           |             |              |
|----|----|-----------|-------------|--------------|
| 1  | O  |           |             |              |
| 2  | N  | 2.2873562 |             |              |
| 3  | C  | 2.5506623 | 95.5093419  |              |
| 4  | C  | 1.3893855 | 174.7226394 | 173.8096095  |
| 5  | H  | 1.0800564 | 120.7639763 | 8.3037486    |
| 6  | C  | 1.3896179 | 64.6683257  | 1.6439913    |
| 7  | C  | 1.4479618 | 96.0274283  | -178.5274035 |
| 8  | H  | 1.0914637 | 105.8435910 | -16.5933680  |
| 9  | H  | 1.0929702 | 109.2840874 | -132.6690412 |
| 10 | C  | 1.2193930 | 29.3764399  | -178.6152959 |
| 11 | C  | 1.3838154 | 118.4834662 | -171.7745820 |
| 12 | H  | 1.0830616 | 119.1159836 | 179.9645153  |
| 13 | C  | 1.5097880 | 113.1236501 | 104.2247606  |
| 14 | C  | 1.3938550 | 121.2571604 | -0.0730922   |
| 15 | H  | 1.0821706 | 119.9000386 | -179.9574391 |
| 16 | C  | 1.3809053 | 119.8857438 | 0.0102732    |
| 17 | H  | 1.0827649 | 122.0576226 | -179.8725106 |
| 18 | C  | 1.3874091 | 121.1107362 | 118.8333959  |
| 19 | H  | 1.0844699 | 119.5789242 | 0.2172248    |
| 20 | C  | 1.3922827 | 119.8013127 | -60.7804692  |
| 21 | H  | 1.0840223 | 119.2045880 | -0.6693524   |
| 22 | C  | 1.3837536 | 120.3960997 | 179.5626839  |
| 23 | H  | 1.0828500 | 119.7925549 | 179.8480237  |
| 24 | C  | 1.3885530 | 120.6305296 | -179.6784822 |
| 25 | H  | 1.0828626 | 119.8760846 | 179.9760548  |
| 26 | C  | 1.3846525 | 119.9621317 | 0.1467390    |
| 27 | H  | 1.0827530 | 120.1540472 | 179.9573434  |
| 28 | Se | 1.8661094 | 143.1206429 | -4.7919762   |
| 29 | N  | 2.8081066 | 175.7518337 | -12.4614980  |
| 30 | C  | 1.3294958 | 122.7123448 | 115.7156880  |
| 31 | C  | 1.3295854 | 116.6379334 | -82.1609029  |
| 32 | C  | 1.3851991 | 122.9996051 | 161.9862884  |
| 33 | H  | 1.0847336 | 116.0733309 | -17.9660900  |
| 34 | C  | 1.3852260 | 122.9715030 | -163.1213346 |

|    |   |           |             |              |
|----|---|-----------|-------------|--------------|
| 35 | H | 1.0847542 | 116.0188375 | 16.7348808   |
| 36 | C | 1.3849819 | 118.4855597 | 0.1114371    |
| 37 | H | 1.0815596 | 120.2000014 | -179.9730892 |
| 38 | H | 1.0815280 | 120.1718040 | -179.9871179 |
| 39 | H | 1.0826581 | 120.5924592 | 179.9435308  |

Second Order Perturbation Theory Analysis of Fock Matrix in NBO Basis

Threshold for printing: 0.50 kcal/mol  
(Intermolecular threshold: 0.05 kcal/mol)

| Donor NBO (i)            | Acceptor NBO (j)          | E(2) E(j)-E(i) F(i,j) |       |       |
|--------------------------|---------------------------|-----------------------|-------|-------|
|                          |                           | kcal/mol              | a.u.  | a.u.  |
| =====                    |                           |                       |       |       |
| from unit 1 to unit 2    |                           |                       |       |       |
| 5. BD ( 1) N 2 -Se 28    | /608. RY*( 1) N 29        | 0.64                  | 1.88  | 0.031 |
| 5. BD ( 1) N 2 -Se 28    | /610. RY*( 3) N 29        | 0.08                  | 1.52  | 0.010 |
| 6. BD ( 1) C 3 - C 4     | /608. RY*( 1) N 29        | 0.05                  | 1.99  | 0.009 |
| 6. BD ( 1) C 3 - C 4     | /610. RY*( 3) N 29        | 0.06                  | 1.63  | 0.009 |
| 9. BD ( 1) C 3 -Se 28    | /608. RY*( 1) N 29        | 0.27                  | 1.85  | 0.020 |
| 10. BD ( 1) C 4 - H 5    | /104. LP ( 2) N 29        | 0.46                  | 0.38  | 0.019 |
| 77. CR ( 3) Se 28        | /929. BD*( 1) N 29 - C 30 | 0.06                  | 11.37 | 0.023 |
| 101. LP ( 1) Se 28       | /104. LP ( 2) N 29        | 0.34                  | 0.56  | 0.020 |
| 101. LP ( 1) Se 28       | /608. RY*( 1) N 29        | 0.13                  | 1.96  | 0.014 |
| 101. LP ( 1) Se 28       | /929. BD*( 1) N 29 - C 30 | 0.59                  | 1.38  | 0.025 |
| 101. LP ( 1) Se 28       | /930. BD*( 1) N 29 - C 31 | 0.45                  | 1.38  | 0.022 |
| 102. LP ( 2) Se 28       | /929. BD*( 1) N 29 - C 30 | 0.22                  | 0.89  | 0.013 |
| 102. LP ( 2) Se 28       | /930. BD*( 1) N 29 - C 31 | 0.17                  | 0.89  | 0.012 |
| 102. LP ( 2) Se 28       | /931. BD*( 1) C 30 - C 32 | 0.09                  | 0.92  | 0.008 |
| 102. LP ( 2) Se 28       | /934. BD*( 1) C 31 - C 34 | 0.12                  | 0.92  | 0.010 |
| from unit 2 to unit 1    |                           |                       |       |       |
| 38. BD ( 1) N 29 - C 30  | /896. BD*( 1) N 2 -Se 28  | 0.17                  | 1.10  | 0.012 |
| 39. BD ( 1) N 29 - C 31  | /896. BD*( 1) N 2 -Se 28  | 0.17                  | 1.10  | 0.013 |
| 40. BD ( 1) C 30 - C 32  | /896. BD*( 1) N 2 -Se 28  | 0.15                  | 0.99  | 0.011 |
| 41. BD ( 2) C 30 - C 32  | /211. RY*( 1) H 5         | 0.05                  | 1.18  | 0.008 |
| 43. BD ( 1) C 31 - C 34  | /896. BD*( 1) N 2 -Se 28  | 0.15                  | 0.99  | 0.011 |
| 89. CR ( 1) N 29         | /896. BD*( 1) N 2 -Se 28  | 0.08                  | 14.40 | 0.030 |
| 103. LP ( 1) N 29        | /189. RY*( 5) C 4         | 0.08                  | 2.23  | 0.012 |
| 103. LP ( 1) N 29        | /212. RY*( 2) H 5         | 0.06                  | 2.91  | 0.012 |
| 103. LP ( 1) N 29        | /579. RY*( 2) Se 28       | 0.94                  | 1.63  | 0.036 |
| 103. LP ( 1) N 29        | /582. RY*( 5) Se 28       | 0.12                  | 1.47  | 0.012 |
| 103. LP ( 1) N 29        | /583. RY*( 6) Se 28       | 0.06                  | 1.57  | 0.009 |
| 103. LP ( 1) N 29        | /586. RY*( 9) Se 28       | 0.05                  | 2.01  | 0.009 |
| 103. LP ( 1) N 29        | /896. BD*( 1) N 2 -Se 28  | 12.79                 | 0.61  | 0.080 |
| 103. LP ( 1) N 29        | /898. BD*( 1) C 3 - C 6   | 0.32                  | 1.06  | 0.017 |
| 103. LP ( 1) N 29        | /900. BD*( 1) C 3 - Se 28 | 0.77                  | 0.65  | 0.021 |
| 103. LP ( 1) N 29        | /901. BD*( 1) C 4 - H 5   | 0.29                  | 0.95  | 0.015 |
| 103. LP ( 1) N 29        | /902. BD*( 1) C 4 - C 11  | 0.25                  | 1.09  | 0.015 |
| 104. LP ( 2) N 29        | /896. BD*( 1) N 2 -Se 28  | 0.39                  | 0.39  | 0.013 |
| 104. LP ( 2) N 29        | /901. BD*( 1) C 4 - H 5   | 0.39                  | 0.72  | 0.019 |
| 104. LP ( 2) N 29        | /902. BD*( 1) C 4 - C 11  | 0.08                  | 0.87  | 0.009 |
| 932. BD*( 2) C 30 - C 32 | /903. BD*( 2) C 4 - C 11  | 0.10                  | 0.02  | 0.002 |
| 935. BD*( 2) C 31 - C 34 | /903. BD*( 2) C 4 - C 11  | 0.08                  | 0.02  | 0.002 |
| =====                    |                           |                       |       |       |

## 1b.DMAP.H<sub>2</sub>O

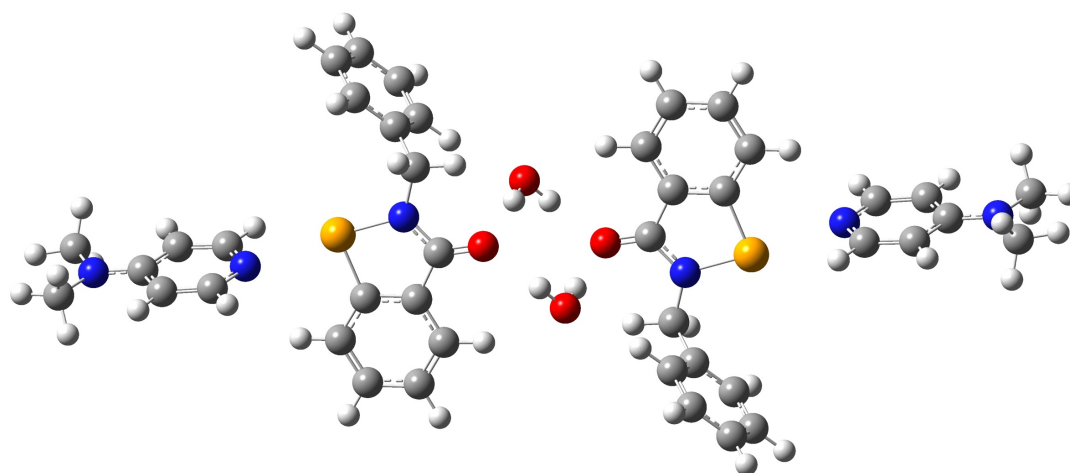

|    |          |           |           |
|----|----------|-----------|-----------|
| Se | 5.530614 | -0.271032 | -0.816659 |
| C  | 3.429821 | 1.462522  | -0.582959 |
| C  | 4.771111 | 3.69886   | 0.312442  |
| H  | 5.293802 | 4.579673  | 0.665135  |
| N  | 3.758485 | -0.749056 | -1.202817 |
| C  | 3.387876 | 3.737547  | 0.146878  |
| H  | 2.841197 | 4.643388  | 0.374016  |
| C  | 3.453046 | -2.081703 | -1.694819 |
| H  | 3.864872 | -2.197909 | -2.701673 |
| H  | 2.367186 | -2.138913 | -1.77067  |
| O  | 1.62388  | 0.042791  | -1.314282 |
| C  | 5.493651 | 2.550726  | 0.043078  |
| H  | 6.563358 | 2.520117  | 0.187854  |
| C  | 3.986447 | -3.16545  | -0.791183 |
| C  | 5.575085 | -4.924556 | -0.343683 |
| H  | 6.417218 | -5.526233 | -0.66241  |
| C  | 2.711216 | 2.619619  | -0.298996 |
| H  | 1.633655 | 2.624346  | -0.413591 |
| C  | 4.810455 | 1.428298  | -0.40762  |
| C  | 3.411831 | -3.377335 | 0.459457  |
| H  | 2.557478 | -2.783032 | 0.76882   |
| C  | 5.065886 | -3.945121 | -1.185103 |
| H  | 5.515145 | -3.783945 | -2.159069 |

|    |           |           |           |
|----|-----------|-----------|-----------|
| C  | 5.0033    | -5.128637 | 0.901186  |
| H  | 5.396193  | -5.89261  | 1.560709  |
| C  | 3.920631  | -4.354413 | 1.298233  |
| H  | 3.464768  | -4.516068 | 2.267075  |
| C  | 2.821628  | 0.209852  | -1.063676 |
| O  | 0.54424   | -1.705949 | 0.682679  |
| H  | -0.136015 | -1.168207 | 1.114165  |
| H  | 0.816914  | -1.173904 | -0.078075 |
| C  | 10.231981 | 1.257194  | -0.840416 |
| H  | 10.835114 | 1.74587   | -1.590429 |
| C  | 10.801541 | 0.708025  | 0.323274  |
| C  | 9.907532  | 0.088271  | 1.215135  |
| H  | 10.247485 | -0.370529 | 2.131073  |
| N  | 8.028849  | 0.587015  | -0.182948 |
| C  | 13.025816 | 1.365386  | -0.403506 |
| H  | 13.004212 | 0.827927  | -1.357415 |
| H  | 14.043798 | 1.337086  | -0.023711 |
| H  | 12.769274 | 2.411397  | -0.593693 |
| C  | 8.871274  | 1.168614  | -1.03413  |
| H  | 8.426312  | 1.590513  | -1.929565 |
| C  | 8.563221  | 0.05862   | 0.915963  |
| H  | 7.868704  | -0.42223  | 1.59709   |
| C  | 12.685187 | 0.142908  | 1.751421  |
| H  | 12.253058 | 0.562211  | 2.664346  |
| H  | 13.758114 | 0.313702  | 1.783039  |
| H  | 12.512944 | -0.938517 | 1.755612  |
| N  | 12.137794 | 0.771972  | 0.570516  |
| Se | -5.545859 | 0.259516  | 0.852708  |
| C  | -3.436671 | -1.468279 | 0.65696   |
| C  | -4.750616 | -3.695972 | -0.29962  |
| H  | -5.262149 | -4.573392 | -0.676318 |
| N  | -3.786609 | 0.735599  | 1.293636  |
| C  | -3.372307 | -3.734893 | -0.097076 |
| H  | -2.818464 | -4.63752  | -0.319624 |
| C  | -3.497067 | 2.063233  | 1.807884  |
| H  | -3.932253 | 2.166681  | 2.806276  |
| H  | -2.413408 | 2.122735  | 1.909385  |
| O  | -1.653552 | -0.052285 | 1.450281  |
| C  | -5.481728 | -2.551695 | -0.036977 |
| H  | -6.54711  | -2.520117 | -0.21062  |
| C  | -4.013307 | 3.15576   | 0.90485   |
| C  | -5.594515 | 4.918145  | 0.444108  |
| H  | -6.443419 | 5.515791  | 0.752281  |
| C  | -2.709227 | -2.6214   | 0.379409  |
| H  | -1.635077 | -2.626429 | 0.522479  |
| C  | -4.812125 | -1.433948 | 0.4447    |

|   |            |           |           |
|---|------------|-----------|-----------|
| C | -3.414326  | 3.380841  | -0.331984 |
| H | -2.553782  | 2.789998  | -0.630704 |
| C | -5.101115  | 3.93045   | 1.28529   |
| H | -5.569545  | 3.758749  | 2.248358  |
| C | -4.998444  | 5.135456  | -0.787032 |
| H | -5.37898   | 5.905866  | -1.446316 |
| C | -3.907428  | 4.366103  | -1.170551 |
| H | -3.43278   | 4.53791   | -2.12857  |
| C | -2.843955  | -0.219895 | 1.167583  |
| O | -0.54962   | 1.709187  | -0.5213   |
| H | 0.124322   | 1.164179  | -0.954004 |
| H | -0.830079  | 1.177482  | 0.236788  |
| C | -10.262633 | -1.262019 | 0.660576  |
| H | -10.902053 | -1.761269 | 1.372637  |
| C | -10.774621 | -0.694653 | -0.520965 |
| C | -9.838101  | -0.062298 | -1.358597 |
| H | -10.133153 | 0.410847  | -2.282757 |
| N | -8.029778  | -0.584307 | 0.121591  |
| C | -13.031983 | -1.360112 | 0.086498  |
| H | -13.056511 | -0.837003 | 1.048313  |
| H | -14.030246 | -1.324886 | -0.341952 |
| H | -12.78552  | -2.409154 | 0.273297  |
| C | -8.912826  | -1.178036 | 0.921657  |
| H | -8.512308  | -1.614032 | 1.831202  |
| C | -8.509959  | -0.038757 | -0.993835 |
| H | -7.782944  | 0.451765  | -1.632927 |
| C | -12.585922 | -0.105065 | -2.030215 |
| H | -12.109155 | -0.509906 | -2.927304 |
| H | -13.655967 | -0.274635 | -2.117474 |
| H | -12.413765 | 0.976186  | -2.008572 |
| N | -12.097259 | -0.753439 | -0.834129 |

#### Second Order Perturbation Theory Analysis of Fock Matrix in NBO Basis

Threshold for printing: 0.50 kcal/mol  
 (Intermolecular threshold: 0.05 kcal/mol)

| Donor NBO (i)         | Acceptor NBO (j)    | E(2)  | E(j)-E(i) | F(i,j)   |      |      |
|-----------------------|---------------------|-------|-----------|----------|------|------|
|                       |                     |       |           | kcal/mol | a.u. | a.u. |
| =====                 |                     |       |           |          |      |      |
| from unit 1 to unit 2 |                     |       |           |          |      |      |
| 210.LP (1)N 37.       | /***BD*(1)Se 1-N 5. | 13.51 | 0.61      | 0.082    |      |      |

## 1b.DABCO

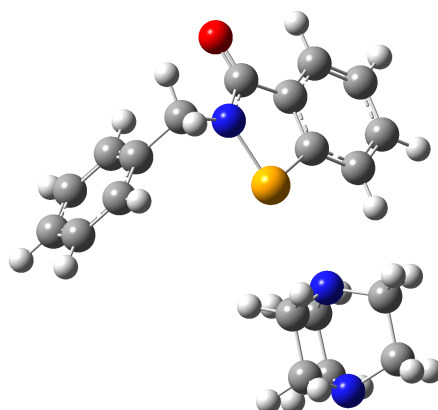

Sum of electronic and zero-point Energies= -3416.687566  
 Sum of electronic and thermal Energies= -3416.665539  
 Sum of electronic and thermal Enthalpies= -3416.664595  
 Sum of electronic and thermal Free Energies= -3416.744396

|    |   |           |             |              |
|----|---|-----------|-------------|--------------|
| 1  | O |           |             |              |
| 2  | N | 2.2885304 |             |              |
| 3  | C | 2.5461805 | 95.5249623  |              |
| 4  | C | 1.3881234 | 174.3360128 | 165.8635744  |
| 5  | H | 1.0795435 | 120.7711088 | 15.9548145   |
| 6  | C | 1.3890925 | 64.8320922  | 1.8332635    |
| 7  | C | 1.4475188 | 96.3104039  | -178.2217161 |
| 8  | H | 1.0914039 | 105.7510470 | -10.8198382  |
| 9  | H | 1.0932866 | 109.4948649 | -126.9439460 |
| 10 | C | 1.2185939 | 29.3477433  | -178.2159397 |
| 11 | C | 1.3835841 | 118.5924476 | -163.6482515 |
| 12 | H | 1.0830202 | 119.2414707 | 179.9153580  |
| 13 | C | 1.5096143 | 112.7983113 | 110.0984282  |
| 14 | C | 1.3938673 | 121.1118213 | 0.0628704    |
| 15 | H | 1.0820911 | 119.8625554 | 179.9979071  |
| 16 | C | 1.3813352 | 119.9405040 | 0.2187552    |
| 17 | H | 1.0827655 | 122.0061005 | 179.7699631  |
| 18 | C | 1.3874767 | 121.0948098 | 118.2667405  |
| 19 | H | 1.0845003 | 119.5482429 | 0.7745543    |
| 20 | C | 1.3920184 | 119.8299393 | -60.8339906  |
| 21 | H | 1.0840822 | 119.2232361 | -0.9549631   |
| 22 | C | 1.3835849 | 120.4364178 | 179.0654933  |
| 23 | H | 1.0828015 | 119.8197953 | 179.8389958  |
| 24 | C | 1.3886494 | 120.6298245 | -179.1483700 |
| 25 | H | 1.0828729 | 119.8833252 | -179.9482986 |
| 26 | C | 1.3846754 | 119.9597318 | 0.1369325    |
| 27 | H | 1.0826998 | 120.1546510 | 179.9802893  |
| 28 | C | 3.8005758 | 98.4704369  | 7.5958629    |
| 29 | C | 2.3923609 | 69.1952574  | 81.9963680   |
| 30 | C | 2.3837244 | 98.3692348  | 28.7128219   |
| 31 | C | 1.5548116 | 149.4793962 | 132.1403256  |
| 32 | H | 1.0917198 | 49.4981677  | -169.0800464 |
| 33 | H | 1.0913611 | 97.6184192  | -62.6808793  |
| 34 | H | 1.0913242 | 143.1652551 | -76.5024662  |
| 35 | H | 1.0915044 | 90.8183852  | 44.5086496   |

|    |    |           |             |              |
|----|----|-----------|-------------|--------------|
| 36 | C  | 1.5539830 | 89.4525412  | 155.9384513  |
| 37 | C  | 1.5528218 | 90.2426709  | 149.3721598  |
| 38 | H  | 1.0919829 | 143.7065071 | 20.5447882   |
| 39 | H  | 1.0920580 | 89.3779152  | -98.9832092  |
| 40 | H  | 1.0916345 | 111.2037088 | 45.3251506   |
| 41 | H  | 1.0916047 | 111.2173086 | 165.0721870  |
| 42 | H  | 1.0914920 | 111.2251178 | 151.0752789  |
| 43 | H  | 1.0916667 | 111.2505860 | -89.1530574  |
| 44 | H  | 1.0915126 | 111.2005660 | -149.1643067 |
| 45 | H  | 1.0915990 | 111.2531469 | 91.0529840   |
| 46 | Se | 1.8669559 | 142.9991024 | -6.2789178   |
| 47 | N  | 1.4650621 | 65.9579847  | 43.8542916   |
| 48 | N  | 1.4595290 | 110.0408545 | -74.8489168  |

Second Order Perturbation Theory Analysis of Fock Matrix in NBO Basis

Threshold for printing: 0.50 kcal/mol

(Intermolecular threshold: 0.05 kcal/mol)

| Donor NBO (i)           | Acceptor NBO (j)          | E(2) E(j)-E(i) F(i,j) |      |       |
|-------------------------|---------------------------|-----------------------|------|-------|
|                         |                           | kcal/mol              | a.u. | a.u.  |
| =====                   |                           |                       |      |       |
| from unit 1 to unit 2   |                           |                       |      |       |
| 5. BD ( 1) N 2 -Se 46   | /821. RY*( 1) N 47        | 0.57                  | 1.75 | 0.028 |
| 9. BD ( 1) C 3 -Se 46   | /821. RY*( 1) N 47        | 0.24                  | 1.72 | 0.018 |
| 10. BD ( 1) C 4 - H 5   | /910. BD*( 1) C 28 - C 31 | 0.07                  | 1.01 | 0.008 |
| 10. BD ( 1) C 4 - H 5   | /911. BD*( 1) C 28 - H 32 | 0.09                  | 1.05 | 0.009 |
| 10. BD ( 1) C 4 - H 5   | /915. BD*( 1) C 29 - H 35 | 0.05                  | 1.06 | 0.007 |
| 10. BD ( 1) C 4 - H 5   | /921. BD*( 1) C 30 - N 47 | 0.13                  | 1.02 | 0.010 |
| 100. LP ( 1) Se 46      | /821. RY*( 1) N 47        | 0.05                  | 1.82 | 0.009 |
| 100. LP ( 1) Se 46      | /913. BD*( 1) C 28 - N 47 | 0.57                  | 1.19 | 0.023 |
| 100. LP ( 1) Se 46      | /917. BD*( 1) C 29 - N 47 | 0.29                  | 1.19 | 0.017 |
| 100. LP ( 1) Se 46      | /918. BD*( 1) C 30 - C 37 | 0.74                  | 1.18 | 0.027 |
| 101. LP ( 2) Se 46      | /910. BD*( 1) C 28 - C 31 | 0.05                  | 0.69 | 0.006 |
| 101. LP ( 2) Se 46      | /913. BD*( 1) C 28 - N 47 | 0.23                  | 0.71 | 0.012 |
| 101. LP ( 2) Se 46      | /916. BD*( 1) C 29 - C 36 | 0.16                  | 0.69 | 0.010 |
| 101. LP ( 2) Se 46      | /917. BD*( 1) C 29 - N 47 | 0.08                  | 0.71 | 0.007 |
| 101. LP ( 2) Se 46      | /919. BD*( 1) C 30 - H 38 | 0.14                  | 0.75 | 0.010 |
| from unit 2 to unit 1   |                           |                       |      |       |
| 38. BD ( 1) C 28 - C 31 | /877. BD*( 1) N 2 -Se 46  | 0.10                  | 0.85 | 0.008 |
| 39. BD ( 1) C 28 - H 32 | /208. RY*( 1) H 5         | 0.36                  | 1.57 | 0.021 |
| 39. BD ( 1) C 28 - H 32 | /882. BD*( 1) C 4 - H 5   | 0.41                  | 1.09 | 0.019 |
| 40. BD ( 1) C 28 - H 33 | /795. RY*( 5) Se 46       | 0.06                  | 1.73 | 0.009 |
| 40. BD ( 1) C 28 - H 33 | /799. RY*( 9) Se 46       | 0.07                  | 1.93 | 0.010 |
| 41. BD ( 1) C 28 - N 47 | /882. BD*( 1) C 4 - H 5   | 0.07                  | 1.29 | 0.008 |
| 42. BD ( 1) C 29 - H 34 | /791. RY*( 1) Se 46       | 0.05                  | 1.36 | 0.008 |
| 42. BD ( 1) C 29 - H 34 | /795. RY*( 5) Se 46       | 0.17                  | 1.72 | 0.015 |
| 42. BD ( 1) C 29 - H 34 | /798. RY*( 8) Se 46       | 0.05                  | 2.58 | 0.011 |
| 43. BD ( 1) C 29 - H 35 | /184. RY*( 3) C 4         | 0.06                  | 1.27 | 0.008 |
| 43. BD ( 1) C 29 - H 35 | /208. RY*( 1) H 5         | 0.11                  | 1.56 | 0.011 |
| 43. BD ( 1) C 29 - H 35 | /882. BD*( 1) C 4 - H 5   | 0.10                  | 1.08 | 0.009 |
| 43. BD ( 1) C 29 - H 35 | /884. BD*( 2) C 4 - C 11  | 0.07                  | 0.67 | 0.007 |
| 44. BD ( 1) C 29 - C 36 | /877. BD*( 1) N 2 -Se 46  | 0.07                  | 0.85 | 0.007 |
| 45. BD ( 1) C 29 - N 47 | /877. BD*( 1) N 2 -Se 46  | 0.08                  | 0.96 | 0.008 |
| 47. BD ( 1) C 30 - H 38 | /791. RY*( 1) Se 46       | 0.08                  | 1.36 | 0.009 |
| 47. BD ( 1) C 30 - H 38 | /794. RY*( 4) Se 46       | 0.11                  | 1.90 | 0.013 |
| 47. BD ( 1) C 30 - H 38 | /877. BD*( 1) N 2 -Se 46  | 0.09                  | 0.76 | 0.008 |
| 47. BD ( 1) C 30 - H 38 | /881. BD*( 1) C 3 -Se 46  | 0.14                  | 0.80 | 0.010 |
| 48. BD ( 1) C 30 - H 39 | /794. RY*( 4) Se 46       | 0.08                  | 1.90 | 0.011 |
| 49. BD ( 1) C 30 - N 47 | /877. BD*( 1) N 2 -Se 46  | 0.10                  | 0.96 | 0.009 |
| 102. LP ( 1) N 47       | /792. RY*( 2) Se 46       | 0.90                  | 1.42 | 0.033 |

|                   |                          |      |      |       |
|-------------------|--------------------------|------|------|-------|
| 102. LP ( 1) N 47 | /794. RY*( 4)Se 46       | 0.06 | 1.70 | 0.009 |
| 102. LP ( 1) N 47 | /795. RY*( 5)Se 46       | 0.18 | 1.53 | 0.015 |
| 102. LP ( 1) N 47 | /797. RY*( 7)Se 46       | 0.07 | 1.62 | 0.010 |
| 102. LP ( 1) N 47 | /806. RY*( 16)Se 46      | 0.07 | 2.43 | 0.012 |
| 102. LP ( 1) N 47 | /807. RY*( 17)Se 46      | 0.05 | 2.34 | 0.010 |
| 102. LP ( 1) N 47 | /877. BD*( 1) N 2 -Se 46 | 8.11 | 0.56 | 0.061 |
| 102. LP ( 1) N 47 | /879. BD*( 1) C 3 - C 6  | 0.13 | 1.00 | 0.011 |
| 102. LP ( 1) N 47 | /881. BD*( 1) C 3 -Se 46 | 0.66 | 0.60 | 0.018 |
| 102. LP ( 1) N 47 | /883. BD*( 1) C 4 - C 11 | 0.07 | 1.03 | 0.008 |

### 3.pyridine

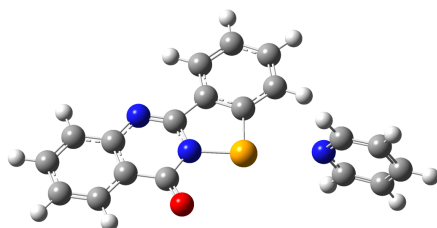

Sum of electronic and zero-point Energies= -3372.706101  
Sum of electronic and thermal Energies= -3372.686932  
Sum of electronic and thermal Enthalpies= -3372.685988  
Sum of electronic and thermal Free Energies= -3372.758608

|    |    |           |             |              |
|----|----|-----------|-------------|--------------|
| 1  | Se |           |             |              |
| 2  | C  | 4.0945945 |             |              |
| 3  | H  | 1.0822296 | 132.0415320 |              |
| 4  | N  | 1.8784552 | 63.1075590  | -0.1466880   |
| 5  | C  | 1.3901911 | 13.3133129  | -0.0138634   |
| 6  | C  | 1.3797807 | 106.0054721 | 179.8743725  |
| 7  | H  | 1.0820298 | 120.1219820 | 179.9687255  |
| 8  | C  | 1.3832129 | 119.0614248 | 179.9217645  |
| 9  | C  | 1.3947042 | 120.6361630 | 0.1075609    |
| 10 | C  | 2.4761502 | 141.9561784 | -179.8783000 |
| 11 | H  | 1.0822248 | 87.5940048  | -179.9620351 |
| 12 | N  | 2.3535426 | 143.9126364 | 0.2695521    |
| 13 | O  | 1.2158337 | 120.4550473 | 0.1238177    |
| 14 | C  | 2.3993256 | 120.3115264 | 0.0480718    |
| 15 | H  | 1.0830887 | 149.3832785 | 179.9811865  |
| 16 | C  | 1.3896573 | 120.0423030 | 0.0679948    |
| 17 | H  | 1.0798686 | 120.5331308 | 179.8675356  |
| 18 | C  | 1.3765931 | 88.0254038  | 179.7803379  |
| 19 | C  | 1.2893984 | 28.5782273  | -0.2124444   |
| 20 | C  | 1.3734973 | 150.7709991 | 0.0606224    |
| 21 | H  | 1.0821270 | 120.2609601 | 179.9752419  |
| 22 | C  | 1.3835345 | 118.8614162 | -0.0688095   |
| 23 | H  | 1.0829038 | 119.1281235 | 179.9971482  |
| 24 | C  | 1.3732464 | 91.0339728  | -0.0150706   |
| 25 | H  | 1.0819884 | 121.5642423 | 179.9963581  |
| 26 | C  | 1.3983215 | 30.6962268  | 0.0211644    |
| 27 | N  | 2.7647396 | 175.0127404 | -6.2613025   |
| 28 | C  | 1.3297677 | 119.0664140 | -90.6339476  |
| 29 | C  | 1.3296713 | 119.8424149 | 108.4889355  |
| 30 | C  | 1.3848136 | 122.9375832 | -161.4174878 |
| 31 | H  | 1.0846567 | 116.0803408 | 18.4136625   |
| 32 | C  | 1.3849551 | 122.9263103 | 161.2638736  |
| 33 | H  | 1.0845882 | 116.0949181 | -18.5547894  |



|    |   |           |             |              |
|----|---|-----------|-------------|--------------|
| 34 | C | 1.3850146 | 118.4828824 | -0.1145477   |
| 35 | H | 1.0814627 | 120.1698186 | 179.9329318  |
| 36 | H | 1.0814710 | 120.1639365 | -179.9417357 |
| 37 | H | 1.0826096 | 120.5756889 | -179.8913610 |

Second Order Perturbation Theory Analysis of Fock Matrix in NBO Basis

Threshold for printing: 0.50 kcal/mol  
 (Intermolecular threshold: 0.05 kcal/mol)

| Donor NBO (i)          | Acceptor NBO (j)          | E(2)<br>kcal/mol | E(j)-E(i)<br>a.u. | F(i,j)<br>a.u. |
|------------------------|---------------------------|------------------|-------------------|----------------|
| =====                  |                           |                  |                   |                |
| from unit 1 to unit 2  |                           |                  |                   |                |
| 1. BD ( 1)Se 1 - N 4   | /607. RY*( 1) N 27        | 0.54             | 1.89              | 0.029          |
| 1. BD ( 1)Se 1 - N 4   | /609. RY*( 3) N 27        | 0.05             | 1.89              | 0.009          |
| 2. BD ( 2)Se 1 - N 4   | /608. RY*( 2) N 27        | 0.11             | 1.32              | 0.012          |
| 3. BD ( 1)Se 1 - C 9   | /607. RY*( 1) N 27        | 0.22             | 1.85              | 0.018          |
| 18. BD ( 1)C 9 - C 16  | /610. RY*( 4) N 27        | 0.08             | 1.66              | 0.010          |
| 30. BD ( 1)C 16 - H 17 | /828. BD*( 2) N 27 - C 29 | 0.22             | 0.64              | 0.012          |
| 90. LP ( 1)Se 1        | /607. RY*( 1) N 27        | 0.08             | 1.97              | 0.012          |
| 90. LP ( 1)Se 1        | /826. BD*( 1) N 27 - C 28 | 0.46             | 1.39              | 0.023          |
| 90. LP ( 1)Se 1        | /827. BD*( 1) N 27 - C 29 | 0.46             | 1.39              | 0.023          |
| 90. LP ( 1)Se 1        | /828. BD*( 2) N 27 - C 29 | 0.28             | 0.82              | 0.015          |
| 91. LP ( 2)Se 1        | /608. RY*( 2) N 27        | 1.54             | 0.98              | 0.042          |
| 91. LP ( 2)Se 1        | /613. RY*( 7) N 27        | 0.20             | 5.07              | 0.034          |
| 91. LP ( 2)Se 1        | /615. RY*( 9) N 27        | 0.19             | 2.08              | 0.021          |
| 91. LP ( 2)Se 1        | /618. RY*( 12) N 27       | 0.08             | 3.68              | 0.019          |
| 91. LP ( 2)Se 1        | /633. RY*( 1) C 28        | 0.10             | 1.56              | 0.014          |
| 91. LP ( 2)Se 1        | /634. RY*( 2) C 28        | 0.38             | 1.40              | 0.025          |
| 91. LP ( 2)Se 1        | /635. RY*( 3) C 28        | 0.05             | 0.89              | 0.007          |
| 91. LP ( 2)Se 1        | /636. RY*( 4) C 28        | 0.08             | 1.50              | 0.012          |
| 91. LP ( 2)Se 1        | /639. RY*( 7) C 28        | 0.09             | 2.08              | 0.015          |
| 91. LP ( 2)Se 1        | /645. RY*( 13) C 28       | 0.09             | 2.05              | 0.015          |
| 91. LP ( 2)Se 1        | /659. RY*( 1) C 29        | 0.11             | 1.56              | 0.014          |
| 91. LP ( 2)Se 1        | /660. RY*( 2) C 29        | 0.32             | 1.40              | 0.023          |
| 91. LP ( 2)Se 1        | /662. RY*( 4) C 29        | 0.05             | 1.50              | 0.010          |
| 91. LP ( 2)Se 1        | /665. RY*( 7) C 29        | 0.09             | 2.11              | 0.015          |
| 91. LP ( 2)Se 1        | /670. RY*( 12) C 29       | 0.10             | 1.83              | 0.015          |
| 91. LP ( 2)Se 1        | /826. BD*( 1) N 27 - C 28 | 0.14             | 0.57              | 0.010          |
| 91. LP ( 2)Se 1        | /827. BD*( 1) N 27 - C 29 | 0.15             | 0.58              | 0.010          |
| 91. LP ( 2)Se 1        | /828. BD*( 2) N 27 - C 29 | 0.79             | 0.01              | 0.003          |
| 91. LP ( 2)Se 1        | /829. BD*( 1) C 28 - C 30 | 0.14             | 0.59              | 0.010          |
| 91. LP ( 2)Se 1        | /830. BD*( 2) C 28 - C 30 | 0.30             | 0.04              | 0.003          |
| 91. LP ( 2)Se 1        | /831. BD*( 1) C 28 - H 31 | 0.06             | 0.44              | 0.006          |
| 91. LP ( 2)Se 1        | /832. BD*( 1) C 29 - C 32 | 0.13             | 0.59              | 0.009          |
| 91. LP ( 2)Se 1        | /833. BD*( 1) C 29 - H 33 | 0.06             | 0.44              | 0.005          |
| 789. BD*( 2)Se 1 - N 4 | /608. RY*( 2) N 27        | 2.71             | 0.37              | 0.058          |
| 789. BD*( 2)Se 1 - N 4 | /613. RY*( 7) N 27        | 0.19             | 4.46              | 0.054          |
| 789. BD*( 2)Se 1 - N 4 | /615. RY*( 9) N 27        | 0.39             | 1.47              | 0.044          |
| 789. BD*( 2)Se 1 - N 4 | /618. RY*( 12) N 27       | 0.10             | 3.08              | 0.033          |
| 789. BD*( 2)Se 1 - N 4 | /633. RY*( 1) C 28        | 0.17             | 0.95              | 0.024          |
| 789. BD*( 2)Se 1 - N 4 | /634. RY*( 2) C 28        | 0.26             | 0.80              | 0.026          |
| 789. BD*( 2)Se 1 - N 4 | /635. RY*( 3) C 28        | 0.09             | 0.28              | 0.009          |
| 789. BD*( 2)Se 1 - N 4 | /636. RY*( 4) C 28        | 0.18             | 0.90              | 0.023          |
| 789. BD*( 2)Se 1 - N 4 | /639. RY*( 7) C 28        | 0.12             | 1.47              | 0.025          |
| 789. BD*( 2)Se 1 - N 4 | /645. RY*( 13) C 28       | 0.11             | 1.44              | 0.024          |
| 789. BD*( 2)Se 1 - N 4 | /646. RY*( 14) C 28       | 0.06             | 1.51              | 0.018          |
| 789. BD*( 2)Se 1 - N 4 | /659. RY*( 1) C 29        | 0.18             | 0.95              | 0.024          |
| 789. BD*( 2)Se 1 - N 4 | /660. RY*( 2) C 29        | 0.20             | 0.80              | 0.023          |
| 789. BD*( 2)Se 1 - N 4 | /661. RY*( 3) C 29        | 0.08             | 0.34              | 0.009          |
| 789. BD*( 2)Se 1 - N 4 | /662. RY*( 4) C 29        | 0.13             | 0.90              | 0.020          |

|                        |                     |      |      |       |
|------------------------|---------------------|------|------|-------|
| 789. BD*( 2)Se 1 - N 4 | /665. RY*( 7) C 29  | 0.13 | 1.50 | 0.025 |
| 789. BD*( 2)Se 1 - N 4 | /670. RY*( 12) C 29 | 0.14 | 1.22 | 0.024 |
| 789. BD*( 2)Se 1 - N 4 | /677. RY*( 19) C 29 | 0.06 | 1.61 | 0.018 |
| 789. BD*( 2)Se 1 - N 4 | /686. RY*( 2) C 30  | 0.06 | 0.92 | 0.014 |
| 789. BD*( 2)Se 1 - N 4 | /717. RY*( 2) C 32  | 0.06 | 0.92 | 0.013 |

from unit 2 to unit 1

|                          |                           |       |       |       |
|--------------------------|---------------------------|-------|-------|-------|
| 39. BD ( 1) N 27 - C 28  | /788. BD*( 1)Se 1 - N 4   | 0.16  | 1.10  | 0.012 |
| 40. BD ( 1) N 27 - C 29  | /788. BD*( 1)Se 1 - N 4   | 0.16  | 1.10  | 0.012 |
| 41. BD ( 2) N 27 - C 29  | /432. RY*( 2) H 17        | 0.06  | 2.84  | 0.013 |
| 41. BD ( 2) N 27 - C 29  | /788. BD*( 1)Se 1 - N 4   | 0.21  | 0.53  | 0.010 |
| 41. BD ( 2) N 27 - C 29  | /817. BD*( 1) C 16 - H 17 | 0.18  | 0.88  | 0.012 |
| 42. BD ( 1) C 28 - C 30  | /788. BD*( 1)Se 1 - N 4   | 0.14  | 0.97  | 0.011 |
| 45. BD ( 1) C 29 - C 32  | /788. BD*( 1)Se 1 - N 4   | 0.14  | 0.97  | 0.011 |
| 84. CR ( 1) N 27         | /788. BD*( 1)Se 1 - N 4   | 0.06  | 14.40 | 0.028 |
| 95. LP ( 1) N 27         | /96. RY*( 1)Se 1          | 0.74  | 1.74  | 0.033 |
| 95. LP ( 1) N 27         | /98. RY*( 3)Se 1          | 0.11  | 1.33  | 0.011 |
| 95. LP ( 1) N 27         | /102. RY*( 7)Se 1         | 0.10  | 1.94  | 0.013 |
| 95. LP ( 1) N 27         | /409. RY*( 5) C 16        | 0.06  | 2.24  | 0.011 |
| 95. LP ( 1) N 27         | /788. BD*( 1)Se 1 - N 4   | 11.72 | 0.60  | 0.076 |
| 95. LP ( 1) N 27         | /790. BD*( 1)Se 1 - C 9   | 0.57  | 0.66  | 0.018 |
| 95. LP ( 1) N 27         | /797. BD*( 1) C 5 - C 9   | 0.29  | 1.05  | 0.016 |
| 95. LP ( 1) N 27         | /817. BD*( 1) C 16 - H 17 | 0.34  | 0.95  | 0.016 |
| 95. LP ( 1) N 27         | /818. BD*( 1) C 16 - C 22 | 0.24  | 1.09  | 0.015 |
| 828. BD*( 2) N 27 - C 29 | /788. BD*( 1)Se 1 - N 4   | 0.27  | 0.12  | 0.010 |
| 828. BD*( 2) N 27 - C 29 | /817. BD*( 1) C 16 - H 17 | 0.09  | 0.46  | 0.013 |
| 830. BD*( 2) C 28 - C 30 | /819. BD*( 2) C 16 - C 22 | 0.08  | 0.02  | 0.002 |

### 3.DMAP

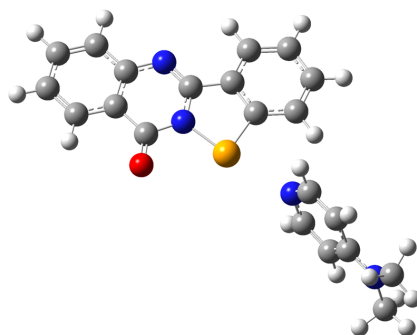

|                                              |              |
|----------------------------------------------|--------------|
| Sum of electronic and zero-point Energies=   | -3506.617706 |
| Sum of electronic and thermal Energies=      | -3506.594241 |
| Sum of electronic and thermal Enthalpies=    | -3506.593296 |
| Sum of electronic and thermal Free Energies= | -3506.675816 |

|    |    |           |             |              |
|----|----|-----------|-------------|--------------|
| 1  | Se |           |             |              |
| 2  | C  | 4.0988951 |             |              |
| 3  | H  | 1.0822571 | 132.0093838 |              |
| 4  | N  | 1.8886157 | 62.9094797  | 0.0009172    |
| 5  | C  | 1.3903154 | 13.3326133  | 0.0039338    |
| 6  | C  | 1.3796235 | 106.0247001 | -179.9983017 |
| 7  | H  | 1.0821112 | 120.1512375 | 179.9989505  |
| 8  | C  | 1.3825108 | 119.1980730 | -179.9961648 |
| 9  | C  | 1.3950636 | 120.7086696 | 0.0024707    |
| 10 | C  | 2.4769239 | 142.0307291 | 179.9979300  |
| 11 | H  | 1.0822573 | 87.5522965  | 179.9974192  |
| 12 | N  | 2.3552384 | 143.8784042 | -0.0048268   |
| 13 | O  | 1.2163057 | 120.6032072 | -0.0035947   |

|    |   |           |             |              |
|----|---|-----------|-------------|--------------|
| 14 | C | 2.3991950 | 120.3334356 | -0.0027565   |
| 15 | H | 1.0831542 | 149.3974751 | -179.9994123 |
| 16 | C | 1.3901002 | 119.8868446 | 0.0000000    |
| 17 | H | 1.0796856 | 120.3983882 | 179.9996477  |
| 18 | C | 1.3759124 | 88.0739587  | -179.9942675 |
| 19 | C | 1.2905785 | 28.4323293  | 0.0053619    |
| 20 | C | 1.3735093 | 150.8052379 | -0.0031887   |
| 21 | H | 1.0821609 | 120.2764902 | -179.9994506 |
| 22 | C | 1.3834466 | 118.9508623 | 0.0000000    |
| 23 | H | 1.0830256 | 119.0987385 | -179.9996577 |
| 24 | C | 1.3731639 | 91.0168921  | 0.0004297    |
| 25 | H | 1.0820314 | 121.5619537 | 180.0000000  |
| 26 | C | 1.3983083 | 30.6956910  | -0.0017033   |
| 27 | N | 2.6709579 | 174.5207770 | -0.0128247   |
| 28 | C | 1.3317985 | 120.4207654 | -99.3053258  |
| 29 | C | 1.3317969 | 120.4332713 | 99.3129882   |
| 30 | C | 1.3767030 | 124.2100751 | -162.3953014 |
| 31 | H | 1.0850302 | 115.9657699 | 17.4288037   |
| 32 | C | 1.3767040 | 124.2100083 | 162.3928137  |
| 33 | H | 1.0850292 | 115.9658863 | -17.4321402  |
| 34 | C | 1.4074417 | 119.4581441 | -0.1616757   |
| 35 | H | 1.0793185 | 118.8907101 | 179.8272549  |
| 36 | H | 1.0793185 | 118.8904974 | -179.8292147 |
| 37 | N | 1.3589303 | 121.9802273 | -179.9249766 |
| 38 | C | 1.4458887 | 120.0499415 | 1.1076371    |
| 39 | H | 1.0945336 | 111.7519423 | 60.7647772   |
| 40 | H | 1.0867652 | 109.2252517 | -179.8143895 |
| 41 | H | 1.0940533 | 111.5713227 | -60.6367885  |
| 42 | C | 1.4458868 | 120.0500830 | 178.8056517  |
| 43 | H | 1.0940497 | 111.5700023 | 60.6089225   |
| 44 | H | 1.0867662 | 109.2251882 | 179.7845635  |
| 45 | H | 1.0945373 | 111.7534664 | -60.7928145  |

## Second Order Perturbation Theory Analysis of Fock Matrix in NBO Basis

Threshold for printing: 0.50 kcal/mol  
(Intermolecular threshold: 0.05 kcal/mol)

| Donor NBO (i)          | Acceptor NBO (j)          | E(2)<br>kcal/mol | E(j)-E(i)<br>a.u. | F(i,j)<br>a.u. |
|------------------------|---------------------------|------------------|-------------------|----------------|
| =====                  |                           |                  |                   |                |
| from unit 1 to unit 2  |                           |                  |                   |                |
| 1. BD ( 1)Se 1 - N 4   | /622. RY*( 1) N 27        | 0.61             | 1.89              | 0.031          |
| 1. BD ( 1)Se 1 - N 4   | /624. RY*( 3) N 27        | 0.11             | 1.50              | 0.011          |
| 2. BD ( 1)Se 1 - C 9   | /622. RY*( 1) N 27        | 0.27             | 1.86              | 0.020          |
| 16. BD ( 1)C 9 - C 16  | /622. RY*( 1) N 27        | 0.05             | 2.00              | 0.009          |
| 16. BD ( 1)C 9 - C 16  | /624. RY*( 3) N 27        | 0.07             | 1.61              | 0.010          |
| 28. BD ( 1)C 16 - H 17 | /107. LP ( 2) N 27        | 0.51             | 0.38              | 0.020          |
| 60. CR ( 3)Se 1        | /942. BD*( 1) N 27 - C 28 | 0.07             | 11.39             | 0.025          |
| 60. CR ( 3)Se 1        | /943. BD*( 1) N 27 - C 29 | 0.07             | 11.39             | 0.025          |
| 98. LP ( 1)Se 1        | /107. LP ( 2) N 27        | 0.46             | 0.57              | 0.024          |
| 98. LP ( 1)Se 1        | /622. RY*( 1) N 27        | 0.09             | 1.98              | 0.012          |
| 98. LP ( 1)Se 1        | /942. BD*( 1) N 27 - C 28 | 0.61             | 1.39              | 0.026          |
| 98. LP ( 1)Se 1        | /943. BD*( 1) N 27 - C 29 | 0.61             | 1.39              | 0.026          |
| 99. LP ( 2)Se 1        | /649. RY*( 2) C 28        | 0.05             | 1.71              | 0.009          |
| 99. LP ( 2)Se 1        | /675. RY*( 2) C 29        | 0.05             | 1.71              | 0.009          |
| 99. LP ( 2)Se 1        | /942. BD*( 1) N 27 - C 28 | 0.24             | 0.89              | 0.014          |
| 99. LP ( 2)Se 1        | /943. BD*( 1) N 27 - C 29 | 0.24             | 0.89              | 0.014          |
| 99. LP ( 2)Se 1        | /944. BD*( 1) C 28 - C 30 | 0.10             | 0.93              | 0.009          |
| 99. LP ( 2)Se 1        | /947. BD*( 1) C 29 - C 32 | 0.10             | 0.93              | 0.009          |

from unit 2 to unit 1

|                          |                           |       |       |       |
|--------------------------|---------------------------|-------|-------|-------|
| 37. BD ( 1) N 27 - C 28  | /906. BD*( 1)Se 1 - N 4   | 0.24  | 1.08  | 0.015 |
| 38. BD ( 1) N 27 - C 29  | /906. BD*( 1)Se 1 - N 4   | 0.24  | 1.08  | 0.015 |
| 39. BD ( 1) C 28 - C 30  | /906. BD*( 1)Se 1 - N 4   | 0.17  | 0.97  | 0.012 |
| 42. BD ( 1) C 29 - C 32  | /906. BD*( 1)Se 1 - N 4   | 0.17  | 0.97  | 0.012 |
| 89. CR ( 1) N 27         | /906. BD*( 1)Se 1 - N 4   | 0.11  | 14.39 | 0.036 |
| 106. LP ( 1) N 27        | /110. RY*( 1)Se 1         | 1.06  | 1.70  | 0.039 |
| 106. LP ( 1) N 27        | /113. RY*( 4)Se 1         | 0.07  | 1.37  | 0.009 |
| 106. LP ( 1) N 27        | /116. RY*( 7)Se 1         | 0.15  | 1.91  | 0.016 |
| 106. LP ( 1) N 27        | /171. RY*( 1) N 4         | 0.07  | 1.70  | 0.010 |
| 106. LP ( 1) N 27        | /424. RY*( 5) C 16        | 0.09  | 2.24  | 0.013 |
| 106. LP ( 1) N 27        | /446. RY*( 1) H 17        | 0.06  | 1.30  | 0.008 |
| 106. LP ( 1) N 27        | /447. RY*( 2) H 17        | 0.06  | 2.92  | 0.012 |
| 106. LP ( 1) N 27        | /906. BD*( 1)Se 1 - N 4   | 16.23 | 0.60  | 0.089 |
| 106. LP ( 1) N 27        | /907. BD*( 1)Se 1 - C 9   | 0.90  | 0.65  | 0.022 |
| 106. LP ( 1) N 27        | /914. BD*( 1) C 5 - C 9   | 0.36  | 1.05  | 0.018 |
| 106. LP ( 1) N 27        | /933. BD*( 1) C 16 - H 17 | 0.32  | 0.95  | 0.016 |
| 106. LP ( 1) N 27        | /934. BD*( 1) C 16 - C 22 | 0.27  | 1.09  | 0.016 |
| 107. LP ( 2) N 27        | /119. RY*( 10)Se 1        | 0.06  | 2.44  | 0.014 |
| 107. LP ( 2) N 27        | /906. BD*( 1)Se 1 - N 4   | 0.63  | 0.38  | 0.016 |
| 107. LP ( 2) N 27        | /933. BD*( 1) C 16 - H 17 | 0.44  | 0.73  | 0.020 |
| 107. LP ( 2) N 27        | /934. BD*( 1) C 16 - C 22 | 0.08  | 0.87  | 0.009 |
| 945. BD*( 2) C 28 - C 30 | /935. BD*( 2) C 16 - C 22 | 0.12  | 0.02  | 0.002 |
| 948. BD*( 2) C 29 - C 32 | /935. BD*( 2) C 16 - C 22 | 0.12  | 0.02  | 0.002 |

### 3.DABCO

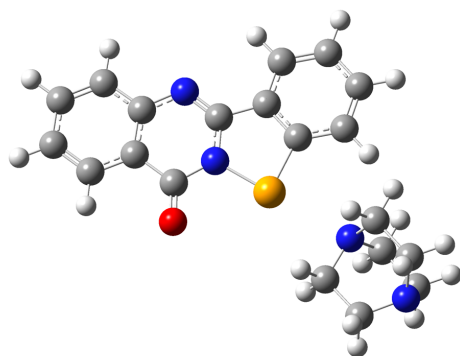

Sum of electronic and zero-point Energies= -3469.679848  
Sum of electronic and thermal Energies= -3469.658725  
Sum of electronic and thermal Enthalpies= -3469.657781  
Sum of electronic and thermal Free Energies= -3469.733539

|    |    |           |             |              |
|----|----|-----------|-------------|--------------|
| 1  | Se |           |             |              |
| 2  | C  | 4.0932446 |             |              |
| 3  | H  | 1.0822458 | 132.2439593 |              |
| 4  | N  | 1.8794178 | 63.1590402  | 0.1182993    |
| 5  | C  | 1.3900384 | 13.4846917  | 0.0614651    |
| 6  | C  | 1.3800925 | 105.8503125 | -179.8836063 |
| 7  | H  | 1.0819517 | 120.1117509 | -179.9926896 |
| 8  | C  | 1.3825573 | 118.9508715 | -179.8084309 |
| 9  | C  | 1.3943430 | 120.5750374 | -0.0409846   |
| 10 | C  | 2.4760273 | 141.9345246 | 179.8301809  |
| 11 | H  | 1.0821996 | 87.6118868  | 179.9420377  |
| 12 | N  | 2.3530665 | 143.9676194 | -0.2945650   |
| 13 | O  | 1.2163530 | 120.4117697 | -0.1729064   |
| 14 | C  | 2.3993231 | 120.3024151 | -0.0676704   |
| 15 | H  | 1.0830553 | 149.3827632 | -179.9816182 |
| 16 | C  | 1.3883744 | 120.0563014 | -0.0673819   |
| 17 | H  | 1.0791317 | 120.6247502 | -179.8668638 |
| 18 | C  | 1.3768822 | 87.9877794  | -179.6860699 |

|    |   |           |             |              |
|----|---|-----------|-------------|--------------|
| 19 | C | 1.2890526 | 28.5908040  | 0.2799689    |
| 20 | C | 1.3734401 | 150.7603532 | -0.0824127   |
| 21 | H | 1.0820855 | 120.2582180 | -179.9713195 |
| 22 | C | 1.3832806 | 118.9925804 | 0.0659712    |
| 23 | H | 1.0828681 | 119.2475927 | -179.9907044 |
| 24 | C | 1.3733016 | 91.0384875  | 0.0125731    |
| 25 | H | 1.0819610 | 121.5596005 | -179.9908094 |
| 26 | C | 1.3983032 | 30.6874715  | -0.0378243   |
| 27 | C | 3.2102700 | 152.3722489 | 178.3711084  |
| 28 | C | 2.3864880 | 80.6427329  | -146.3131208 |
| 29 | C | 2.3856672 | 82.4901728  | 152.7586659  |
| 30 | C | 1.5522755 | 169.9301789 | -166.0138786 |
| 31 | H | 1.0915815 | 71.9782612  | -53.3519730  |
| 32 | H | 1.0915620 | 75.0226046  | 60.9124951   |
| 33 | H | 1.0916048 | 144.1778233 | -48.5028190  |
| 34 | H | 1.0912871 | 89.6981792  | 71.6426503   |
| 35 | C | 1.5541576 | 89.8024400  | -176.4659480 |
| 36 | C | 1.5545647 | 89.7756255  | 173.3147628  |
| 37 | H | 1.0915760 | 144.2729276 | 45.5344590   |
| 38 | H | 1.0912488 | 89.7387716  | -74.7914684  |
| 39 | H | 1.0913510 | 111.1903218 | 109.4225511  |
| 40 | H | 1.0913557 | 111.2005528 | -130.8594872 |
| 41 | H | 1.0916247 | 111.1876296 | 150.0336050  |
| 42 | H | 1.0914111 | 111.1875177 | -90.2446733  |
| 43 | H | 1.0916227 | 111.1745824 | -150.1369449 |
| 44 | H | 1.0914245 | 111.1803025 | 90.1482321   |
| 45 | N | 1.4661715 | 35.6624677  | 47.6659965   |
| 46 | N | 1.4595220 | 110.0849545 | -29.9906425  |

## Second Order Perturbation Theory Analysis of Fock Matrix in NBO Basis

Threshold for printing: 0.50 kcal/mol  
 (Intermolecular threshold: 0.05 kcal/mol)

| Donor NBO (i)          | Acceptor NBO (j)          | E(2) E(j)-E(i) F(i,j) |       |       |
|------------------------|---------------------------|-----------------------|-------|-------|
|                        |                           | kcal/mol              | a.u.  | a.u.  |
| =====                  |                           |                       |       |       |
| from unit 1 to unit 2  |                           |                       |       |       |
| 1. BD ( 1)Se 1 - N 4   | /833. RY*( 1) N 45        | 0.54                  | 1.77  | 0.028 |
| 1. BD ( 1)Se 1 - N 4   | /834. RY*( 2) N 45        | 0.06                  | 2.39  | 0.011 |
| 2. BD ( 2)Se 1 - N 4   | /835. RY*( 3) N 45        | 0.14                  | 1.68  | 0.015 |
| 2. BD ( 2)Se 1 - N 4   | /848. RY*( 16) N 45       | 0.06                  | 4.06  | 0.015 |
| 3. BD ( 1)Se 1 - C 9   | /833. RY*( 1) N 45        | 0.24                  | 1.73  | 0.018 |
| 30. BD ( 1)C 16 - H 17 | /926. BD*( 1) C 27 - N 45 | 0.14                  | 1.02  | 0.011 |
| 30. BD ( 1)C 16 - H 17 | /927. BD*( 1) C 28 - H 33 | 0.07                  | 1.06  | 0.008 |
| 30. BD ( 1)C 16 - H 17 | /929. BD*( 1) C 28 - C 35 | 0.06                  | 1.01  | 0.007 |
| 30. BD ( 1)C 16 - H 17 | /931. BD*( 1) C 29 - C 36 | 0.06                  | 1.01  | 0.007 |
| 30. BD ( 1)C 16 - H 17 | /932. BD*( 1) C 29 - H 37 | 0.09                  | 1.06  | 0.009 |
| 99. LP ( 1)Se 1        | /923. BD*( 1) C 27 - C 30 | 0.80                  | 1.20  | 0.028 |
| 99. LP ( 1)Se 1        | /930. BD*( 1) C 28 - N 45 | 0.43                  | 1.20  | 0.020 |
| 99. LP ( 1)Se 1        | /934. BD*( 1) C 29 - N 45 | 0.54                  | 1.20  | 0.023 |
| 100. LP ( 2)Se 1       | /625. RY*( 9) C 27        | 0.11                  | 1.30  | 0.013 |
| 100. LP ( 2)Se 1       | /644. RY*( 2) C 28        | 0.12                  | 1.48  | 0.015 |
| 100. LP ( 2)Se 1       | /645. RY*( 3) C 28        | 0.32                  | 1.37  | 0.023 |
| 100. LP ( 2)Se 1       | /648. RY*( 6) C 28        | 0.05                  | 2.16  | 0.011 |
| 100. LP ( 2)Se 1       | /651. RY*( 9) C 28        | 0.07                  | 1.71  | 0.012 |
| 100. LP ( 2)Se 1       | /658. RY*( 16) C 28       | 0.08                  | 3.16  | 0.017 |
| 100. LP ( 2)Se 1       | /659. RY*( 17) C 28       | 0.09                  | 20.42 | 0.046 |
| 100. LP ( 2)Se 1       | /670. RY*( 2) C 29        | 0.09                  | 1.48  | 0.012 |
| 100. LP ( 2)Se 1       | /671. RY*( 3) C 29        | 0.22                  | 1.37  | 0.019 |
| 100. LP ( 2)Se 1       | /672. RY*( 4) C 29        | 0.06                  | 2.07  | 0.012 |
| 100. LP ( 2)Se 1       | /677. RY*( 9) C 29        | 0.07                  | 1.68  | 0.012 |

|                        |                           |      |       |       |
|------------------------|---------------------------|------|-------|-------|
| 100. LP ( 2)Se 1       | /687. RY*( 19) C 29       | 0.10 | 20.34 | 0.049 |
| 100. LP ( 2)Se 1       | /721. RY*( 1) H 31        | 0.30 | 1.13  | 0.020 |
| 100. LP ( 2)Se 1       | /726. RY*( 1) H 32        | 0.27 | 1.11  | 0.019 |
| 100. LP ( 2)Se 1       | /736. RY*( 1) H 34        | 0.06 | 1.02  | 0.009 |
| 100. LP ( 2)Se 1       | /745. RY*( 5) C 35        | 0.05 | 2.24  | 0.012 |
| 100. LP ( 2)Se 1       | /834. RY*( 2) N 45        | 0.07 | 1.65  | 0.011 |
| 100. LP ( 2)Se 1       | /835. RY*( 3) N 45        | 2.04 | 1.33  | 0.056 |
| 100. LP ( 2)Se 1       | /837. RY*( 5) N 45        | 0.06 | 2.91  | 0.014 |
| 100. LP ( 2)Se 1       | /841. RY*( 9) N 45        | 0.29 | 4.21  | 0.038 |
| 100. LP ( 2)Se 1       | /848. RY*( 16) N 45       | 0.91 | 3.71  | 0.063 |
| 100. LP ( 2)Se 1       | /924. BD*( 1) C 27 - H 31 | 0.25 | 0.43  | 0.011 |
| 100. LP ( 2)Se 1       | /925. BD*( 1) C 27 - H 32 | 0.18 | 0.43  | 0.009 |
| 100. LP ( 2)Se 1       | /928. BD*( 1) C 28 - H 34 | 0.06 | 0.43  | 0.005 |
| 100. LP ( 2)Se 1       | /929. BD*( 1) C 28 - C 35 | 0.14 | 0.38  | 0.008 |
| 100. LP ( 2)Se 1       | /930. BD*( 1) C 28 - N 45 | 0.11 | 0.39  | 0.007 |
| 100. LP ( 2)Se 1       | /931. BD*( 1) C 29 - C 36 | 0.09 | 0.38  | 0.006 |
| 100. LP ( 2)Se 1       | /934. BD*( 1) C 29 - N 45 | 0.13 | 0.39  | 0.008 |
| 886. BD*( 2)Se 1 - N 4 | /625. RY*( 9) C 27        | 0.28 | 0.69  | 0.026 |
| 886. BD*( 2)Se 1 - N 4 | /644. RY*( 2) C 28        | 0.11 | 0.86  | 0.018 |
| 886. BD*( 2)Se 1 - N 4 | /645. RY*( 3) C 28        | 0.30 | 0.75  | 0.028 |
| 886. BD*( 2)Se 1 - N 4 | /646. RY*( 4) C 28        | 0.05 | 1.48  | 0.016 |
| 886. BD*( 2)Se 1 - N 4 | /648. RY*( 6) C 28        | 0.11 | 1.55  | 0.024 |
| 886. BD*( 2)Se 1 - N 4 | /651. RY*( 9) C 28        | 0.10 | 1.10  | 0.020 |
| 886. BD*( 2)Se 1 - N 4 | /658. RY*( 16) C 28       | 0.11 | 2.55  | 0.032 |
| 886. BD*( 2)Se 1 - N 4 | /659. RY*( 17) C 28       | 0.09 | 19.80 | 0.079 |
| 886. BD*( 2)Se 1 - N 4 | /670. RY*( 2) C 29        | 0.08 | 0.86  | 0.015 |
| 886. BD*( 2)Se 1 - N 4 | /671. RY*( 3) C 29        | 0.18 | 0.75  | 0.022 |
| 886. BD*( 2)Se 1 - N 4 | /672. RY*( 4) C 29        | 0.10 | 1.45  | 0.022 |
| 886. BD*( 2)Se 1 - N 4 | /674. RY*( 6) C 29        | 0.08 | 1.62  | 0.021 |
| 886. BD*( 2)Se 1 - N 4 | /677. RY*( 9) C 29        | 0.09 | 1.07  | 0.018 |
| 886. BD*( 2)Se 1 - N 4 | /687. RY*( 19) C 29       | 0.11 | 19.72 | 0.084 |
| 886. BD*( 2)Se 1 - N 4 | /721. RY*( 1) H 31        | 0.45 | 0.51  | 0.028 |
| 886. BD*( 2)Se 1 - N 4 | /726. RY*( 1) H 32        | 0.40 | 0.50  | 0.026 |
| 886. BD*( 2)Se 1 - N 4 | /736. RY*( 1) H 34        | 0.05 | 0.40  | 0.009 |
| 886. BD*( 2)Se 1 - N 4 | /745. RY*( 5) C 35        | 0.06 | 1.62  | 0.018 |
| 886. BD*( 2)Se 1 - N 4 | /818. RY*( 1) H 42        | 0.06 | 0.42  | 0.010 |
| 886. BD*( 2)Se 1 - N 4 | /828. RY*( 1) H 44        | 0.06 | 0.42  | 0.009 |
| 886. BD*( 2)Se 1 - N 4 | /834. RY*( 2) N 45        | 0.09 | 1.04  | 0.018 |
| 886. BD*( 2)Se 1 - N 4 | /835. RY*( 3) N 45        | 2.87 | 0.72  | 0.084 |
| 886. BD*( 2)Se 1 - N 4 | /841. RY*( 9) N 45        | 0.30 | 3.60  | 0.060 |
| 886. BD*( 2)Se 1 - N 4 | /848. RY*( 16) N 45       | 1.14 | 3.10  | 0.110 |
| 886. BD*( 2)Se 1 - N 4 | /855. RY*( 23) N 45       | 0.08 | 3.59  | 0.031 |

from unit 2 to unit 1

|                         |                           |      |      |       |
|-------------------------|---------------------------|------|------|-------|
| 40. BD ( 1) C 27 - H 31 | /111. RY*( 6)Se 1         | 0.06 | 1.97 | 0.010 |
| 40. BD ( 1) C 27 - H 31 | /885. BD*( 1)Se 1 - N 4   | 0.10 | 0.73 | 0.008 |
| 40. BD ( 1) C 27 - H 31 | /887. BD*( 1)Se 1 - C 9   | 0.14 | 0.79 | 0.009 |
| 41. BD ( 1) C 27 - H 32 | /111. RY*( 6)Se 1         | 0.08 | 1.97 | 0.011 |
| 41. BD ( 1) C 27 - H 32 | /885. BD*( 1)Se 1 - N 4   | 0.08 | 0.73 | 0.007 |
| 41. BD ( 1) C 27 - H 32 | /887. BD*( 1)Se 1 - C 9   | 0.10 | 0.79 | 0.008 |
| 42. BD ( 1) C 27 - N 45 | /885. BD*( 1)Se 1 - N 4   | 0.16 | 0.94 | 0.011 |
| 43. BD ( 1) C 28 - H 33 | /441. RY*( 1) H 17        | 0.20 | 1.57 | 0.016 |
| 43. BD ( 1) C 28 - H 33 | /914. BD*( 1) C 16 - H 17 | 0.24 | 1.08 | 0.014 |
| 44. BD ( 1) C 28 - H 34 | /111. RY*( 6)Se 1         | 0.11 | 1.97 | 0.013 |
| 45. BD ( 1) C 28 - C 35 | /885. BD*( 1)Se 1 - N 4   | 0.10 | 0.83 | 0.008 |
| 46. BD ( 1) C 28 - N 45 | /885. BD*( 1)Se 1 - N 4   | 0.09 | 0.94 | 0.008 |
| 46. BD ( 1) C 28 - N 45 | /914. BD*( 1) C 16 - H 17 | 0.05 | 1.29 | 0.007 |
| 47. BD ( 1) C 29 - C 36 | /885. BD*( 1)Se 1 - N 4   | 0.11 | 0.83 | 0.009 |
| 48. BD ( 1) C 29 - H 37 | /441. RY*( 1) H 17        | 0.25 | 1.57 | 0.018 |
| 48. BD ( 1) C 29 - H 37 | /914. BD*( 1) C 16 - H 17 | 0.34 | 1.08 | 0.017 |
| 49. BD ( 1) C 29 - H 38 | /111. RY*( 6)Se 1         | 0.05 | 1.97 | 0.009 |

|                         |                           |       |       |       |
|-------------------------|---------------------------|-------|-------|-------|
| 50. BD ( 1) C 29 - N 45 | /885. BD*( 1)Se 1 - N 4   | 0.08  | 0.94  | 0.008 |
| 50. BD ( 1) C 29 - N 45 | /914. BD*( 1) C 16 - H 17 | 0.06  | 1.29  | 0.008 |
| 97. CR ( 1) N 45        | /885. BD*( 1)Se 1 - N 4   | 0.06  | 14.42 | 0.026 |
| 104. LP ( 1) N 45       | /106. RY*( 1)Se 1         | 0.84  | 1.55  | 0.033 |
| 104. LP ( 1) N 45       | /108. RY*( 3)Se 1         | 0.19  | 1.35  | 0.015 |
| 104. LP ( 1) N 45       | /113. RY*( 8)Se 1         | 0.06  | 2.20  | 0.010 |
| 104. LP ( 1) N 45       | /116. RY*( 11)Se 1        | 0.08  | 2.08  | 0.012 |
| 104. LP ( 1) N 45       | /275. RY*( 1) C 9         | 0.05  | 1.69  | 0.009 |
| 104. LP ( 1) N 45       | /885. BD*( 1)Se 1 - N 4   | 10.39 | 0.54  | 0.068 |
| 104. LP ( 1) N 45       | /887. BD*( 1)Se 1 - C 9   | 0.70  | 0.60  | 0.019 |
| 104. LP ( 1) N 45       | /894. BD*( 1) C 5 - C 9   | 0.14  | 0.99  | 0.011 |
| 104. LP ( 1) N 45       | /915. BD*( 1) C 16 - C 22 | 0.07  | 1.03  | 0.008 |

### 3. quinuclidine

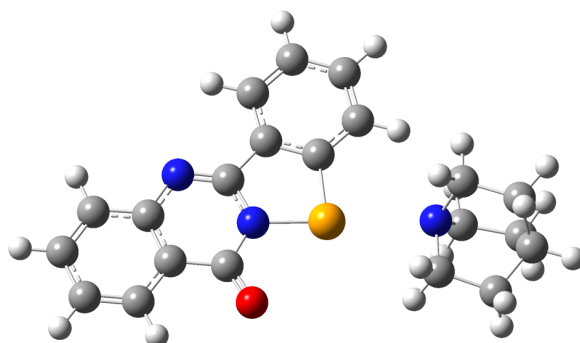

Sum of electronic and zero-point Energies= -3453.649486  
Sum of electronic and thermal Energies= -3453.628160  
Sum of electronic and thermal Enthalpies= -3453.627216  
Sum of electronic and thermal Free Energies= -3453.703126

|    |    |           |             |              |
|----|----|-----------|-------------|--------------|
| 1  | Se |           |             |              |
| 2  | C  | 4.0942624 |             |              |
| 3  | H  | 1.0822505 | 132.2309103 |              |
| 4  | N  | 1.8817210 | 63.1100182  | -0.0690438   |
| 5  | C  | 1.3900537 | 13.4873151  | -0.0158606   |
| 6  | C  | 1.3800523 | 105.8578719 | 179.9366282  |
| 7  | H  | 1.0819672 | 120.1226171 | 179.9922656  |
| 8  | C  | 1.3824740 | 118.9840238 | 179.9627395  |
| 9  | C  | 1.3944558 | 120.5978022 | 0.0421794    |
| 10 | C  | 2.4762285 | 141.9491909 | 179.9677112  |
| 11 | H  | 1.0822081 | 87.6005105  | -179.9395081 |
| 12 | N  | 2.3535102 | 143.9608441 | 0.0684630    |
| 13 | O  | 1.2163973 | 120.4505540 | 0.0076146    |
| 14 | C  | 2.3993082 | 120.3092525 | 0.0558576    |
| 15 | H  | 1.0830729 | 149.3865527 | -179.9907300 |
| 16 | C  | 1.3884127 | 120.0075791 | 0.0488852    |
| 17 | H  | 1.0789642 | 120.6272836 | 179.8667197  |
| 18 | C  | 1.3766919 | 88.0004608  | 179.9771539  |
| 19 | C  | 1.2893375 | 28.5567071  | -0.0295614   |
| 20 | C  | 1.3734518 | 150.7695978 | 0.0491041    |
| 21 | H  | 1.0820982 | 120.2616590 | -179.9878506 |
| 22 | C  | 1.3832579 | 119.0243089 | -0.0488513   |
| 23 | H  | 1.0828857 | 119.2358600 | 179.9903955  |
| 24 | C  | 1.3732721 | 91.0335438  | 0.0065269    |
| 25 | H  | 1.0819752 | 121.5602207 | -179.9990747 |
| 26 | C  | 1.3983061 | 30.6880168  | 0.0631682    |
| 27 | C  | 3.2010895 | 152.2892376 | 178.6405585  |

|    |   |           |             |              |
|----|---|-----------|-------------|--------------|
| 28 | C | 2.3904863 | 81.6611740  | -150.5956194 |
| 29 | C | 2.3911800 | 80.6498604  | 148.3704996  |
| 30 | C | 1.5471353 | 169.9952631 | 145.1830800  |
| 31 | H | 1.0913608 | 77.5900979  | -61.8983066  |
| 32 | H | 1.0914088 | 68.9462593  | 51.9787765   |
| 33 | H | 1.0913882 | 143.4255918 | -53.7385043  |
| 34 | H | 1.0909755 | 92.4287578  | 69.6619084   |
| 35 | C | 1.5488453 | 89.2853468  | -178.7499831 |
| 36 | C | 1.5488193 | 93.8043276  | 172.5837293  |
| 37 | H | 1.0912234 | 143.6350290 | 38.4020622   |
| 38 | H | 1.0911288 | 86.7827896  | -76.1498345  |
| 39 | C | 1.5304281 | 108.0198118 | 39.6323658   |
| 40 | H | 1.0914053 | 110.6469557 | 160.5542493  |
| 41 | H | 1.0920524 | 110.8240549 | -80.7731807  |
| 42 | H | 1.0916372 | 110.6870740 | 157.3024265  |
| 43 | H | 1.0920673 | 110.8211941 | -83.9863851  |
| 44 | H | 1.0923404 | 110.8378178 | -143.8301098 |
| 45 | H | 1.0914816 | 110.6866858 | 97.4653883   |
| 46 | H | 1.0904053 | 110.3497572 | 175.4315766  |
| 47 | N | 1.4662761 | 35.4684864  | 50.3461613   |

### Second Order Perturbation Theory Analysis of Fock Matrix in NBO Basis

Threshold for printing: 0.50 kcal/mol

(Intermolecular threshold: 0.05 kcal/mol)

| Donor NBO (i)           | Acceptor NBO (j)          | E(2) E(j)-E(i) F(i,j) |       |       |
|-------------------------|---------------------------|-----------------------|-------|-------|
|                         |                           | kcal/mol              | a.u.  | a.u.  |
| =====                   |                           |                       |       |       |
| from unit 1 to unit 2   |                           |                       |       |       |
| 1. BD ( 1)Se 1 - N 4    | /864. RY*( 1) N 47        | 0.57                  | 1.77  | 0.028 |
| 1. BD ( 1)Se 1 - N 4    | /865. RY*( 2) N 47        | 0.06                  | 2.51  | 0.011 |
| 2. BD ( 2)Se 1 - N 4    | /866. RY*( 3) N 47        | 0.13                  | 1.71  | 0.015 |
| 2. BD ( 2)Se 1 - N 4    | /879. RY*( 16) N 47       | 0.06                  | 4.05  | 0.015 |
| 3. BD ( 1)Se 1 - C 9    | /627. RY*( 11) C 27       | 0.06                  | 2.86  | 0.012 |
| 3. BD ( 1)Se 1 - C 9    | /864. RY*( 1) N 47        | 0.25                  | 1.73  | 0.019 |
| 30. BD ( 1) C 16 - H 17 | /931. BD*( 1) C 27 - N 47 | 0.13                  | 1.03  | 0.010 |
| 30. BD ( 1) C 16 - H 17 | /932. BD*( 1) C 28 - H 33 | 0.08                  | 1.06  | 0.008 |
| 30. BD ( 1) C 16 - H 17 | /934. BD*( 1) C 28 - C 35 | 0.09                  | 1.02  | 0.009 |
| 30. BD ( 1) C 16 - H 17 | /937. BD*( 1) C 29 - H 37 | 0.08                  | 1.06  | 0.008 |
| 100. LP ( 1)Se 1        | /928. BD*( 1) C 27 - C 30 | 0.83                  | 1.21  | 0.028 |
| 100. LP ( 1)Se 1        | /935. BD*( 1) C 28 - N 47 | 0.53                  | 1.21  | 0.023 |
| 100. LP ( 1)Se 1        | /939. BD*( 1) C 29 - N 47 | 0.45                  | 1.21  | 0.021 |
| 101. LP ( 2)Se 1        | /625. RY*( 9) C 27        | 0.11                  | 1.28  | 0.013 |
| 101. LP ( 2)Se 1        | /645. RY*( 3) C 28        | 0.29                  | 1.34  | 0.021 |
| 101. LP ( 2)Se 1        | /651. RY*( 9) C 28        | 0.06                  | 1.53  | 0.010 |
| 101. LP ( 2)Se 1        | /658. RY*( 16) C 28       | 0.06                  | 2.44  | 0.013 |
| 101. LP ( 2)Se 1        | /659. RY*( 17) C 28       | 0.09                  | 20.47 | 0.047 |
| 101. LP ( 2)Se 1        | /670. RY*( 2) C 29        | 0.07                  | 1.46  | 0.011 |
| 101. LP ( 2)Se 1        | /671. RY*( 3) C 29        | 0.39                  | 1.32  | 0.025 |
| 101. LP ( 2)Se 1        | /674. RY*( 6) C 29        | 0.11                  | 2.29  | 0.017 |
| 101. LP ( 2)Se 1        | /676. RY*( 8) C 29        | 0.05                  | 1.72  | 0.010 |
| 101. LP ( 2)Se 1        | /677. RY*( 9) C 29        | 0.05                  | 1.33  | 0.009 |
| 101. LP ( 2)Se 1        | /684. RY*( 16) C 29       | 0.06                  | 2.61  | 0.013 |
| 101. LP ( 2)Se 1        | /687. RY*( 19) C 29       | 0.09                  | 20.56 | 0.045 |
| 101. LP ( 2)Se 1        | /721. RY*( 1) H 31        | 0.25                  | 1.18  | 0.019 |
| 101. LP ( 2)Se 1        | /726. RY*( 1) H 32        | 0.29                  | 1.19  | 0.020 |
| 101. LP ( 2)Se 1        | /747. RY*( 7) C 35        | 0.05                  | 2.01  | 0.011 |
| 101. LP ( 2)Se 1        | /773. RY*( 7) C 36        | 0.09                  | 2.17  | 0.015 |
| 101. LP ( 2)Se 1        | /866. RY*( 3) N 47        | 1.87                  | 1.36  | 0.054 |
| 101. LP ( 2)Se 1        | /868. RY*( 5) N 47        | 0.05                  | 2.82  | 0.013 |
| 101. LP ( 2)Se 1        | /872. RY*( 9) N 47        | 0.26                  | 4.10  | 0.035 |
| 101. LP ( 2)Se 1        | /879. RY*( 16) N 47       | 0.88                  | 3.70  | 0.062 |



|                        |                           |      |       |       |
|------------------------|---------------------------|------|-------|-------|
| 101. LP ( 2)Se 1       | /929. BD*( 1) C 27 - H 31 | 0.11 | 0.43  | 0.007 |
| 101. LP ( 2)Se 1       | /930. BD*( 1) C 27 - H 32 | 0.32 | 0.44  | 0.013 |
| 101. LP ( 2)Se 1       | /934. BD*( 1) C 28 - C 35 | 0.10 | 0.39  | 0.007 |
| 101. LP ( 2)Se 1       | /935. BD*( 1) C 28 - N 47 | 0.12 | 0.39  | 0.007 |
| 101. LP ( 2)Se 1       | /936. BD*( 1) C 29 - C 36 | 0.14 | 0.39  | 0.008 |
| 101. LP ( 2)Se 1       | /939. BD*( 1) C 29 - N 47 | 0.13 | 0.39  | 0.008 |
| 891. BD*( 2)Se 1 - N 4 | /625. RY*( 9) C 27        | 0.29 | 0.67  | 0.026 |
| 891. BD*( 2)Se 1 - N 4 | /645. RY*( 3) C 28        | 0.25 | 0.72  | 0.025 |
| 891. BD*( 2)Se 1 - N 4 | /646. RY*( 4) C 28        | 0.05 | 2.07  | 0.019 |
| 891. BD*( 2)Se 1 - N 4 | /647. RY*( 5) C 28        | 0.08 | 1.44  | 0.020 |
| 891. BD*( 2)Se 1 - N 4 | /651. RY*( 9) C 28        | 0.11 | 0.91  | 0.019 |
| 891. BD*( 2)Se 1 - N 4 | /658. RY*( 16) C 28       | 0.12 | 1.83  | 0.027 |
| 891. BD*( 2)Se 1 - N 4 | /659. RY*( 17) C 28       | 0.10 | 19.86 | 0.081 |
| 891. BD*( 2)Se 1 - N 4 | /670. RY*( 2) C 29        | 0.06 | 0.85  | 0.013 |
| 891. BD*( 2)Se 1 - N 4 | /671. RY*( 3) C 29        | 0.37 | 0.71  | 0.030 |
| 891. BD*( 2)Se 1 - N 4 | /674. RY*( 6) C 29        | 0.18 | 1.68  | 0.032 |
| 891. BD*( 2)Se 1 - N 4 | /676. RY*( 8) C 29        | 0.05 | 1.10  | 0.014 |
| 891. BD*( 2)Se 1 - N 4 | /677. RY*( 9) C 29        | 0.11 | 0.72  | 0.017 |
| 891. BD*( 2)Se 1 - N 4 | /681. RY*( 13) C 29       | 0.07 | 1.69  | 0.019 |
| 891. BD*( 2)Se 1 - N 4 | /684. RY*( 16) C 29       | 0.07 | 2.00  | 0.022 |
| 891. BD*( 2)Se 1 - N 4 | /687. RY*( 19) C 29       | 0.09 | 19.95 | 0.078 |
| 891. BD*( 2)Se 1 - N 4 | /721. RY*( 1) H 31        | 0.34 | 0.57  | 0.026 |
| 891. BD*( 2)Se 1 - N 4 | /726. RY*( 1) H 32        | 0.45 | 0.58  | 0.030 |
| 891. BD*( 2)Se 1 - N 4 | /773. RY*( 7) C 36        | 0.07 | 1.56  | 0.019 |
| 891. BD*( 2)Se 1 - N 4 | /844. RY*( 1) H 43        | 0.06 | 0.52  | 0.010 |
| 891. BD*( 2)Se 1 - N 4 | /866. RY*( 3) N 47        | 2.66 | 0.74  | 0.082 |
| 891. BD*( 2)Se 1 - N 4 | /872. RY*( 9) N 47        | 0.25 | 3.49  | 0.055 |
| 891. BD*( 2)Se 1 - N 4 | /875. RY*( 12) N 47       | 0.05 | 2.15  | 0.020 |
| 891. BD*( 2)Se 1 - N 4 | /879. RY*( 16) N 47       | 1.14 | 3.08  | 0.109 |

from unit 2 to unit 1

|                         |                           |       |       |       |
|-------------------------|---------------------------|-------|-------|-------|
| 40. BD ( 1) C 27 - H 31 | /111. RY*( 6)Se 1         | 0.08  | 1.97  | 0.011 |
| 40. BD ( 1) C 27 - H 31 | /890. BD*( 1)Se 1 - N 4   | 0.07  | 0.73  | 0.006 |
| 40. BD ( 1) C 27 - H 31 | /892. BD*( 1)Se 1 - C 9   | 0.07  | 0.79  | 0.007 |
| 41. BD ( 1) C 27 - H 32 | /108. RY*( 3)Se 1         | 0.05  | 1.56  | 0.008 |
| 41. BD ( 1) C 27 - H 32 | /111. RY*( 6)Se 1         | 0.06  | 1.97  | 0.010 |
| 41. BD ( 1) C 27 - H 32 | /890. BD*( 1)Se 1 - N 4   | 0.12  | 0.73  | 0.008 |
| 41. BD ( 1) C 27 - H 32 | /892. BD*( 1)Se 1 - C 9   | 0.20  | 0.79  | 0.011 |
| 42. BD ( 1) C 27 - N 47 | /890. BD*( 1)Se 1 - N 4   | 0.17  | 0.94  | 0.011 |
| 43. BD ( 1) C 28 - H 33 | /441. RY*( 1) H 17        | 0.26  | 1.57  | 0.018 |
| 43. BD ( 1) C 28 - H 33 | /919. BD*( 1) C 16 - H 17 | 0.38  | 1.08  | 0.018 |
| 44. BD ( 1) C 28 - H 34 | /111. RY*( 6)Se 1         | 0.12  | 1.97  | 0.014 |
| 45. BD ( 1) C 28 - C 35 | /890. BD*( 1)Se 1 - N 4   | 0.10  | 0.83  | 0.008 |
| 46. BD ( 1) C 28 - N 47 | /890. BD*( 1)Se 1 - N 4   | 0.09  | 0.94  | 0.008 |
| 46. BD ( 1) C 28 - N 47 | /919. BD*( 1) C 16 - H 17 | 0.07  | 1.29  | 0.008 |
| 47. BD ( 1) C 29 - C 36 | /890. BD*( 1)Se 1 - N 4   | 0.10  | 0.83  | 0.008 |
| 48. BD ( 1) C 29 - H 37 | /441. RY*( 1) H 17        | 0.21  | 1.57  | 0.016 |
| 48. BD ( 1) C 29 - H 37 | /919. BD*( 1) C 16 - H 17 | 0.24  | 1.08  | 0.014 |
| 49. BD ( 1) C 29 - H 38 | /112. RY*( 7)Se 1         | 0.07  | 2.13  | 0.011 |
| 50. BD ( 1) C 29 - N 47 | /890. BD*( 1)Se 1 - N 4   | 0.09  | 0.94  | 0.008 |
| 50. BD ( 1) C 29 - N 47 | /919. BD*( 1) C 16 - H 17 | 0.05  | 1.29  | 0.007 |
| 99. CR ( 1) N 47        | /890. BD*( 1)Se 1 - N 4   | 0.06  | 14.41 | 0.027 |
| 105. LP ( 1) N 47       | /106. RY*( 1)Se 1         | 0.87  | 1.56  | 0.034 |
| 105. LP ( 1) N 47       | /108. RY*( 3)Se 1         | 0.17  | 1.36  | 0.014 |
| 105. LP ( 1) N 47       | /110. RY*( 5)Se 1         | 0.06  | 2.06  | 0.010 |
| 105. LP ( 1) N 47       | /116. RY*( 11)Se 1        | 0.08  | 2.11  | 0.012 |
| 105. LP ( 1) N 47       | /275. RY*( 1) C 9         | 0.05  | 1.68  | 0.009 |
| 105. LP ( 1) N 47       | /890. BD*( 1)Se 1 - N 4   | 11.07 | 0.53  | 0.070 |
| 105. LP ( 1) N 47       | /892. BD*( 1)Se 1 - C 9   | 0.75  | 0.59  | 0.019 |
| 105. LP ( 1) N 47       | /899. BD*( 1) C 5 - C 9   | 0.14  | 0.98  | 0.011 |
| 105. LP ( 1) N 47       | /920. BD*( 1) C 16 - C 22 | 0.07  | 1.02  | 0.008 |

### 1a-DMAP-observed powder pattern

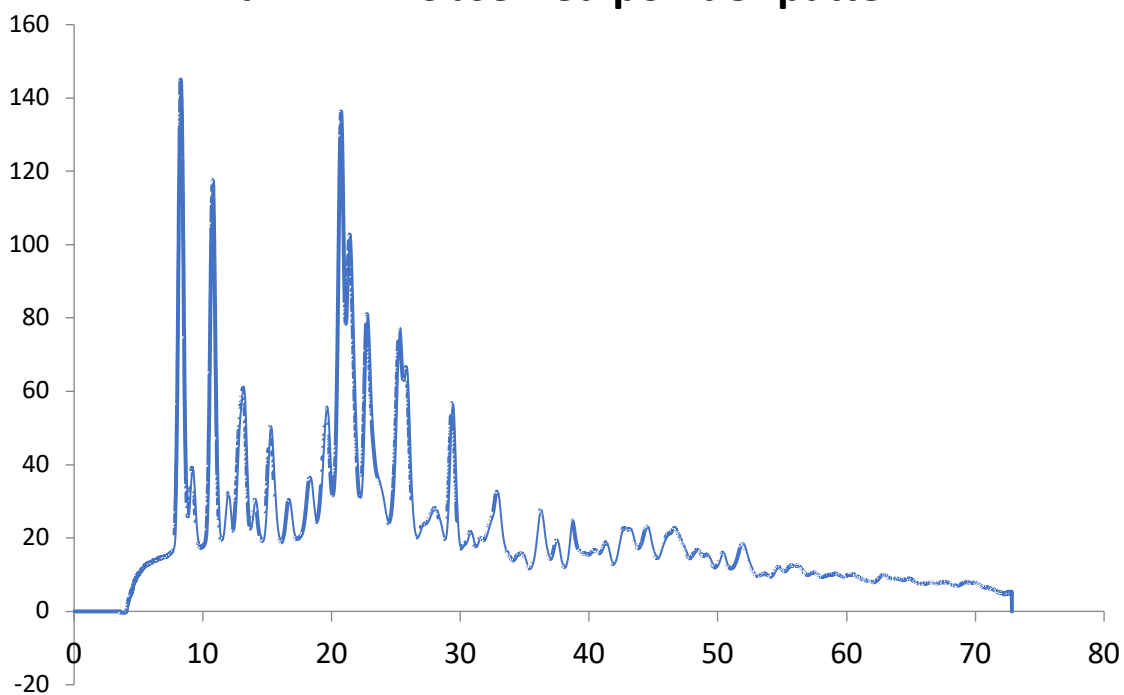

### 1a-DMAP-calculated powder pattern

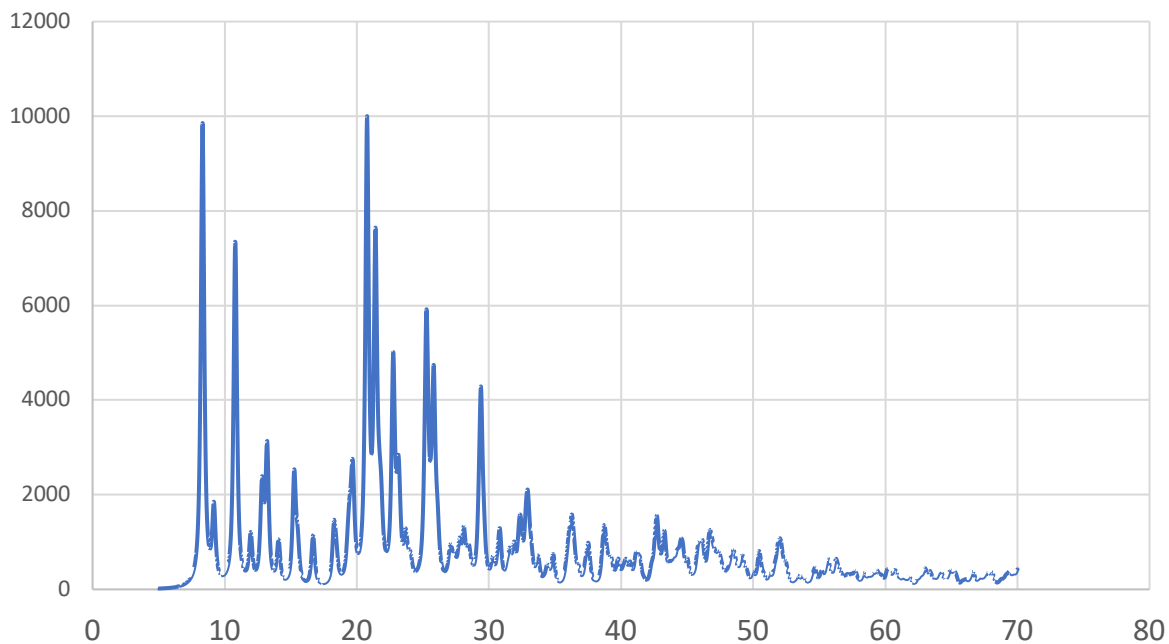

### 1b-DMAP-observed powder pattern

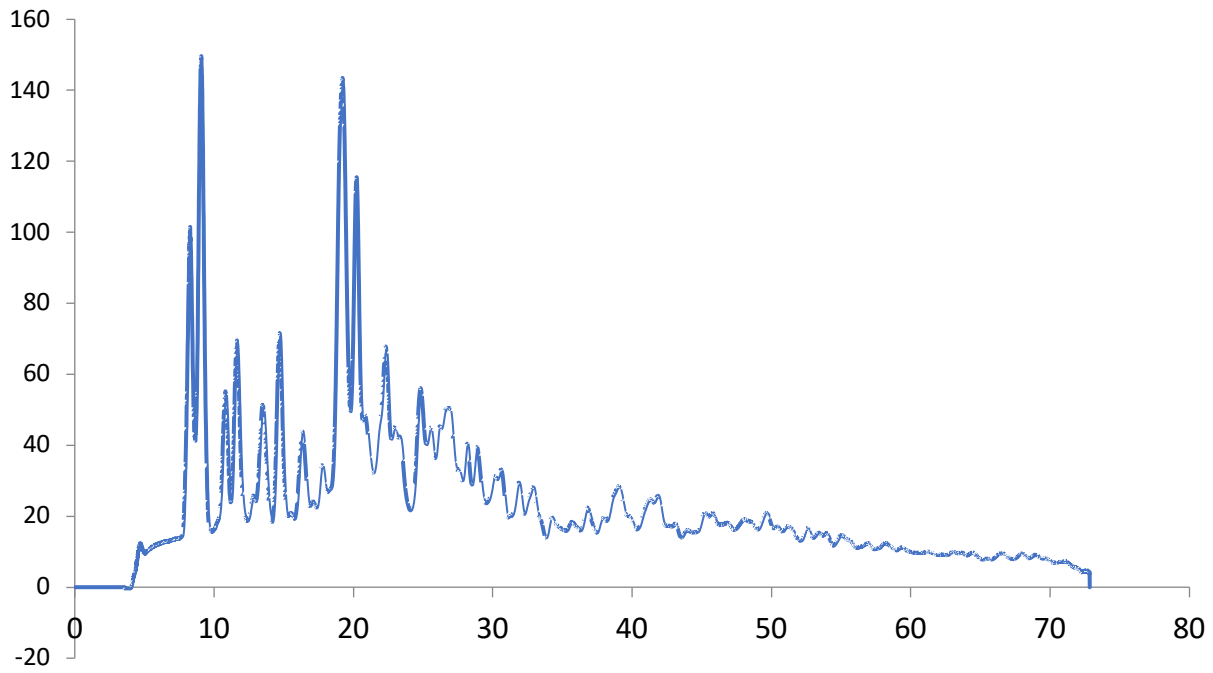

\*Peak at ca. 8.5° is from ca. 30% of 1b

### 1b-DMAP-calculated powder pattern

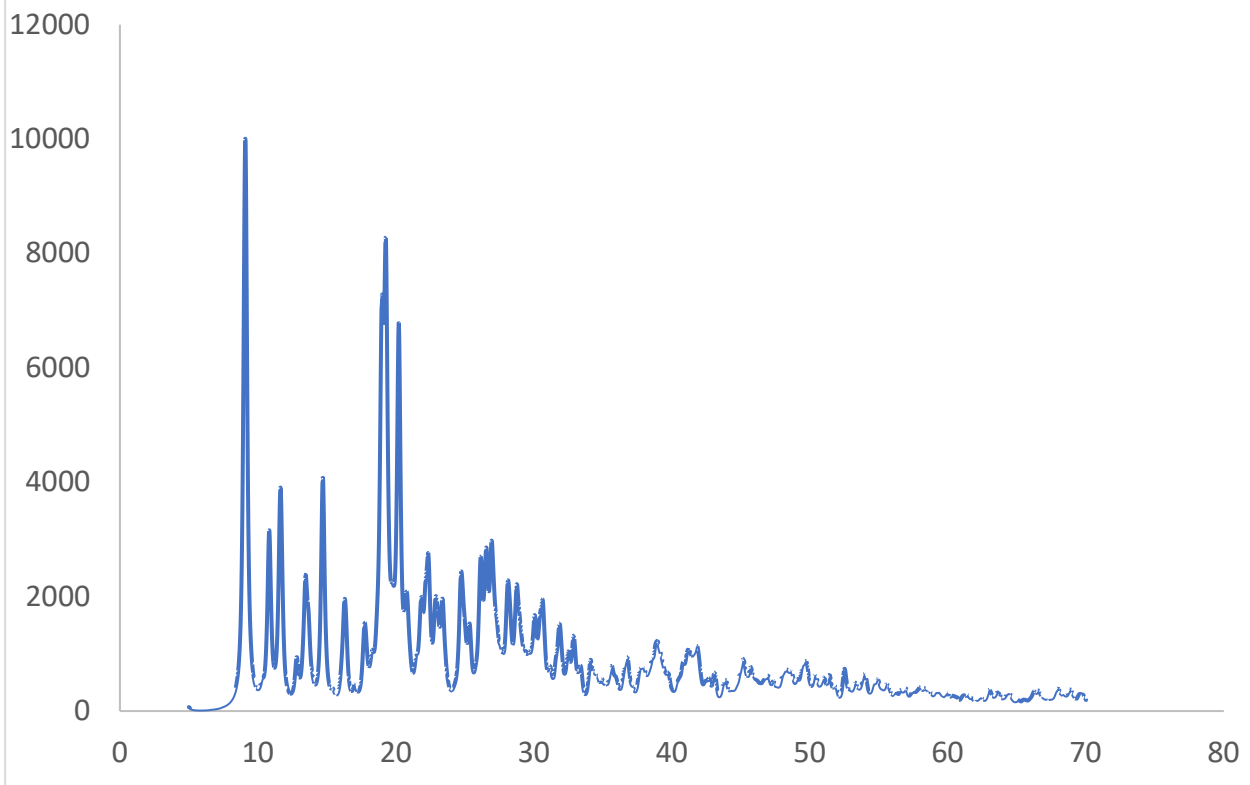

**1b-DMAP-H<sub>2</sub>O-observed powder pattern**

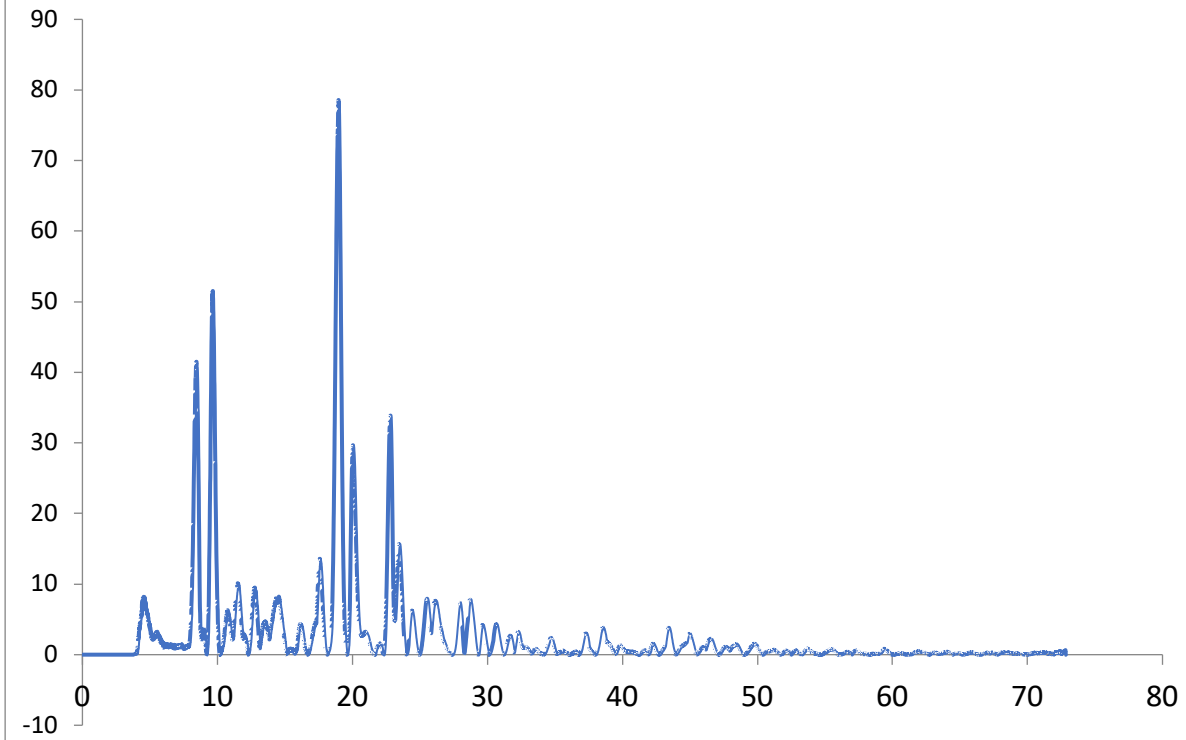

**1b-DMAP-H<sub>2</sub>O-calculated powder pattern**

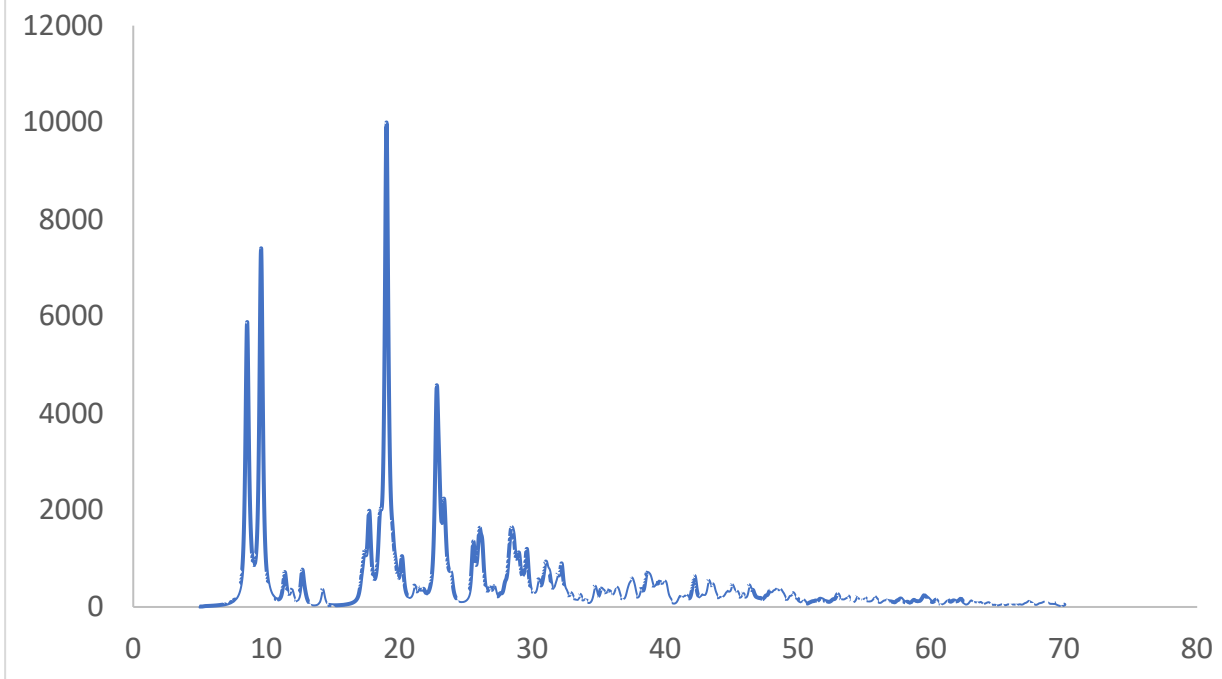

**1b-DABCO-observed powder pattern**

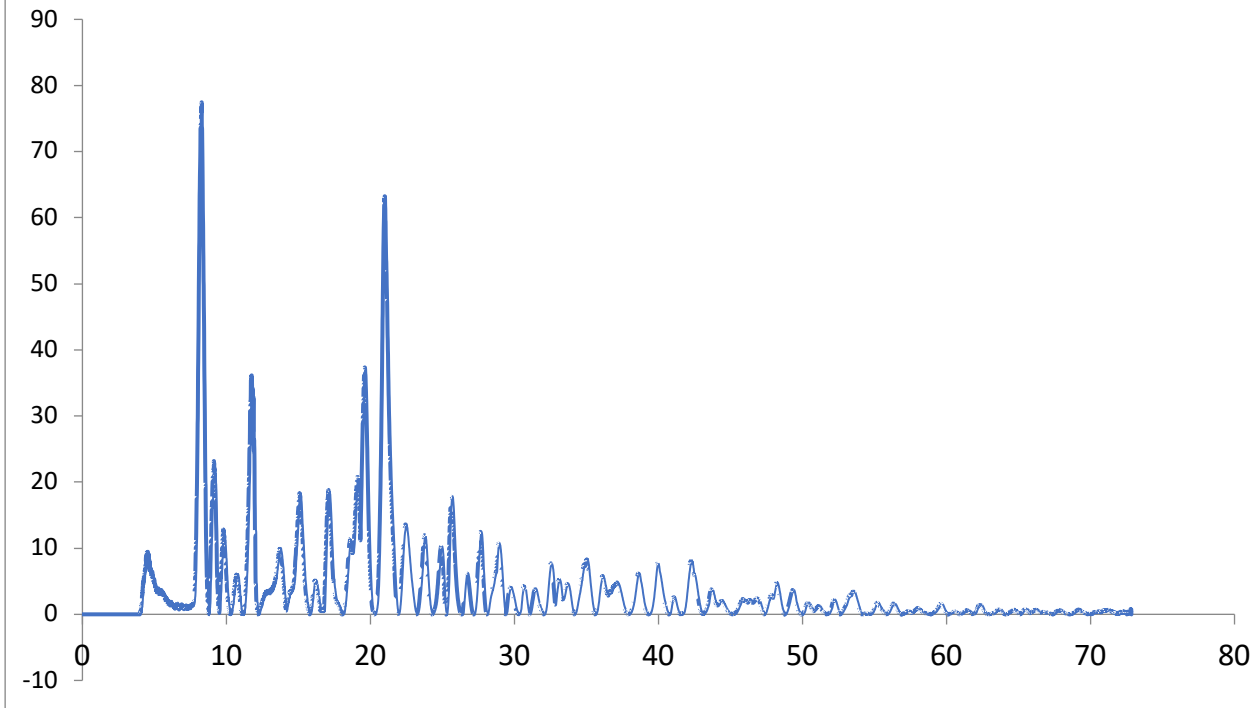

**1b.DABCO-calculated powder pattern**

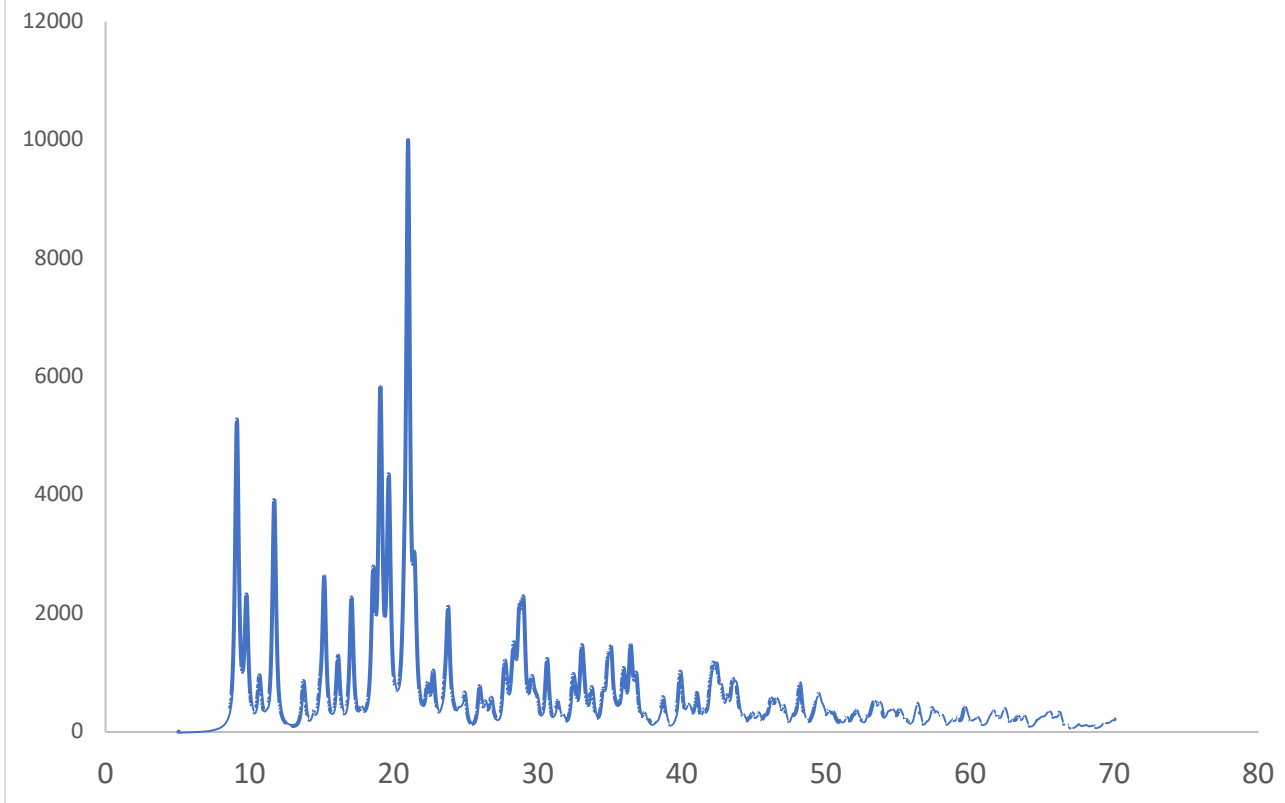

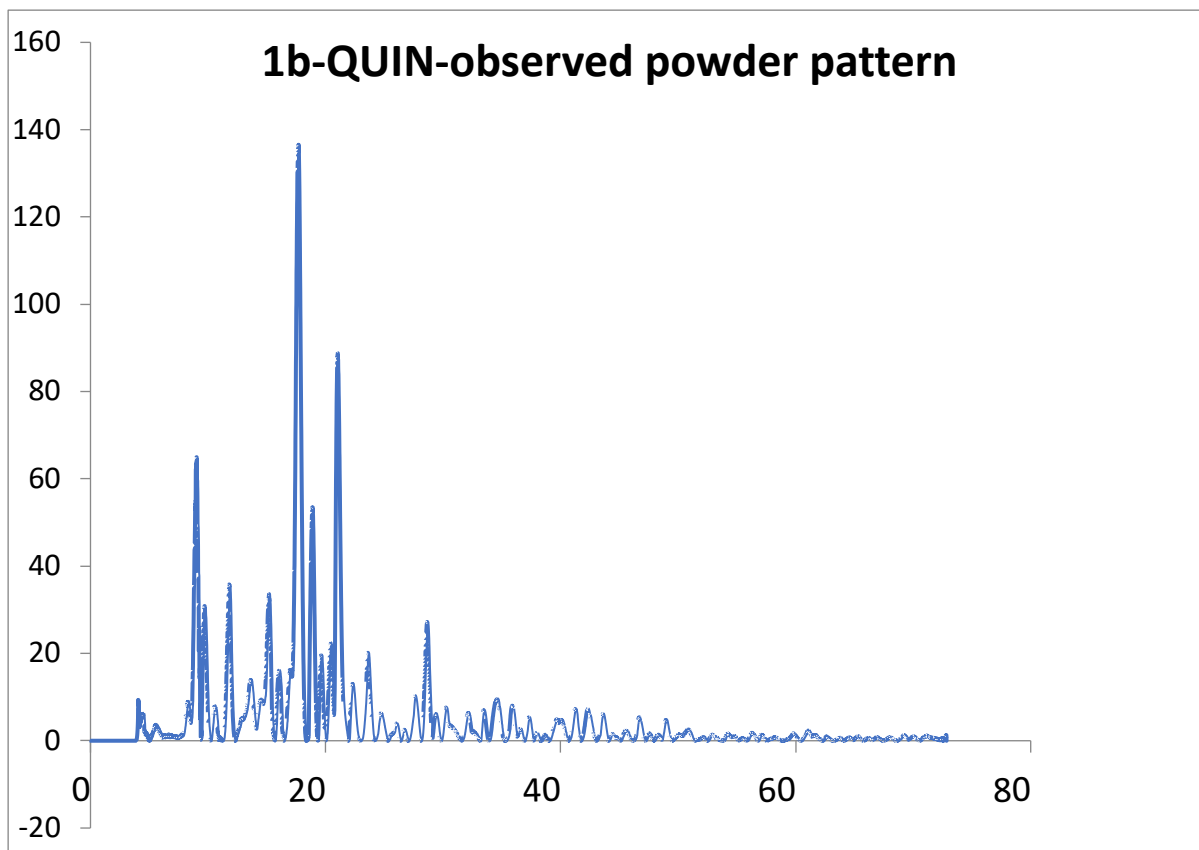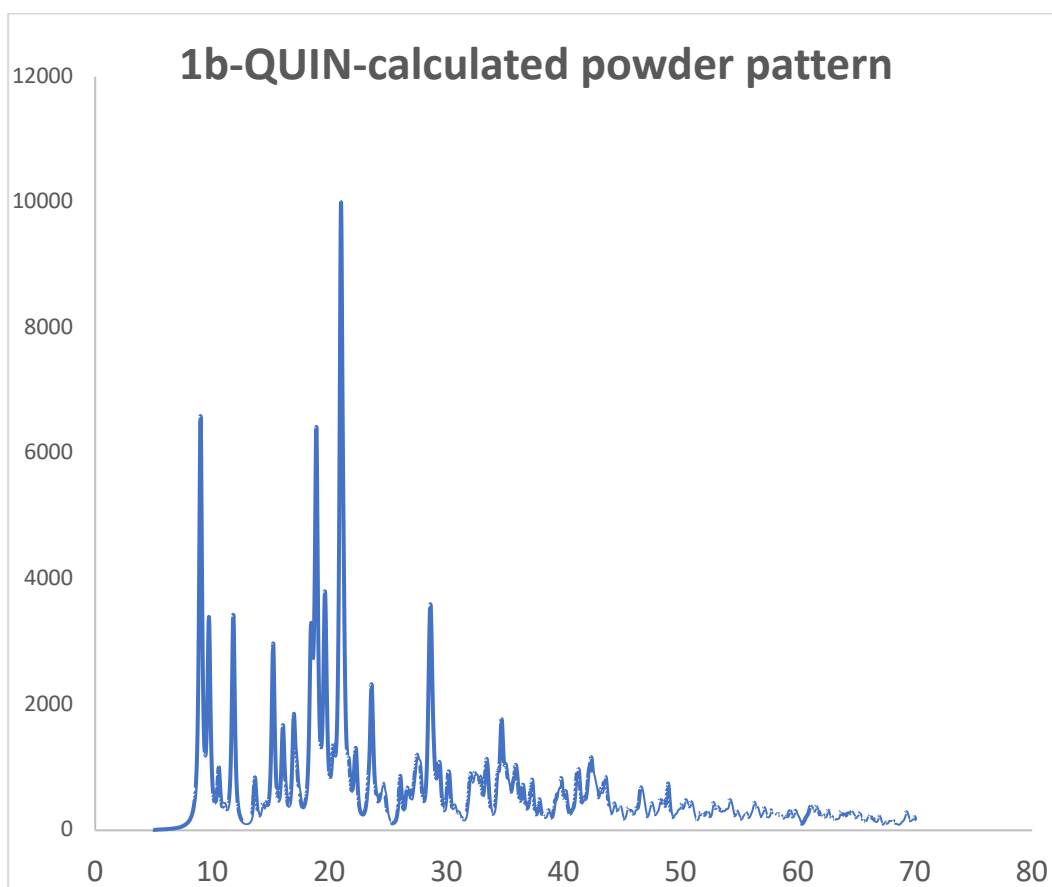

**3-Pyridine-observed powder pattern**

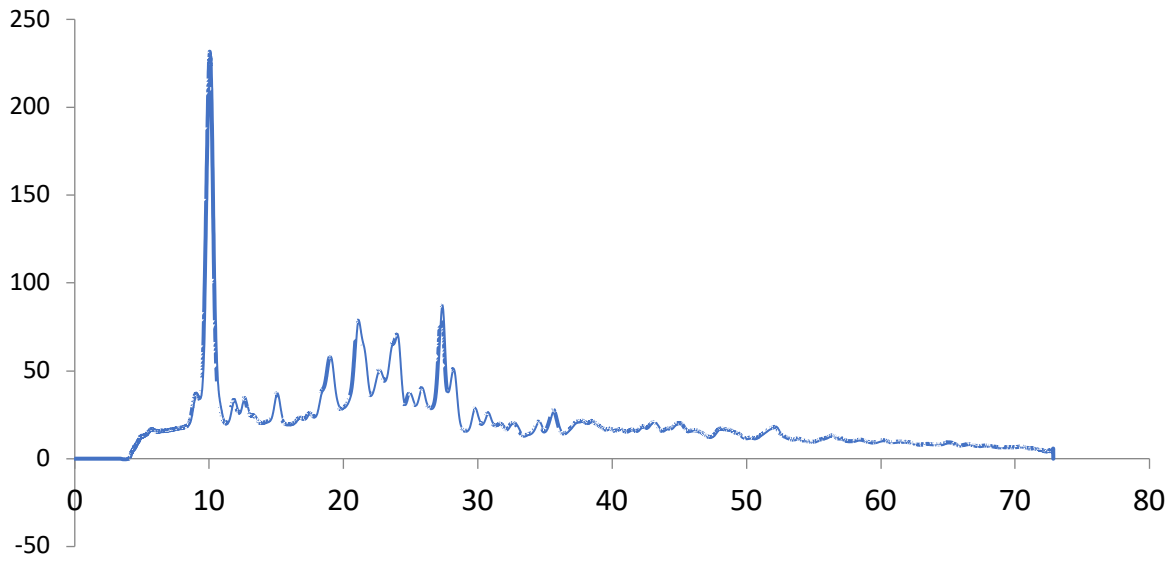

**3-Pyridine-calculated powder pattern**

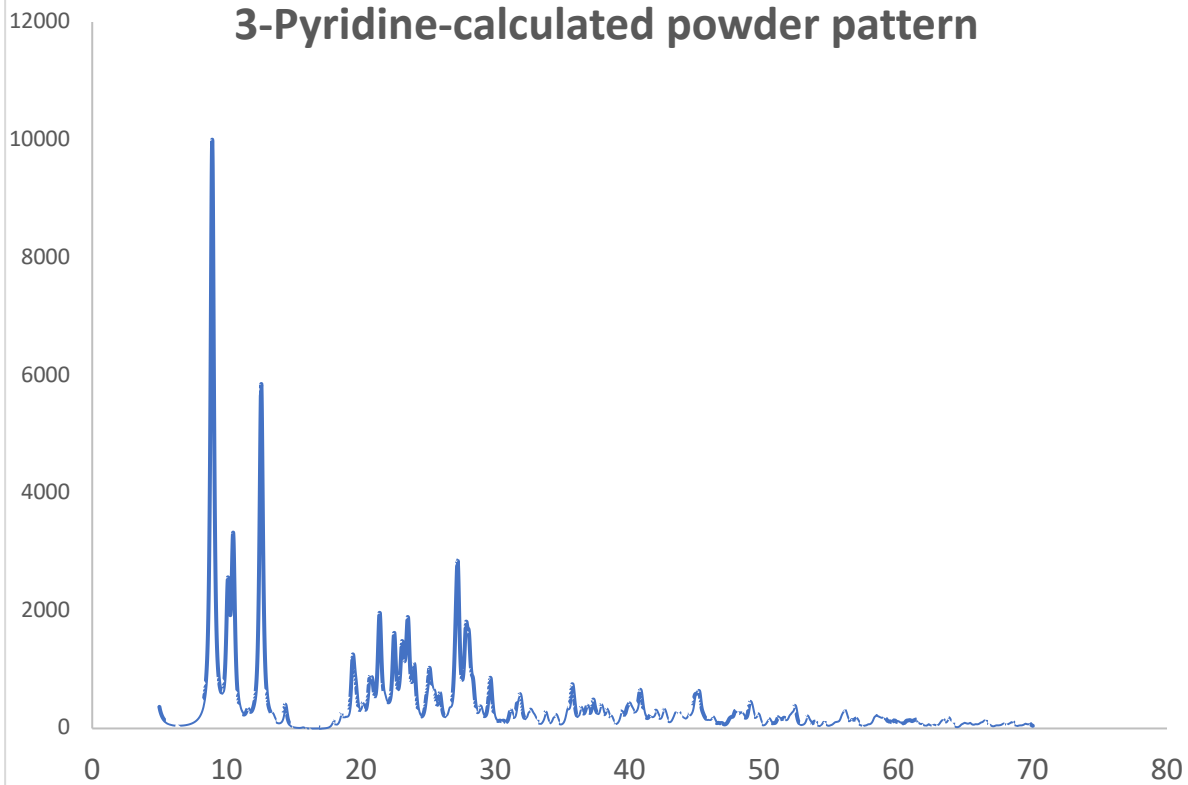

### 3-DMAP-observed powder pattern

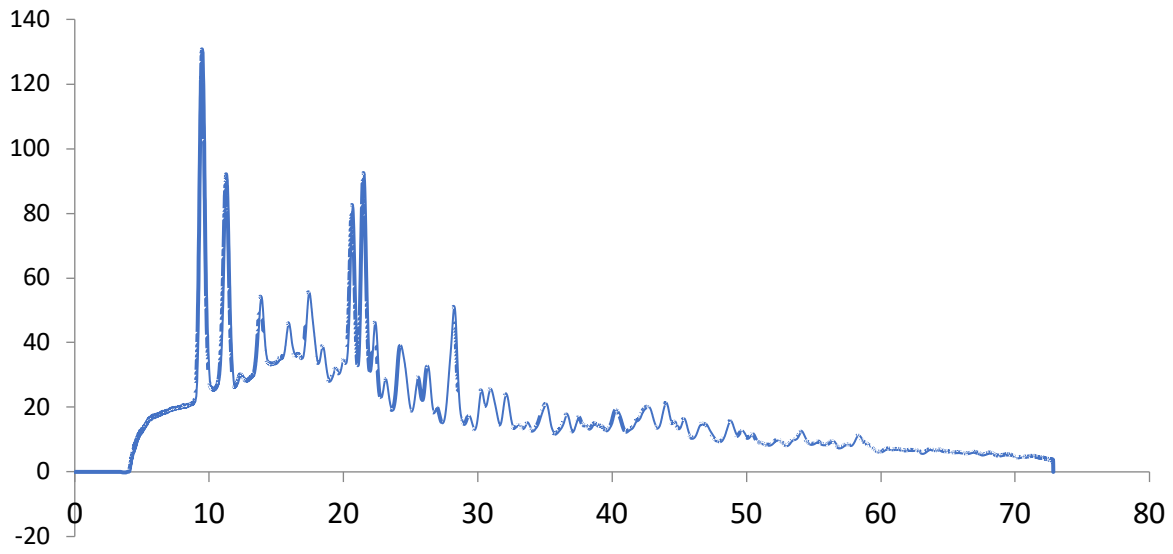

### 3-DMAP-calculated powder pattern

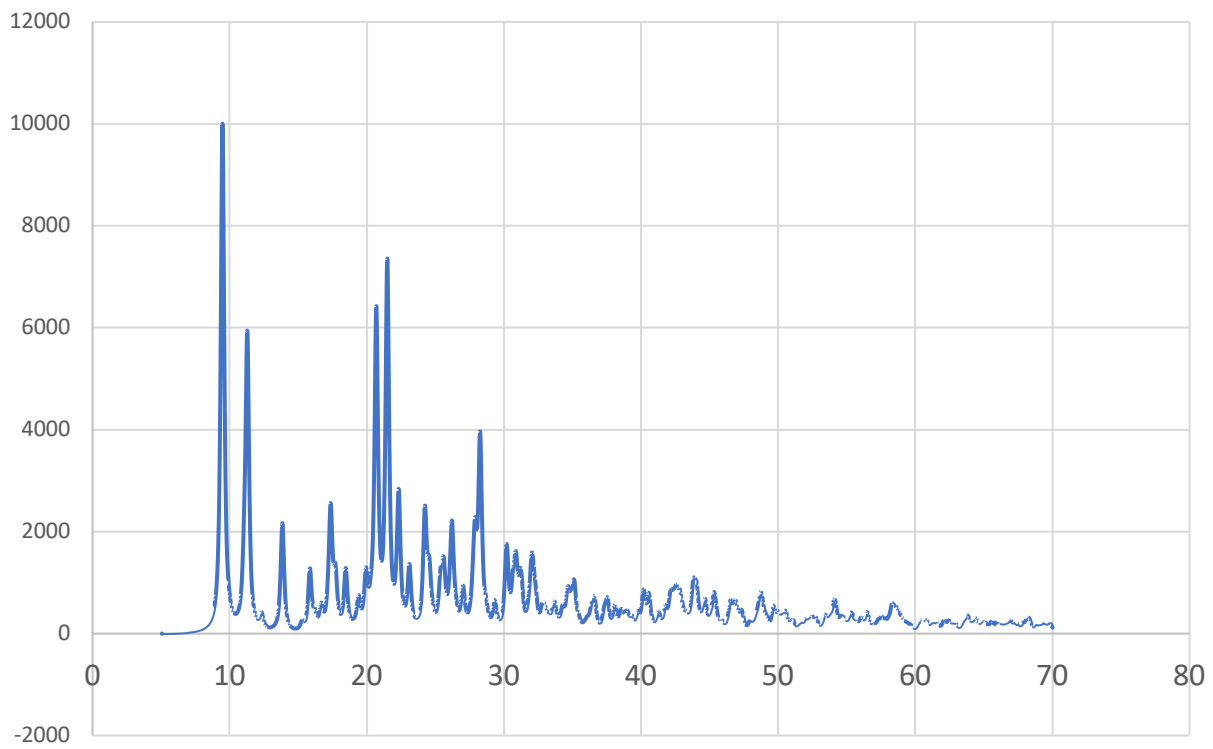



## References.

---

- <sup>1</sup> L. Engman, A. Hallberg, *J. Org. Chem.*, **1989**, *54*, 2964-2966.
- <sup>2</sup> N.P. Cowieson, D. Aragao, M. Clift, D.J. Ericsson, C. Gee, S.J. Harrop, N. Mudie, S. Panjikar, J.R. Price, A. Riboldi-Tunnicliffe, R. Williamson, T. Caradoc-Davies, *J. Synchrotron Radiation*, **2015**, *22*, 187.
- <sup>3</sup> G. Sheldrick, *Acta Crystallogr. Section C*, **2015**, *71*, 3.
- <sup>4</sup> Farrugia, L. J.; *J. Appl. Cryst.* **1997**, *30*, 565.
- <sup>5</sup> Farrugia, L. J.; *J. Appl. Cryst.* **1999**, *32*, 837.
- <sup>6</sup> J.-D. Chai and M. Head-Gordon, *Phys. Chem. Chem. Phys.*, **10** (2008) 6615-20.
- <sup>7</sup> F. Weigend and R. Ahlrichs, *Phys. Chem. Chem. Phys.*, **7** (2005) 3297-305
- <sup>8</sup> NBO Version 3.1, E. D. Glendening, A. E. Reed, J. E. Carpenter, and F. Weinhold.
- <sup>9</sup> Gaussian 09, Revision E.01, M. J. Frisch, G. W. Trucks, H. B. Schlegel, G. E. Scuseria, M. A. Robb, J. R. Cheeseman, G. Scalmani, V. Barone, G. A. Petersson, H. Nakatsuji, X. Li, M. Caricato, A. Marenich, J. Bloino, B. G. Janesko, R. Gomperts, B. Mennucci, H. P. Hratchian, J. V. Ortiz, A. F. Izmaylov, J. L. Sonnenberg, D. Williams-Young, F. Ding, F. Lipparini, F. Egidi, J. Goings, B. Peng, A. Petrone, T. Henderson, D. Ranasinghe, V. G. Zakrzewski, J. Gao, N. Rega, G. Zheng, W. Liang, M. Hada, M. Ehara, K. Toyota, R. Fukuda, J. Hasegawa, M. Ishida, T. Nakajima, Y. Honda, O. Kitao, H. Nakai, T. Vreven, K. Throssell, J. A. Montgomery, Jr., J. E. Peralta, F. Ogliaro, M. Bearpark, J. J. Heyd, E. Brothers, K. N. Kudin, V. N. Staroverov, T. Keith, R. Kobayashi, J. Normand, K. Raghavachari, A. Rendell, J. C. Burant, S. S. Iyengar, J. Tomasi, M. Cossi, J. M. Millam, M. Klene, C. Adamo, R. Cammi, J. W. Ochterski, R. L. Martin, K. Morokuma, O. Farkas, J. B. Foresman, and D. J. Fox, Gaussian, Inc., Wallingford CT, **2016**.
